# Supplementary material
Source: PubMed Central journal article supplement (PMC7540184)
Supplement: NIHMS1614348-supplement-Supporting_Information.pdf [file NIHMS1614348-supplement-Supporting_Information.pdf]

## Supporting Information

### **Triple-Negative Breast Cancer Cells Exhibit Differential Sensitivity to Cardenolides from *Calotropis gigantea***

Petra J. Pederson,<sup>†,‡</sup> Shengxin Cai,<sup>§,^</sup> Chase Carver,<sup>||</sup> Douglas R. Powell,<sup>^</sup> April L. Risinger,<sup>†,‡</sup> Tanja Grkovic,<sup>#</sup> Barry R. O’Keefe,<sup>⊥,¶</sup> Robert H. Cichewicz<sup>§,^,\*</sup>, and Susan L. Mooberry,<sup>†,‡,\*</sup>

<sup>†</sup>Department of Pharmacology, University of Texas Health Science Center, San Antonio, Texas, 78229, United States

<sup>‡</sup>Mays Cancer Center, University of Texas Health Science Center, San Antonio, Texas, 78229, United States

<sup>§</sup>Natural Products Discovery Group, Institute for Natural Products Applications and Research Technologies, Stephenson Life Science Research Center, University of Oklahoma, Norman, Oklahoma 73019, United States

<sup>^</sup>Department of Chemistry & Biochemistry, Stephenson Life Science Research Center, University of Oklahoma, Norman, Oklahoma 73019, United States

<sup>||</sup>Department of Cellular and Integrative Physiology, University of Texas Health Science Center, San Antonio, Texas, 78229, United States

<sup>#</sup>Natural Products Support Group, Leidos Biomedical Research, Inc., Frederick National Laboratory for Cancer Research, Frederick, Maryland, 21702, United States

<sup>⊥</sup>Natural Products Branch, Developmental Therapeutics Program, Division of Cancer Treatment and Diagnosis, National Cancer Institute, Frederick, Maryland, 21702, United States

<sup>¶</sup>Molecular Targets Program, Center for Cancer Research, National Cancer Institute, Frederick, Maryland, 21702, United States

\*Corresponding Authors

## List of Contents

|                       |                                                                                                          |         |
|-----------------------|----------------------------------------------------------------------------------------------------------|---------|
|                       | Supplementary methods for siRNA transfection and CRISPR gene knock out                                   | S3      |
| <b>Table S1</b>       | <sup>1</sup> H NMR Data for compounds <b>1–4</b> ( $\delta$ in ppm, $J$ in Hz)                           | S4      |
| <b>Table S2</b>       | <sup>13</sup> C NMR Data for compounds <b>1–4</b> , and <b>6–9</b> ( $\delta$ in ppm)                    | S5      |
| <b>Table S3</b>       | <sup>1</sup> H NMR Data for compounds <b>6–9</b> ( $\delta$ in ppm, $J$ in Hz)                           | S6      |
| <b>Table S4</b>       | List of sources for antibodies and dilutions used                                                        | S7      |
| <b>Figure S1</b>      | X-ray structures of compounds <b>1-3</b> , <b>7</b> , <b>8</b> , and bromobenzoyl derivative of <b>4</b> | S8      |
| <b>Figure S2</b>      | ECD curves of compounds <b>1-3</b> , <b>6</b> , and <b>7-9</b>                                           | S9      |
| <b>Figure S3</b>      | Concentration response data for cytotoxicity of <i>C. gigantea</i> cardenolides in TNBC cells            | S10     |
| <b>Figure S4</b>      | Effects of digoxin on intracellular calcium                                                              | S11     |
| <b>Figure S5</b>      | Total protein for western blots in Figure 5                                                              | S12     |
| <b>Figure S6</b>      | Validation of membrane enrichment and NCX1 antibody                                                      | S13     |
| <b>Figure S7</b>      | Effect of CRISPR knockout of NCX1 in BT-549 cells                                                        | S14     |
| <b>Figure S8-S14</b>  | NMR spectra and HRESIMS of uzarigenin ( <b>1</b> )                                                       | S15-S18 |
| <b>Figure S15-S21</b> | 1D, 2D NMR spectra and HRESIMS of coroglaucigenin ( <b>2</b> )                                           | S18-S21 |
| <b>Figure S22-S28</b> | 1D, 2D NMR spectra and HRESIMS of desglucouzarin ( <b>3</b> )                                            | S22-S25 |
| <b>Figure S29-S35</b> | 1D, 2D NMR spectra and HRESIMS of frugoside ( <b>4</b> )                                                 | S25-S28 |
| <b>Figure S36-S42</b> | 1D, 2D NMR spectra and HRESIMS of frugosidal ( <b>5</b> )                                                | S29-S32 |
| <b>Figure S43-S49</b> | 1D, 2D NMR spectra and HRESIMS of glucofrugoside ( <b>6</b> )                                            | S32-S35 |
| <b>Figure S50-S56</b> | 1D, 2D NMR spectra and HRESIMS of uscharin ( <b>7</b> )                                                  | S36-S39 |
| <b>Figure S57-S63</b> | 1D, 2D NMR spectra and HRESIMS of calotoxin ( <b>8</b> )                                                 | S39-S42 |
| <b>Figure S64-S70</b> | 1D, 2D NMR spectra and HRESIMS of calotropin ( <b>9</b> )                                                | S43-S46 |

## Supplementary Methods for siRNA Transfection and CRISPR Gene Knock Out

**siRNA Transfection.** BT-549 cells were transfected for 48 h with Lipofectamine RNAi-MAX (Thermo Fisher Scientific) at a final concentration of 0.05% (v/v) and according to the manufacturer's directions. A pool of predesigned siRNAs targeting the SLC8A1 gene (NCX1) were purchased from Sigma: SASI\_Hs02\_00325545, SASI\_Hs02\_00325535, SASI\_Hs02\_00325555, SASI\_Hs01\_00071833. MISSION® siRNA Universal Negative Control #1 (Sigma) was used as a negative control. The final concentration of pooled siRNA or negative control siRNA was 5 nM. Following transfection, cells were harvested for membrane enrichment.

**CRISPR Gene Knock Out.** BT-549 cells expressing doxycycline-inducible Cas9 were kindly provided by Ratna Vadlamudi. sgRNAs targeting the SLC8A1 gene (NCX1) were designed using the Synthego (Redwood City, CA, USA) CRISPR design tool and the top 3 sequences were purchased, each with the Synthego modified EZ scaffold: U\*C\*U\*UCCUCUUUGCUGGUCAG, A\*C\*U\*GACCAGCAAAGAGGAAG, G\*C\*A\*GCCACUGACCAGCAAAG where \* in the nucleotide sequence indicates 2'-O-methyl analogs and 3'-phosphorothioate internucleotide linkages. A negative control scrambled sgRNA was purchased from Synthego with the following sequence: G\*C\*A\*CUACCAGAGCUAACUCA. Cells were transfected with Lipofectamine RNAi-MAX (Thermo Fisher Scientific) at a final concentration of 0.2% (v/v) with either scrambled control sgRNA or the pool of 3 sgRNAs targeting SLC8A1/NCX1 for a final concentration of 8.6 nM sgRNA in the presence of 50 ng/ml doxycycline. Cells were harvested 48 h later and used for either membrane enrichment and NCX1 western blot to validate knockout or plated in a 96-well plate and treated with calotropin for 48 h and cytotoxicity determined using the SRB assay.

**Table S1. <sup>1</sup>H NMR Data for Compounds 1–4 ( $\delta$  in ppm,  $J$  in Hz)**

| NO. | 1 <sup>a</sup>                             | 2 <sup>b</sup>                                    | 3 <sup>a</sup>                               | 4 <sup>c</sup>                                    |
|-----|--------------------------------------------|---------------------------------------------------|----------------------------------------------|---------------------------------------------------|
| 1   | 1.59, overlap; 0.88, overlap               | 2.15, dt (13.1, 3.4); 0.59, ddd (13.4, 13.4, 3.7) | 1.64, overlap; 0.91, overlap                 | 2.33, dt (13.4, 3.7); 0.80, ddd (13.7, 13.7, 3.7) |
| 2   | 1.60, overlap; 1.22, overlap               | 1.58, overlap; 1.28, overlap                      | 1.62, overlap; 1.14, overlap                 | 1.89, overlap; 1.55, overlap                      |
| 3   | 3.31, m                                    | 3.36, m                                           | 3.54, m                                      | 3.68, m                                           |
| 4   | 1.39, overlap; 1.12, overlap               | 1.44, overlap; 1.23, overlap                      | 1.74, overlap; 1.35, overlap                 | 1.78, overlap; 1.43, overlap                      |
| 5   | 0.98, m                                    | 1.08, overlap                                     | 0.99, dd (12.6, 12.1)                        | 1.22, overlap                                     |
| 6   | 1.23, overlap; 1.10, overlap               | 1.16, overlap; 1.08, overlap                      | 1.28, overlap; 1.12, overlap                 | 1.33, overlap; 1.21, overlap                      |
| 7   | 1.96, overlap; 0.92, overlap               | 1.98, overlap; 0.94, m                            | 1.96, overlap; 0.94, overlap                 | 2.07, m; 1.13, m                                  |
| 8   | 1.39, overlap                              | 1.63, ddd (12.0, 11.9, 3.6)                       | 1.39, overlap                                | 1.78, overlap                                     |
| 9   | 0.85, overlap                              | 0.84, ddd (12.1, 12.0, 3.6)                       | 0.87, overlap                                | 1.02, m                                           |
| 10  |                                            |                                                   |                                              |                                                   |
| 11  | 1.40, overlap; 1.12, overlap               | 1.55, overlap; 1.45, overlap                      | 1.40, overlap; 1.13, overlap                 | 1.64, overlap                                     |
| 12  | 1.37, m; 1.30, ddd (14.2, 13.4, 3.8)       | 1.36, dt (13.6, 3.3); 1.23, overlap               | 1.38, overlap; 1.31, overlap                 | 1.51, overlap; 1.40, overlap                      |
| 13  |                                            |                                                   |                                              |                                                   |
| 14  |                                            |                                                   |                                              |                                                   |
| 15  | 1.91, overlap; 1.55, overlap               | 1.94, overlap; 1.55, overlap                      | 1.92, dd (11.4, 10.6); 1.56, dd (11.0, 11.0) | 2.13, overlap; 1.71, m                            |
| 16  | 1.98, overlap; 1.75, m                     | 1.99, overlap; 1.76, m                            | 1.98, overlap; 1.75, overlap                 | 2.17, overlap; 1.88, overlap                      |
| 17  | 2.70, dd (9.4, 5.3)                        | 2.71, dd (9.1, 5.1)                               | 2.71, dd (9.5, 5.3)                          | 2.84, dd (9.1, 5.1)                               |
| 18  | 0.75, s                                    | 0.80, s                                           | 0.76, s                                      | 0.94, s                                           |
| 19  | 0.70, s                                    | 3.65, dd (11.5, 4.3); 3.49, dd (11.4, 3.7)        | 0.72, s                                      | 3.86, d (11.8); 3.74, d (10.7)                    |
| 20  |                                            |                                                   |                                              |                                                   |
| 21  | 4.94, dd (18.3, 1.9); 4.86, dd (18.3, 1.7) | 4.96, dd (18.5, 1.9); 4.87, dd (18.5, 1.8)        | 4.94, dd (17.9, 1.9); 4.86, d (18.3, 1.7)    | 5.04, dd (18.4, 1.8); 4.92, dd (18.4, 1.8)        |
| 22  | 5.88, s                                    | 5.89, s                                           | 5.89, s                                      | 5.91, s                                           |
| 23  |                                            |                                                   |                                              |                                                   |
| 1'  |                                            |                                                   | 4.20, d (7.8)                                | 4.73, d (8.0)                                     |
| 2'  |                                            |                                                   | 2.86, dd (8.5, 8.5)                          | 3.27, dd (8.0, 3.0)                               |
| 3'  |                                            |                                                   | 3.10, dd (9.8, 9.6)                          | 4.02, dd (3.1, 3.0)                               |
| 4'  |                                            |                                                   | 2.99, dd (9.1, 8.9)                          | 3.16, dd (9.6, 2.9)                               |
| 5'  |                                            |                                                   | 3.04, dd (9.4, 6.4)                          | 3.73, overlap                                     |
| 6'  |                                            |                                                   | 3.63, d (11.6); 3.39, m                      | 1.24, d (6.3)                                     |

<sup>a</sup>obtained on a 600 MHz Varian instrument in the solvent of DMSO-*d*<sub>6</sub>; <sup>b</sup>obtained on a 500 MHz Varian instrument in the solvent of DMSO-*d*<sub>6</sub>; <sup>c</sup>obtained on a 500 MHz Varian instrument in the solvent of methanol-*d*<sub>4</sub>

**Table S2. <sup>13</sup>C NMR Data for Compounds 1–4, and 6-9 (δ in ppm)**

| NO. | 1 <sup>a</sup>       | 2 <sup>b</sup>       | 3 <sup>a</sup>       | 4 <sup>c</sup>       | 6 <sup>a</sup>       | 7 <sup>a</sup>       | 8 <sup>a</sup>       | 9 <sup>d</sup>       |
|-----|----------------------|----------------------|----------------------|----------------------|----------------------|----------------------|----------------------|----------------------|
| 1   | 37.2 CH <sub>2</sub> | 31.8 CH <sub>2</sub> | 37.1 CH <sub>2</sub> | 32.7 CH <sub>2</sub> | 31.8 CH <sub>2</sub> | 35.7 CH <sub>2</sub> | 35.7 CH <sub>2</sub> | 36.8 CH <sub>2</sub> |
| 2   | 31.7 CH <sub>2</sub> | 32.1 CH <sub>2</sub> | 34.4 CH <sub>2</sub> | 30.8 CH <sub>2</sub> | 30.0 CH <sub>2</sub> | 69.4 CH              | 68.7 CH              | 70.2 CH              |
| 3   | 69.8 CH              | 69.7 CH              | 76.8 CH              | 79.4 CH              | 77.2 CH              | 71.4 CH              | 71.6 CH              | 73.3 CH              |
| 4   | 38.5 CH <sub>2</sub> | 38.9 CH <sub>2</sub> | 29.5 CH <sub>2</sub> | 35.8 CH <sub>2</sub> | 35.1 CH <sub>2</sub> | 33.4 CH <sub>2</sub> | 33.4 CH <sub>2</sub> | 34.4 CH <sub>2</sub> |
| 5   | 44.5 CH              | 44.8 CH              | 44.2 CH              | 45.9 CH              | 44.4 CH              | 42.9 CH              | 42.8 CH              | 44.4 CH              |
| 6   | 29.0 CH <sub>2</sub> | 28.5 CH <sub>2</sub> | 28.9 CH <sub>2</sub> | 29.4 CH <sub>2</sub> | 28.5 CH <sub>2</sub> | 21.8 CH <sub>2</sub> | 21.8 CH <sub>2</sub> | 23.0 CH <sub>2</sub> |
| 7   | 27.7 CH <sub>2</sub> | 27.8 CH <sub>2</sub> | 27.7 CH <sub>2</sub> | 28.7 CH <sub>2</sub> | 27.7 CH <sub>2</sub> | 27.6 CH <sub>2</sub> | 27.6 CH <sub>2</sub> | 28.6 CH <sub>2</sub> |
| 8   | 41.3 CH              | 41.7 CH              | 41.2 CH              | 43.0 CH              | 41.7 CH              | 42.2 CH              | 42.2 CH              | 43.4 CH              |
| 9   | 49.6 CH              | 50.2 CH              | 49.5 CH              | 51.5 CH              | 50.1 CH              | 47.8 CH              | 47.8 CH              | 49.6 CH              |
| 10  | 35.8 C               | 39.1 C               | 35.9 C               | 40.5 C               | 39.2 C               | 52.8 C               | 52.7 C               | 54.0 C               |
| 11  | 21.3 CH <sub>2</sub> | 22.9 CH <sub>2</sub> | 21.2 CH <sub>2</sub> | 24.0 CH <sub>2</sub> | 22.8 CH <sub>2</sub> | 27.5 CH <sub>2</sub> | 27.5 CH <sub>2</sub> | 28.8 CH <sub>2</sub> |
| 12  | 39.4 CH <sub>2</sub> | 40.1 CH <sub>2</sub> | 39.3 CH <sub>2</sub> | 41.5 CH <sub>2</sub> | 40.0 CH <sub>2</sub> | 38.8 CH <sub>2</sub> | 38.8 CH <sub>2</sub> | 40.2 CH <sub>2</sub> |
| 13  | 49.8 C               | 50.0 C               | 49.8 C               | 51.1 C               | 50.0 C               | 49.5 C               | 49.6 C               | 50.7 C               |
| 14  | 84.1 C               | 84.2 C               | 84.1 C               | 86.4 C               | 84.3 C               | 83.8 C               | 83.8 C               | 85.7 C               |
| 15  | 32.6 CH <sub>2</sub> | 32.5 CH <sub>2</sub> | 32.6 CH <sub>2</sub> | 33.4 CH <sub>2</sub> | 32.6 CH <sub>2</sub> | 31.9 CH <sub>2</sub> | 31.9 CH <sub>2</sub> | 32.7 CH <sub>2</sub> |
| 16  | 26.8 CH <sub>2</sub> | 26.8 CH <sub>2</sub> | 26.8 CH <sub>2</sub> | 28.0 CH <sub>2</sub> | 26.8 CH <sub>2</sub> | 26.7 CH <sub>2</sub> | 26.6 CH <sub>2</sub> | 27.8 CH <sub>2</sub> |
| 17  | 50.6 CH              | 50.7 CH              | 50.6 CH              | 52.1 CH              | 50.7 CH              | 50.3 CH              | 50.4 CH              | 51.8 CH              |
| 18  | 16.1 CH <sub>3</sub> | 16.3 CH <sub>3</sub> | 16.1 CH <sub>3</sub> | 16.5 CH <sub>3</sub> | 16.3 CH <sub>3</sub> | 15.9 CH <sub>3</sub> | 15.9 CH <sub>3</sub> | 16.1 CH <sub>3</sub> |
| 19  | 12.5 CH <sub>3</sub> | 58.1 CH <sub>2</sub> | 12.4 CH <sub>3</sub> | 60.0 CH <sub>2</sub> | 58.3 CH              | 209.3 CH             | 209.3 CH             | 209.4 CH             |
| 20  | 176.8 C              | 176.9 C              | 176.8 C              | 178.5 C              | 176.9 C              | 176.6 C              | 176.6 C              | 178.2 C              |
| 21  | 73.6 CH <sub>2</sub> | 73.6 CH <sub>2</sub> | 73.6 CH <sub>2</sub> | 75.3 CH <sub>2</sub> | 73.6 CH <sub>2</sub> | 73.6 CH <sub>2</sub> | 73.6 CH <sub>2</sub> | 75.3 CH <sub>2</sub> |
| 22  | 116.7 CH             | 116.6 CH             | 116.7 CH             | 117.7 CH             | 116.6 CH             | 116.8 CH             | 116.8 CH             | 117.9 CH             |
| 23  | 174.3 C              | 174.3 C              | 174.3 C              | 177.2 C              | 174.3 C              | 174.2 C              | 174.3 C              | 177.2 C              |
| 1'  |                      |                      | 101.1 CH             | 99.8 CH              | 98.6 CH              | 95.6 CH              | 93.9 CH              | 97.3 CH              |
| 2'  |                      |                      | 73.9 CH              | 72.5 CH              | 70.9 CH              | 99.1 C               | 92.6 C               | 92.7 C               |
| 3'  |                      |                      | 77.2 CH              | 72.9 CH              | 71.1 CH              | 91.9 C               | 73.7 CH              | 73.9 CH              |
| 4'  |                      |                      | 70.6 CH              | 74.4 CH              | 82.4 CH              | 47.9 CH <sub>2</sub> | 71.4 CH              | 39.6 CH <sub>2</sub> |
| 5'  |                      |                      | 77.2 CH              | 70.5 CH              | 67.8 CH              | 67.8 CH              | 68.7 CH              | 69.4 CH              |
| 6'  |                      |                      | 61.6 CH <sub>2</sub> | 18.2 CH <sub>3</sub> | 18.2 CH <sub>3</sub> | 21.2 CH <sub>3</sub> | 18.4 CH <sub>3</sub> | 21.3 CH <sub>3</sub> |
| 1'' |                      |                      |                      |                      | 105.0 CH             | 161.6 CH             |                      |                      |
| 2'' |                      |                      |                      |                      | 73.9 CH              | 43.3 CH <sub>2</sub> |                      |                      |
| 3'' |                      |                      |                      |                      | 77.2                 |                      |                      |                      |
| 4'' |                      |                      |                      |                      | 70.4 CH              |                      |                      |                      |
| 5'' |                      |                      |                      |                      | 77.1 CH              |                      |                      |                      |
| 6'' |                      |                      |                      |                      | 61.6 CH <sub>2</sub> |                      |                      |                      |

<sup>a</sup>obtained on a 150 MHz Varian instrument in the solvent of DMSO-*d*<sub>6</sub>; <sup>b</sup>obtained on a 125 MHz Varian instrument in the solvent of DMSO-*d*<sub>6</sub>; <sup>c</sup>obtained on a 125 MHz Varian instrument in the solvent of methanol-*d*<sub>4</sub>; <sup>d</sup>obtained on a 150 MHz Varian instrument in the solvent of methanol-*d*<sub>4</sub>;

**Table S3. <sup>1</sup>H NMR Data for Compounds 6–9 ( $\delta$  in ppm,  $J$  in Hz)**

| NO. | 6 <sup>a</sup>                        | 7 <sup>b</sup>                              | 8 <sup>b</sup>                              | 9 <sup>c</sup>                              |
|-----|---------------------------------------|---------------------------------------------|---------------------------------------------|---------------------------------------------|
| 1   | 2.18, d (12.6); 0.62, dd (12.1, 13.7) | 2.20, dd (12.5, 4.4); 1.03, dd (12.4, 12.3) | 2.20, dd (12.5, 4.3); 0.97, dd (12.2, 12.0) | 2.46, dd (12.7, 4.4); 1.13, dd (12.3, 12.2) |
| 2   | 1.68, overlap; 1.41, overlap          | 3.71, m                                     | 3.68, overlap                               | 3.85, ddd (12.0, 10.0, 4.4)                 |
| 3   | 3.51, overlap                         | 3.85, overlap                               | 3.72, overlap                               | 3.93, ddd (11.4, 10.4, 4.4)                 |
| 4   | 1.62, overlap; 1.26, overlap          | 1.55, overlap; 1.22, overlap                | 1.50, overlap; 1.20, dd (12.2, 11.9)        | 1.65, overlap; 1.40, overlap                |
| 5   | 1.07, overlap                         | 1.51, overlap                               | 1.47, overlap                               | 1.55, overlap                               |
| 6   | 1.20, overlap; 1.08, overlap          | 1.57, overlap                               | 1.55, overlap                               | 1.75, overlap; 1.29, overlap                |
| 7   | 1.97, overlap; 0.93, m                | 2.13, d (12.7); 1.10, overlap               | 2.12, d (12.8); 1.09, overlap               | 2.23, dd (13.2, 3.5); 1.30, overlap         |
| 8   | 1.62, overlap                         | 1.39, overlap                               | 1.34, overlap                               | 1.59, overlap                               |
| 9   | 0.85, dd (12.5, 11.9)                 | 1.38, overlap                               | 1.37, overlap                               | 1.44, overlap                               |
| 10  |                                       |                                             |                                             |                                             |
| 11  | 1.53, overlap; 1.45, overlap          | 1.90, overlap; 1.55, overlap                | 1.88, overlap; 1.52, overlap                | 2.02, dd (13.2, 4.0); 1.66, overlap         |
| 12  | 1.36, overlap; 1.23, overlap          | 1.37, overlap; 1.27, overlap                | 1.37, overlap; 1.26, overlap                | 1.51, overlap; 1.44, overlap                |
| 13  |                                       |                                             |                                             |                                             |
| 14  |                                       |                                             |                                             |                                             |
| 15  | 1.94, overlap; 1.56, overlap          | 1.92, overlap; 1.55, overlap                | 1.91, m; 1.54, overlap                      | 2.11, overlap; 1.69, overlap                |
| 16  | 2.00, overlap; 1.76, m                | 1.98, overlap; 1.76, m                      | 1.99, m; 1.76, m                            | 2.12, overlap; 1.87, overlap                |
| 17  | 2.71, dd (8.8, 5.5)                   | 2.71, dd (9.4, 5.4)                         | 2.70, dd (9.4, 5.3)                         | 2.83, dd (9.3, 5.3)                         |
| 18  | 0.79, s                               | 0.67, s                                     | 0.67, s                                     | 0.83, s                                     |
| 19  | 3.64, overlap; 3.49, overlap          | 9.96, s                                     | 9.94, s                                     | 10.03, s                                    |
| 20  |                                       |                                             |                                             |                                             |
| 21  | 4.96, d (17.7); 4.88, d (17.8)        | 4.92, dd (18.4, 1.9); 4.86, dd (18.2, 1.8)  | 4.92, dd (18.2, 1.9); 4.85, dd (18.3, 1.7)  | 5.02, dd (18.6, 1.8); 4.91, dd (18.4, 1.8)  |
| 22  | 5.90, s                               | 5.88, s                                     | 5.88, s                                     | 5.90, s                                     |
| 23  |                                       |                                             |                                             |                                             |
| 1'  | 4.54, d (8.0)                         | 4.67, s                                     | 4.47, s                                     | 4.45, brs                                   |
| 2'  | 3.06, overlap                         |                                             |                                             |                                             |
| 3'  | 4.05, d s                             |                                             | 3.39, dd (3.0, 2.6)                         | 3.59, dd (12.0, 4.9)                        |
| 4'  | 3.10, overlap                         | 1.99, overlap; 1.67, d (13.3, 2.2)          | 3.21, m                                     | 1.73, overlap; 1.59, overlap                |
| 5'  | 3.69, m                               | 4.09, ddd (11.3, 6.4, 2.0)                  | 3.65, overlap                               | 3.66, m                                     |
| 6'  | 1.17, d (6.2)                         | 1.09, d (6.2)                               | 1.11, d (6.2)                               | 1.24, d (6.2)                               |
| 1'' | 4.22, d (7.8)                         | 7.54, s                                     |                                             |                                             |
| 2'' | 2.98, dd (8.5, 8.3)                   | 3.86, d (16.4); 3.79, m (16.5)              |                                             |                                             |
| 3'' | 3.10, overlap                         |                                             |                                             |                                             |
| 4'' | 3.03, overlap                         |                                             |                                             |                                             |
| 5'' | 3.08, overlap                         |                                             |                                             |                                             |
| 6'' | 3.64, overlap; 3.42, m                |                                             |                                             |                                             |

<sup>a</sup>obtained on a 500 MHz Varian instrument in the solvent of DMSO-*d*<sub>6</sub>; <sup>b</sup>obtained on a 600 MHz Varian instrument in the solvent of DMSO-*d*<sub>6</sub>; <sup>c</sup>obtained on a 500 MHz Varian instrument in the solvent of methanol-*d*<sub>4</sub>

**Table S4. List of sources for antibodies and dilutions used**

| <b>Target</b>                                     | <b>Vendor Information</b>                  | <b>Dilution</b> | <b>Figure</b>   |
|---------------------------------------------------|--------------------------------------------|-----------------|-----------------|
| Na <sup>+</sup> /K <sup>+</sup> ATPase $\alpha$ 1 | EMD Millipore, 05-369 (C464.6)             | 1:500           | 5A              |
| Na <sup>+</sup> /K <sup>+</sup> ATPase $\alpha$ 2 | EMD Millipore, 07-674                      | 1:5,000         | 5A              |
| Na <sup>+</sup> /K <sup>+</sup> ATPase $\alpha$ 3 | Invitrogen, MA3-915 (XVIF9-G10)            | 1:1,000         | 5A              |
| NCX1                                              | Abcam ab2869 (C2C12)                       | 1:1,000         | 5C, S6B,<br>S7A |
| GAPDH                                             | Cell Signaling Technologies, 5174 (D16H11) | 1:1,000         | S6A,<br>S7A     |
| Flotillin-1                                       | BD Biosciences, 610820                     | 1:1,000         | S6A,<br>S7A     |

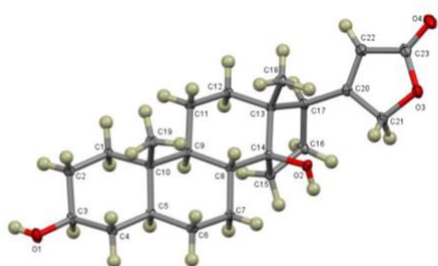

Uzarigenin (1)

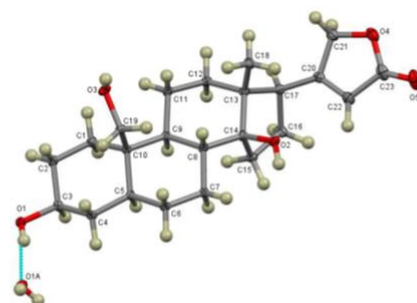

Coroglaucigenin (2)

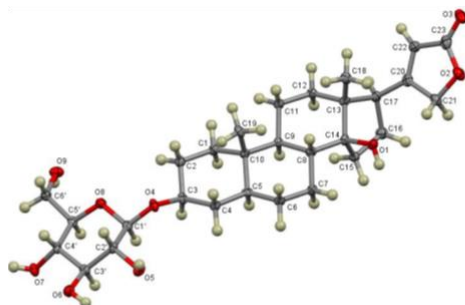

Desglucouzarin (3)

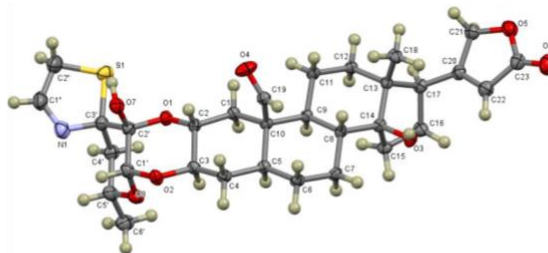

Uscharin (7)

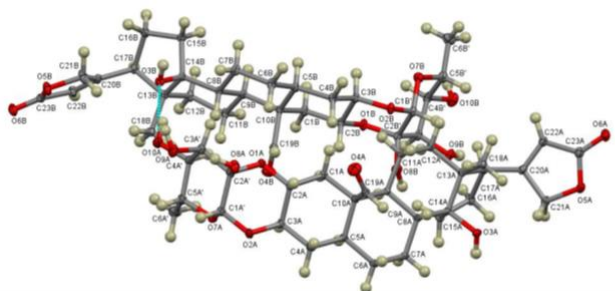

Calotoxin (8)

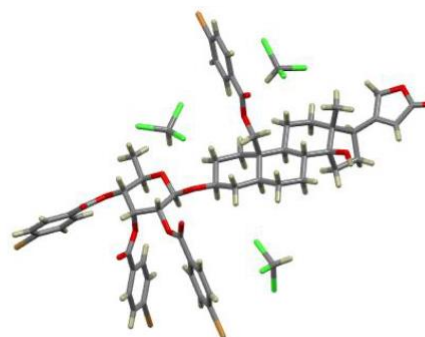

Bromobenzoyl derivative of 4

Figure S1. X-ray structures of compounds 1-3, 7, 8, and bromobenzoyl derivative of 4



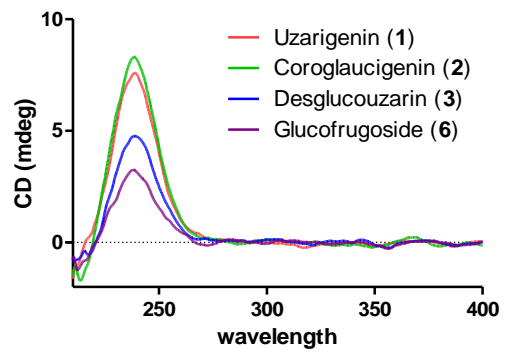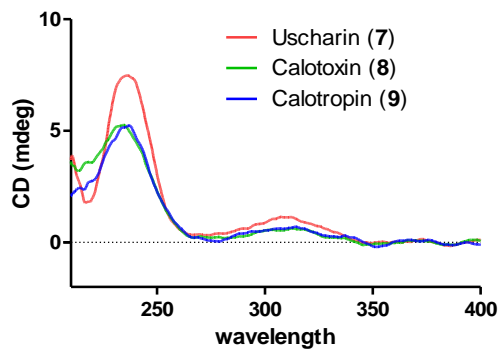

**Figure S2.** ECD curves of compounds **1-3, 6,** and **7-9**

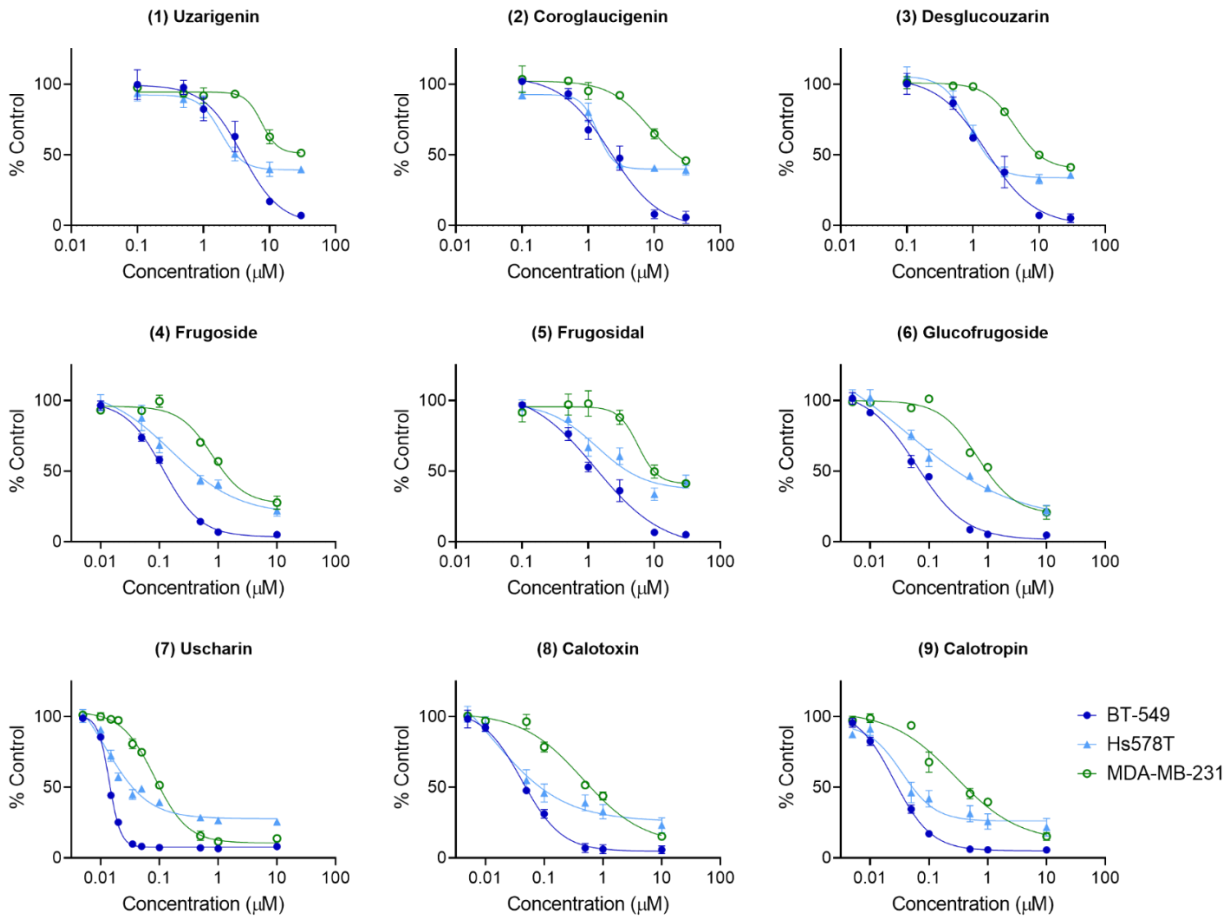

**Figure S3.** Concentration response data for cytotoxicity of *C. gigantea* cardenolides in TNBC cells. Data are represented as percent of vehicle control after 48 h treatment. Each concentration was tested in triplicate in three independent experiments and the mean  $\pm$  SEM is shown.

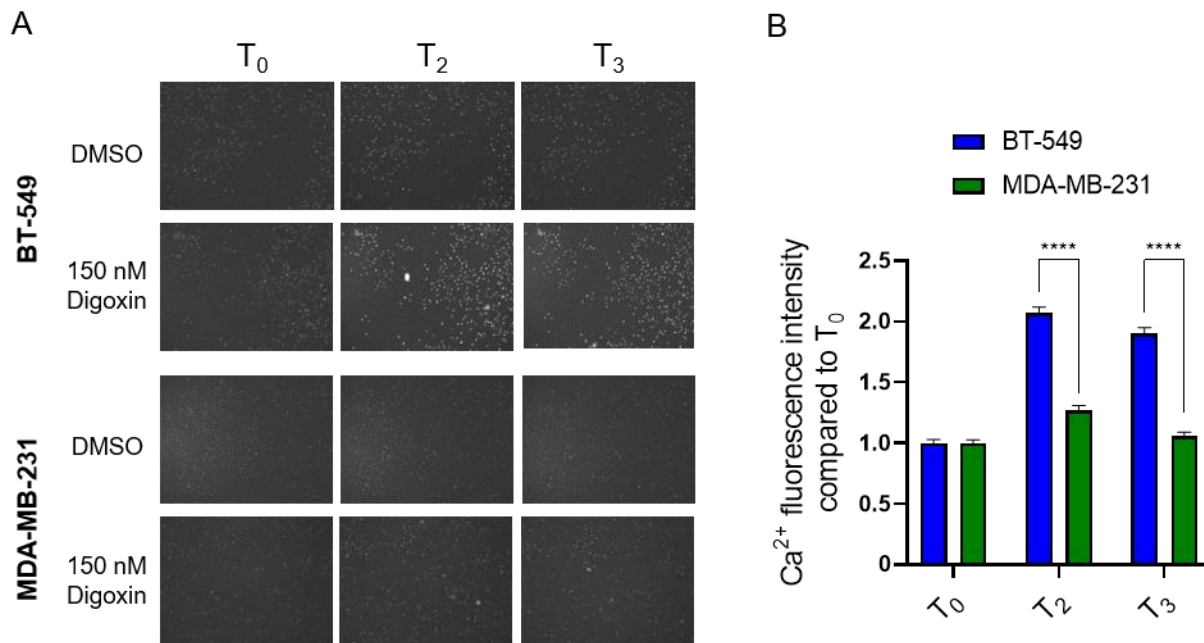

**Figure S4.** Effects of digoxin on intracellular Ca<sup>2+</sup> concentrations. A) Images of the same fields of BT-549 and MDA-MB-231 cells at indicated time points loaded with Cal520-AM and treated as indicated. B) Quantification of cellular Ca<sup>2+</sup> fluorescence in BT-549 and MDA-MB-231 cells treated with 150 nM digoxin corresponding to images in A. Significance was determined by comparing cellular Ca<sup>2+</sup> fluorescence in BT-549 cells to MDA-MB-231 cells at each time point by two-way ANOVA with Bonferoni's post hoc test,  $n = 355-591$  cells, \*\*\*\*  $p < 0.0001$ .

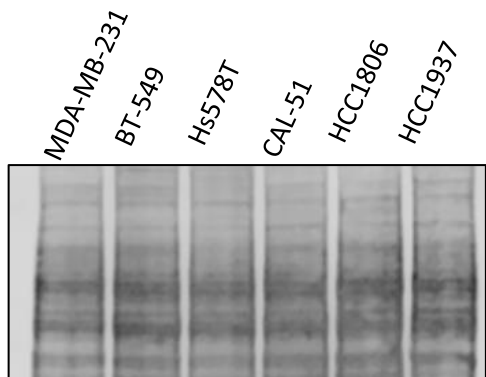

Total protein Figure 5A

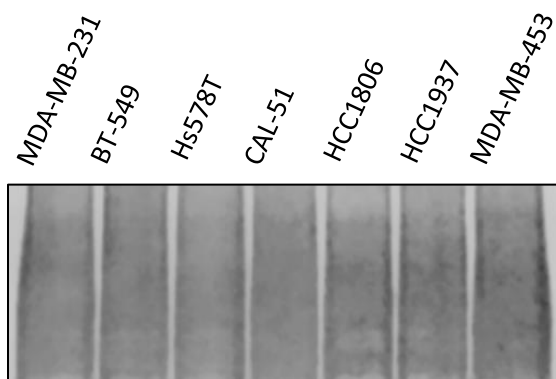

Total protein Figure 5C

**Figure S5.** Total protein stain for immunoblots in Figure 5.

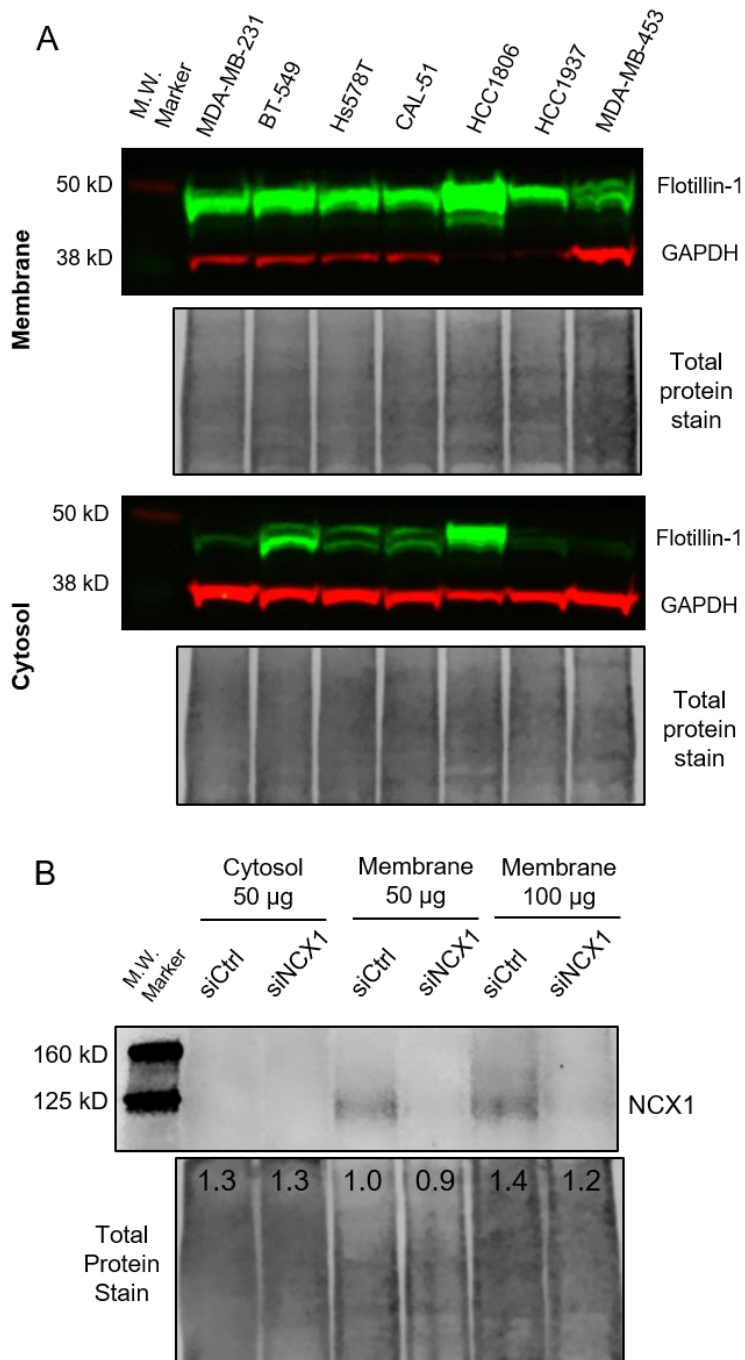

**Figure S6.** Validation of membrane enrichment and NCX1 antibody A) Western blots of membrane and cytosol fractions from TNBC cell lysates for flotillin-1, a protein localized to membranes and GAPDH, a cytosolic protein. B) Validation of NCX1 antibody specificity in membrane-enriched cell lysates from BT-549 cells 48 h after transfection with non-targeting control siRNA or NCX- targeted siRNA pool.

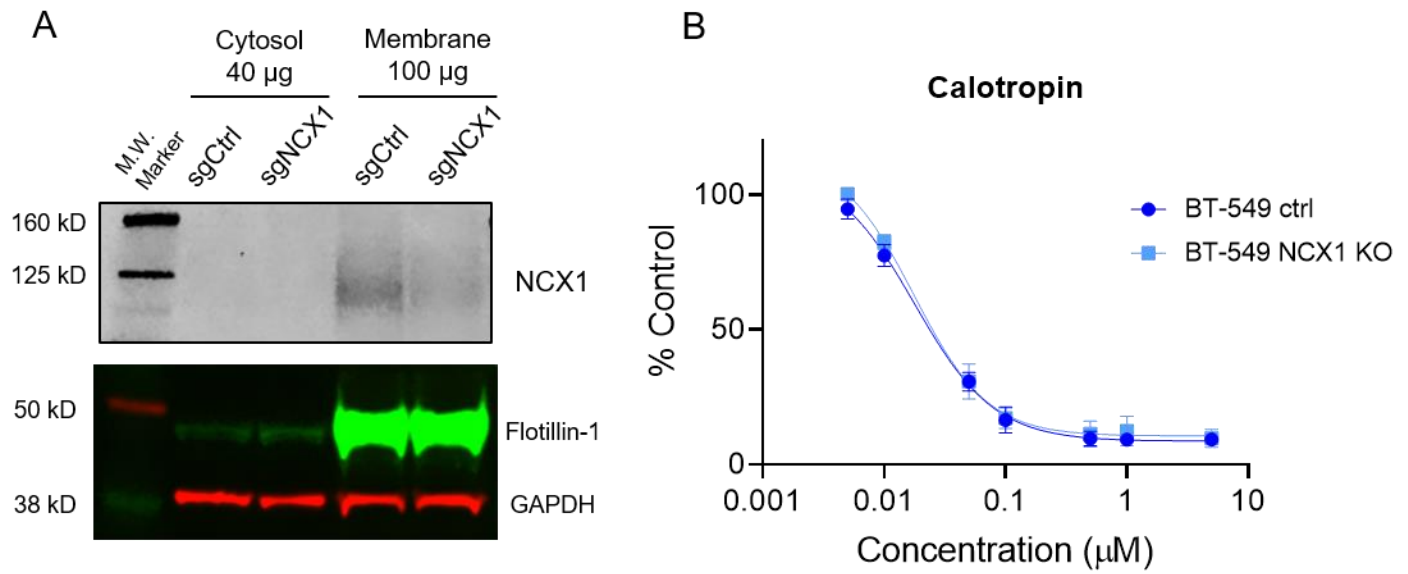

**Figure S7.** Effect of CRISPR knockout of NCX1 on BT-549 sensitivity to calotropin. BT-549 cells expressing doxycycline-inducible Cas9 were transfected with either non-targeting ctrl sgRNA or a pool of 3 sgRNAs targeting NCX1 in the presence of 50 ng/ml doxycycline. Cells were harvested 48 h later and used for either membrane enrichment and NCX1 western blot to validate knockout (A) or plated in a 96-well plate to evaluate calotropin cytotoxicity using the SRB assay (B).

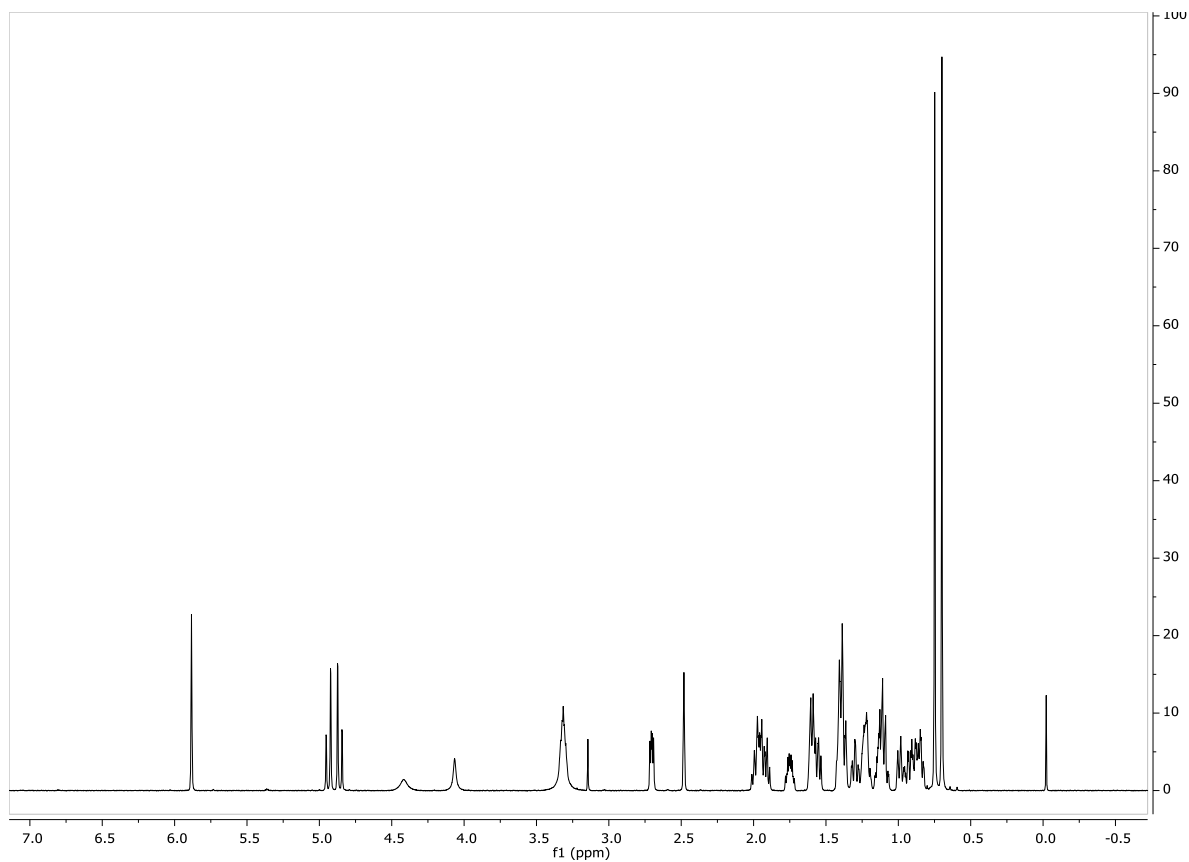

**Figure S8.**  $^1\text{H}$  NMR (600 MHz) spectrum of uzarigenin (**1**) in  $\text{DMSO-}d_6$

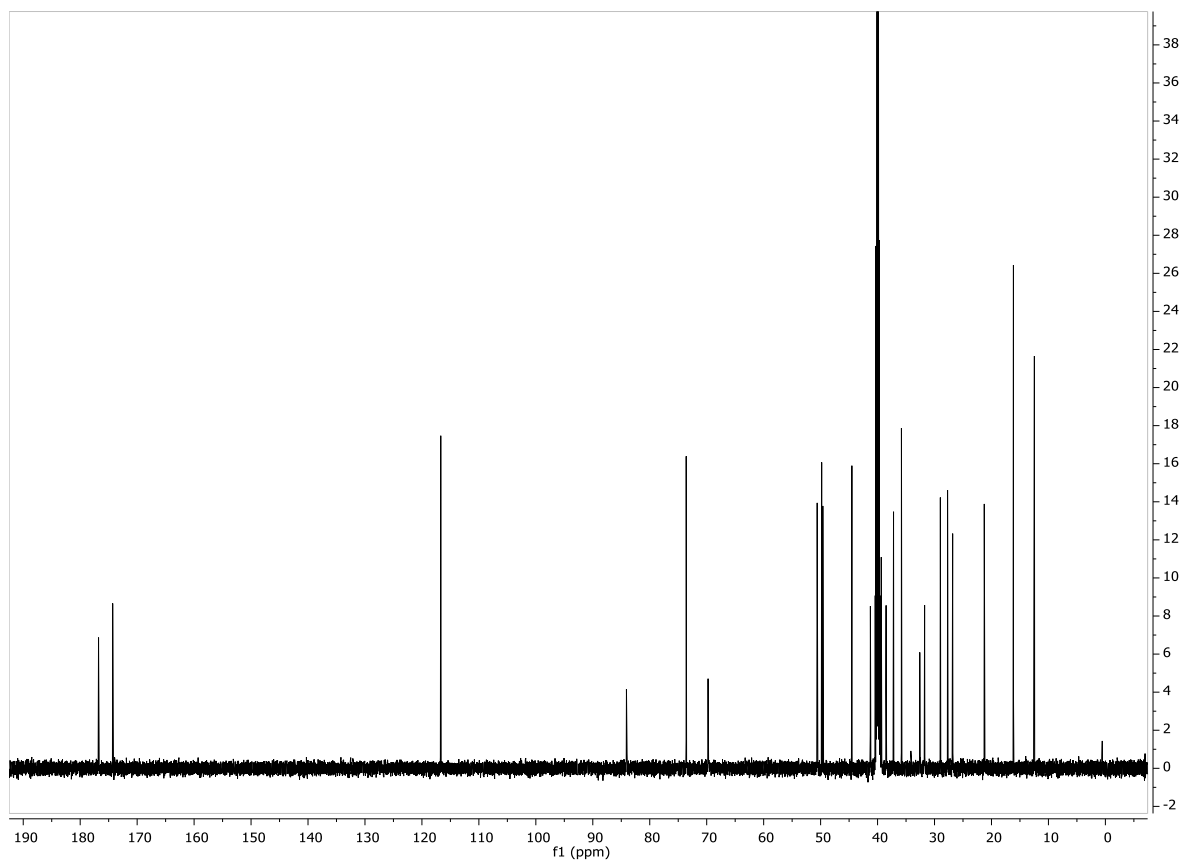

**Figure S9.**  $^{13}\text{C}$  NMR (150 MHz) spectrum of uzarigenin (**1**) in  $\text{DMSO-}d_6$

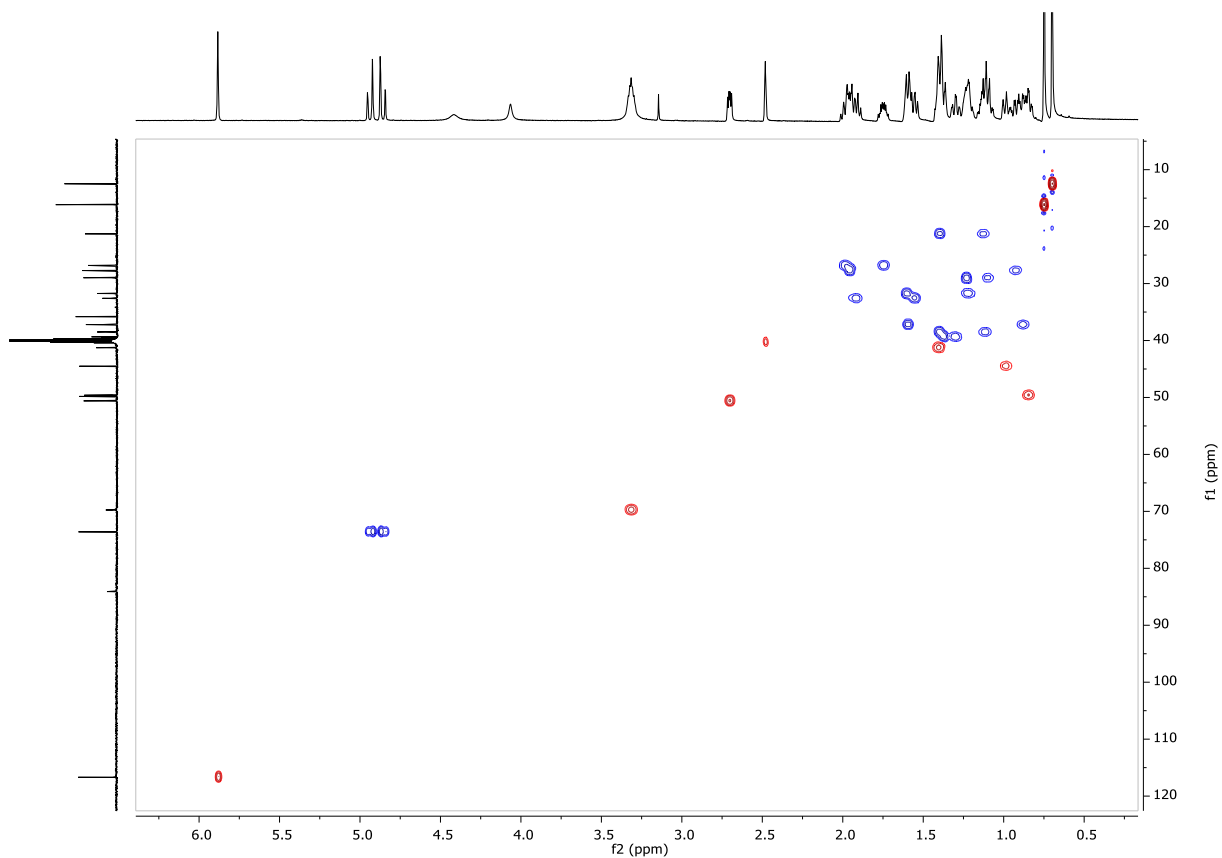

**Figure S10.** HSQC (500 MHz) spectrum of uzarigenin (**1**) in DMSO-*d*<sub>6</sub>

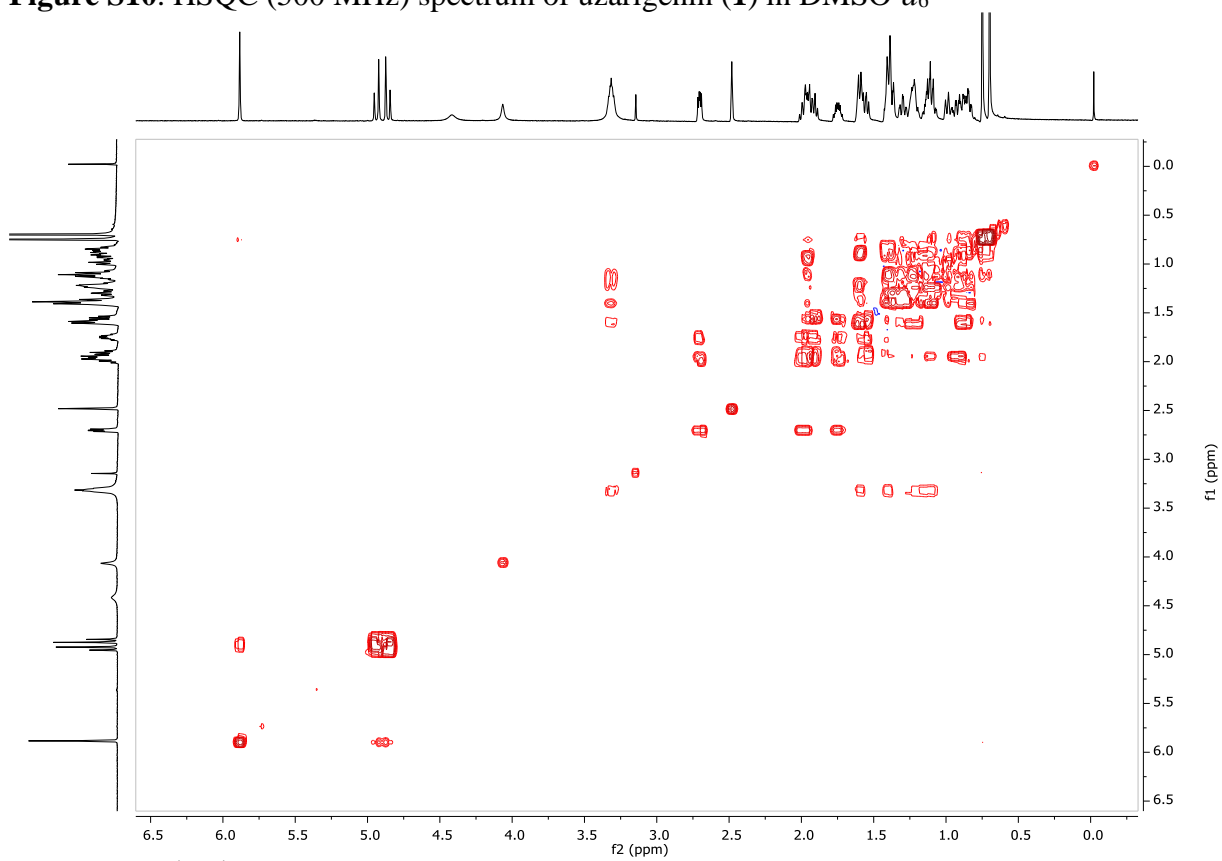

**Figure S11.** <sup>1</sup>H-<sup>1</sup>H COSY (500 MHz) spectrum of uzarigenin (**1**) in DMSO-*d*<sub>6</sub>



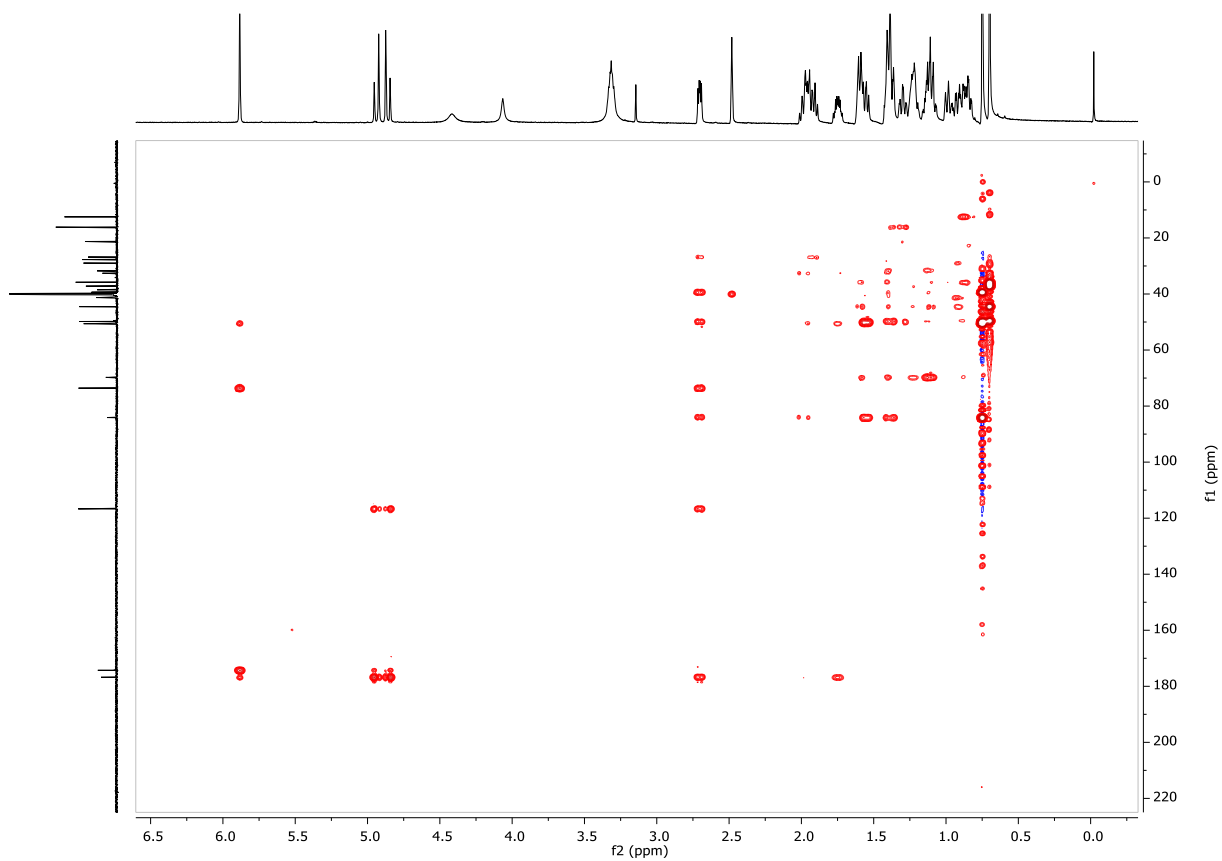

**Figure S12.** HMBC (500 MHz) spectrum of uzarigenin (**1**) in DMSO- $d_6$

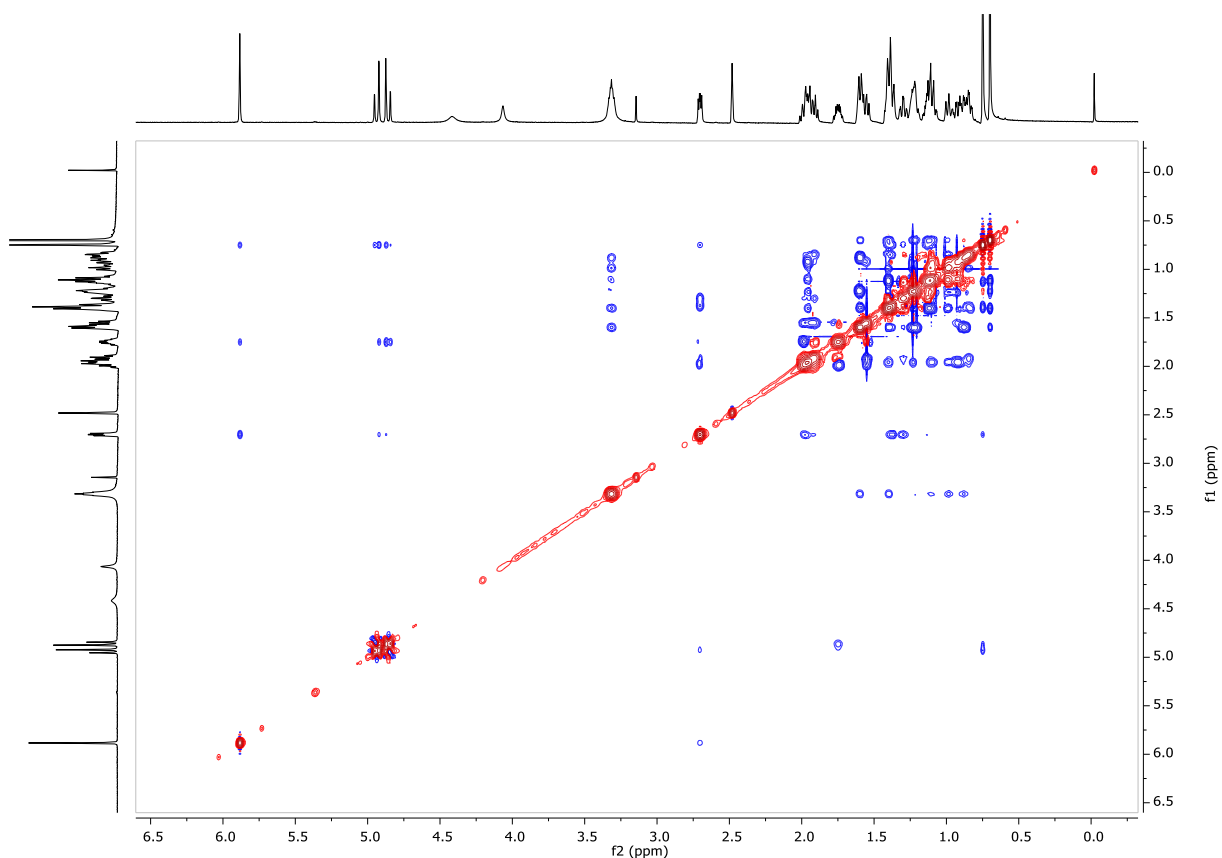

**Figure S13.** ROESY (500 MHz) spectrum of uzarigenin (**1**) in DMSO- $d_6$

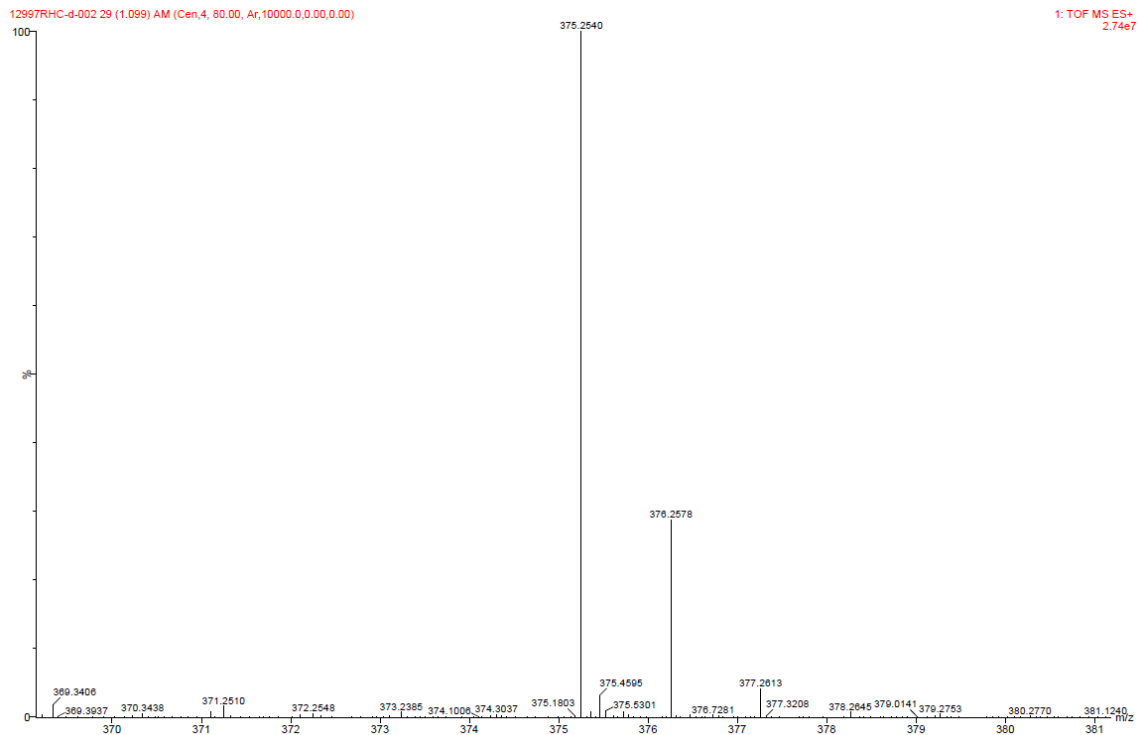

**Figure S14.** HRESIMS spectrum of uzarigenin (**1**)

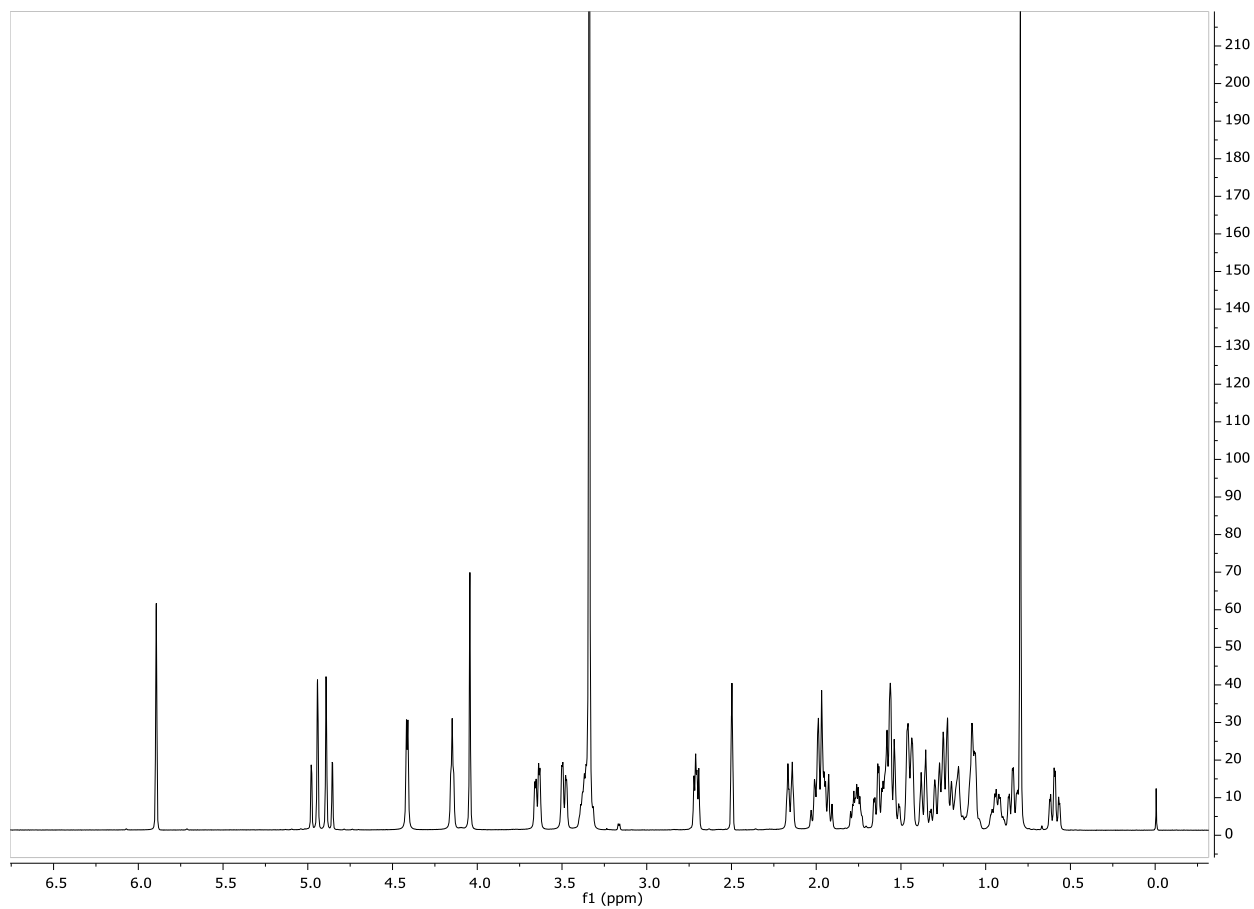

**Figure S15.**  $^1\text{H}$  NMR (500 MHz) spectrum of coroglaucigenin (**2**) in  $\text{DMSO-}d_6$

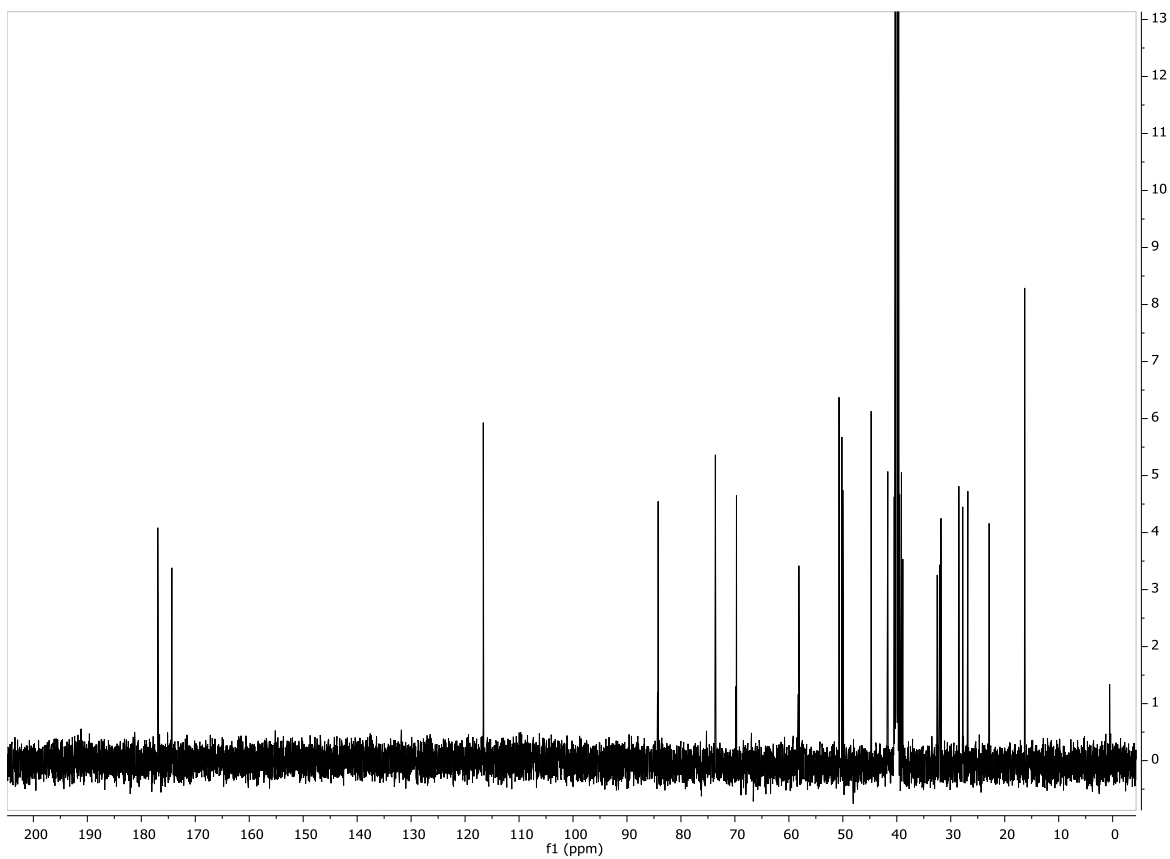

**Figure S16.**  $^{13}\text{C}$  NMR (125 MHz) spectrum of coroglaucigenin (**2**) in  $\text{DMSO-}d_6$

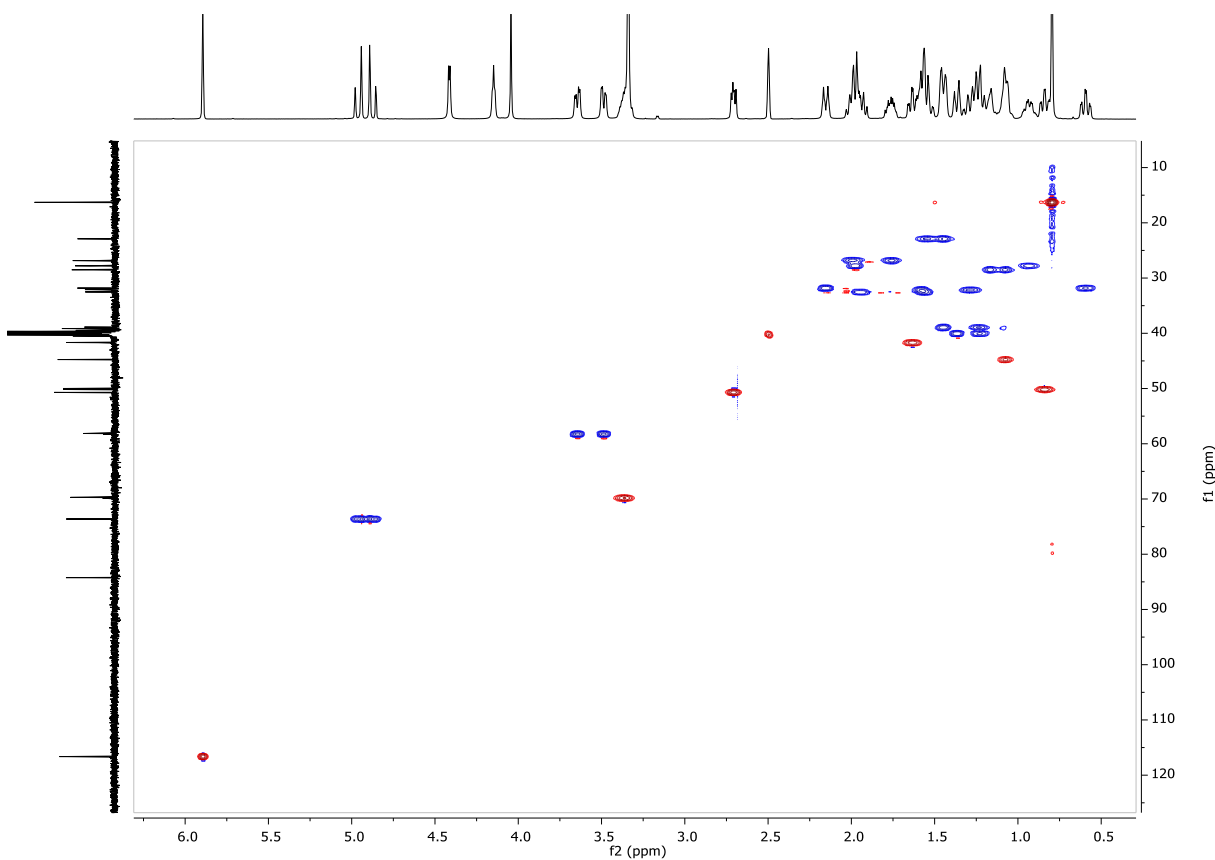

**Figure S17.** HSQC (500 MHz) spectrum of coroglaucigenin (**2**) in  $\text{DMSO-}d_6$

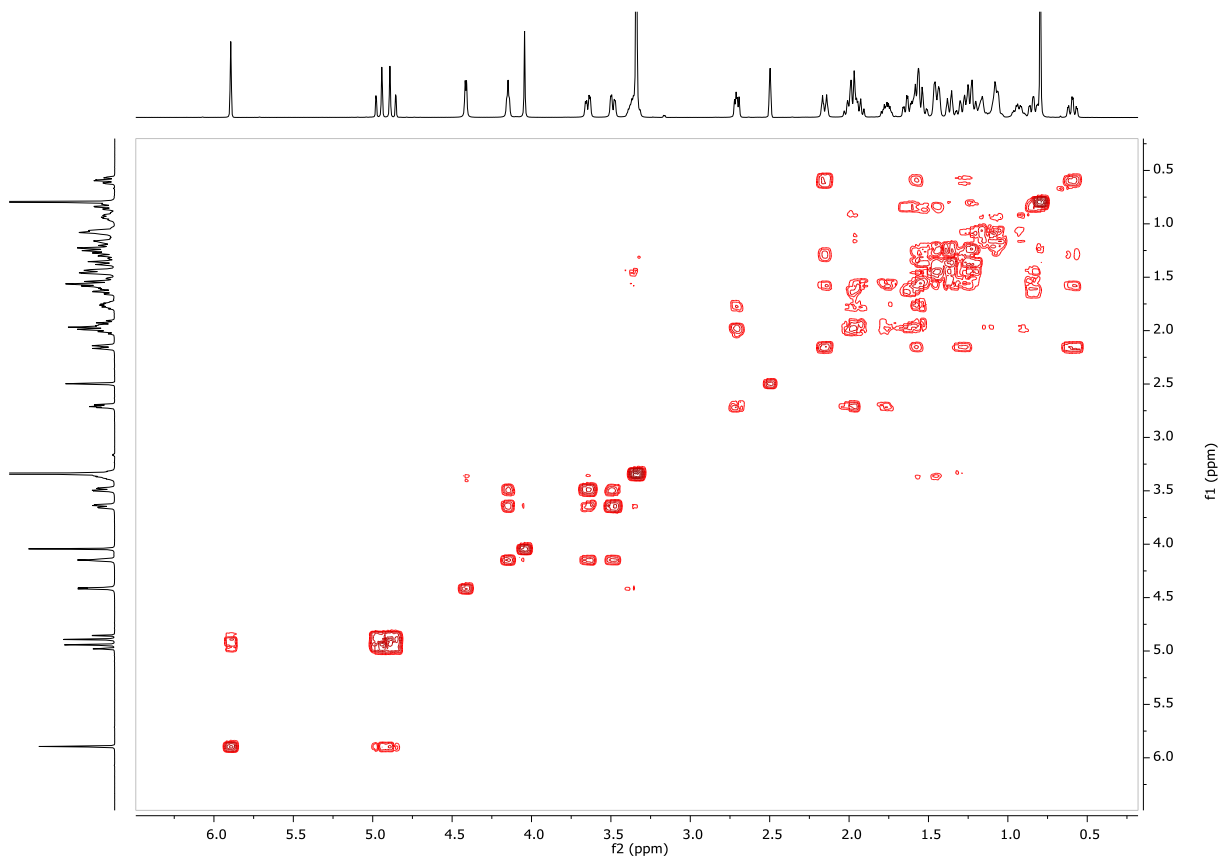

**Figure S18.**  $^1\text{H}$ - $^1\text{H}$  COSY (500 MHz) spectrum of coroglaucigenin (**2**) in  $\text{DMSO-}d_6$

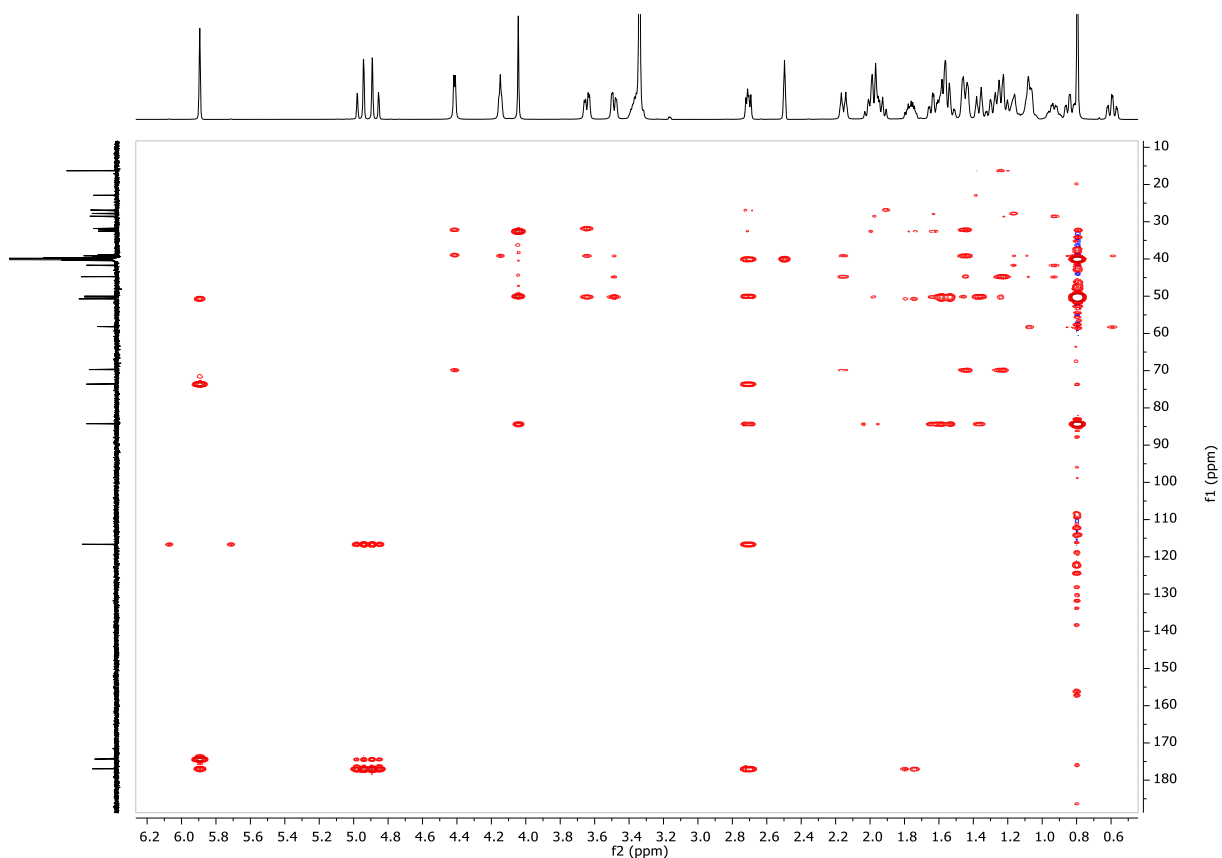

**Figure S19.** HMBC (500 MHz) spectrum of coroglaucigenin (**2**) in  $\text{DMSO-}d_6$

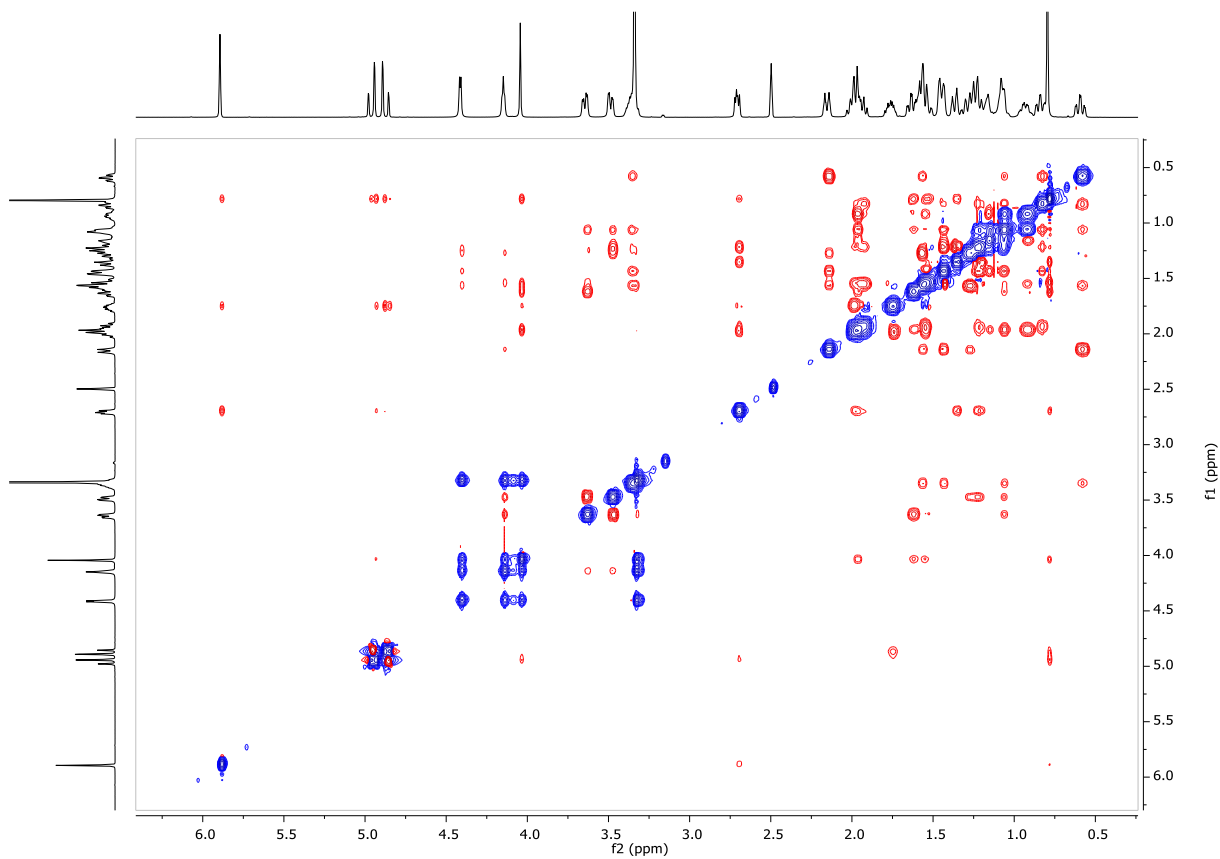

**Figure S20.** ROESY (500 MHz) spectrum of coroglaucigenin (**2**) in DMSO- $d_6$

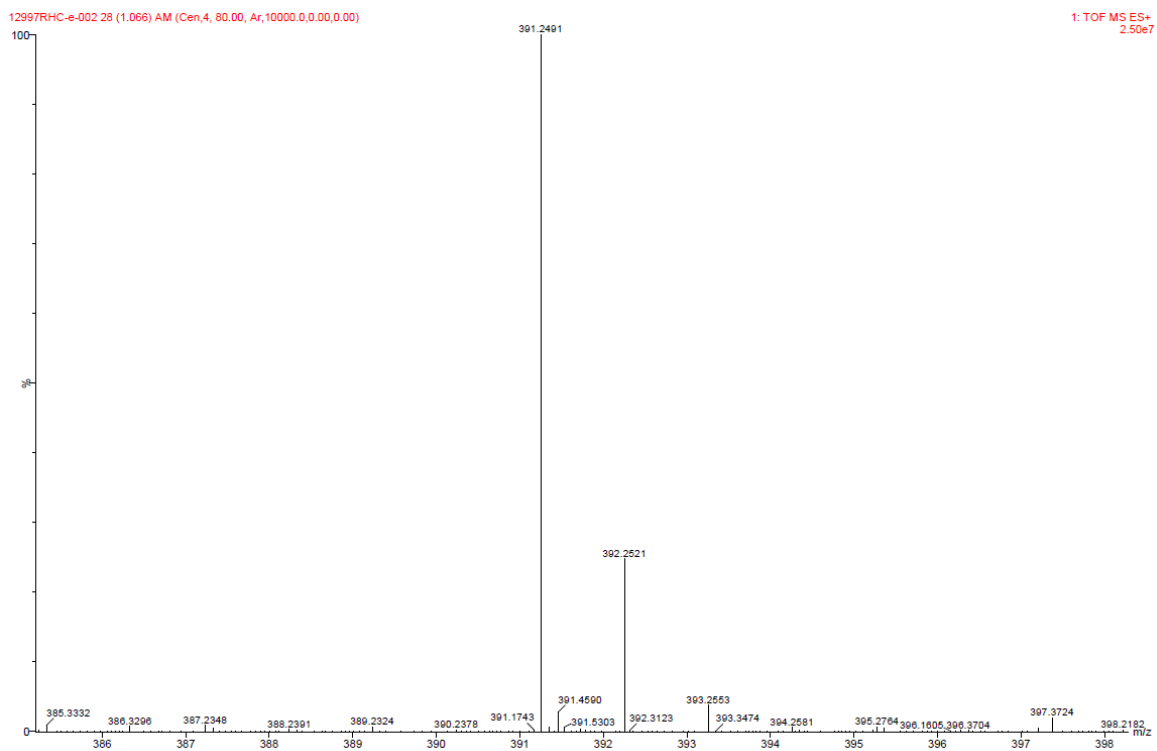

**Figure S21.** HRESIMS spectrum of coroglaucigenin (**2**)

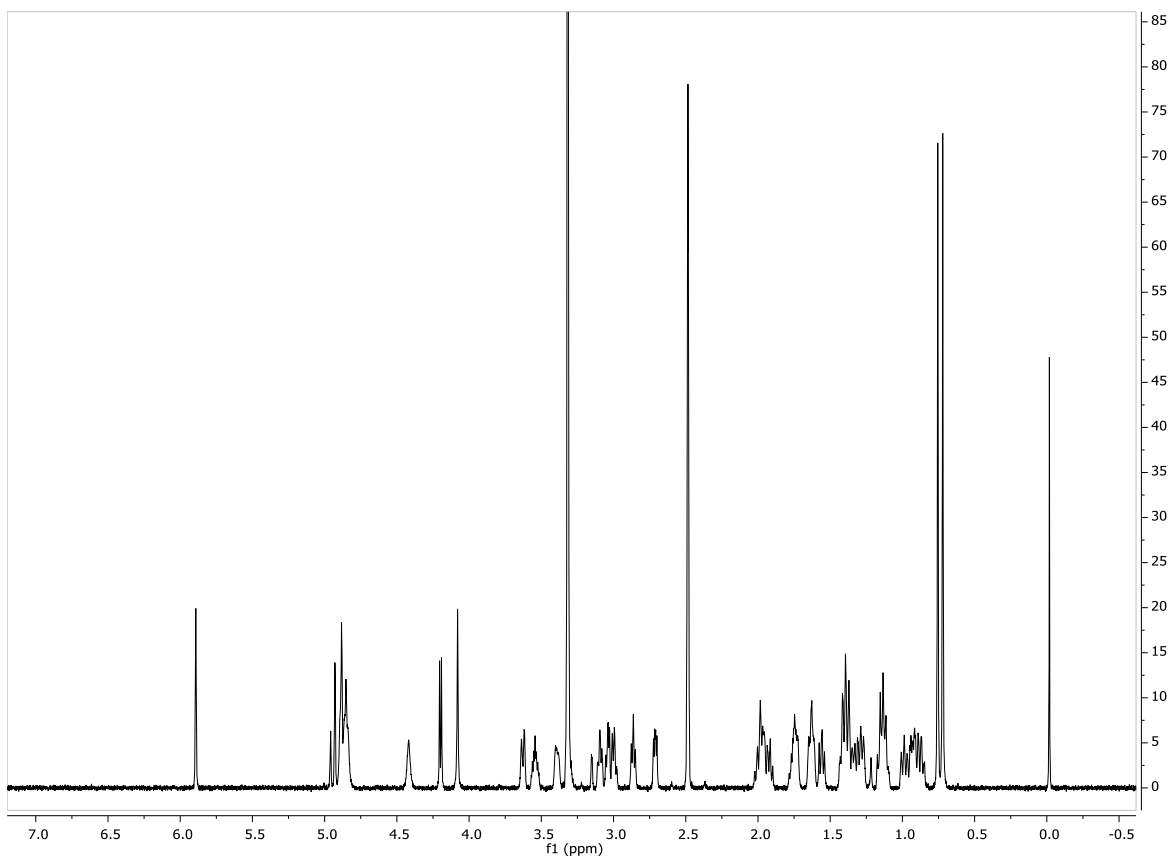

**Figure S22.**  $^1\text{H}$  NMR (600 MHz) spectrum of desglucouzarin (**3**) in  $\text{DMSO-}d_6$

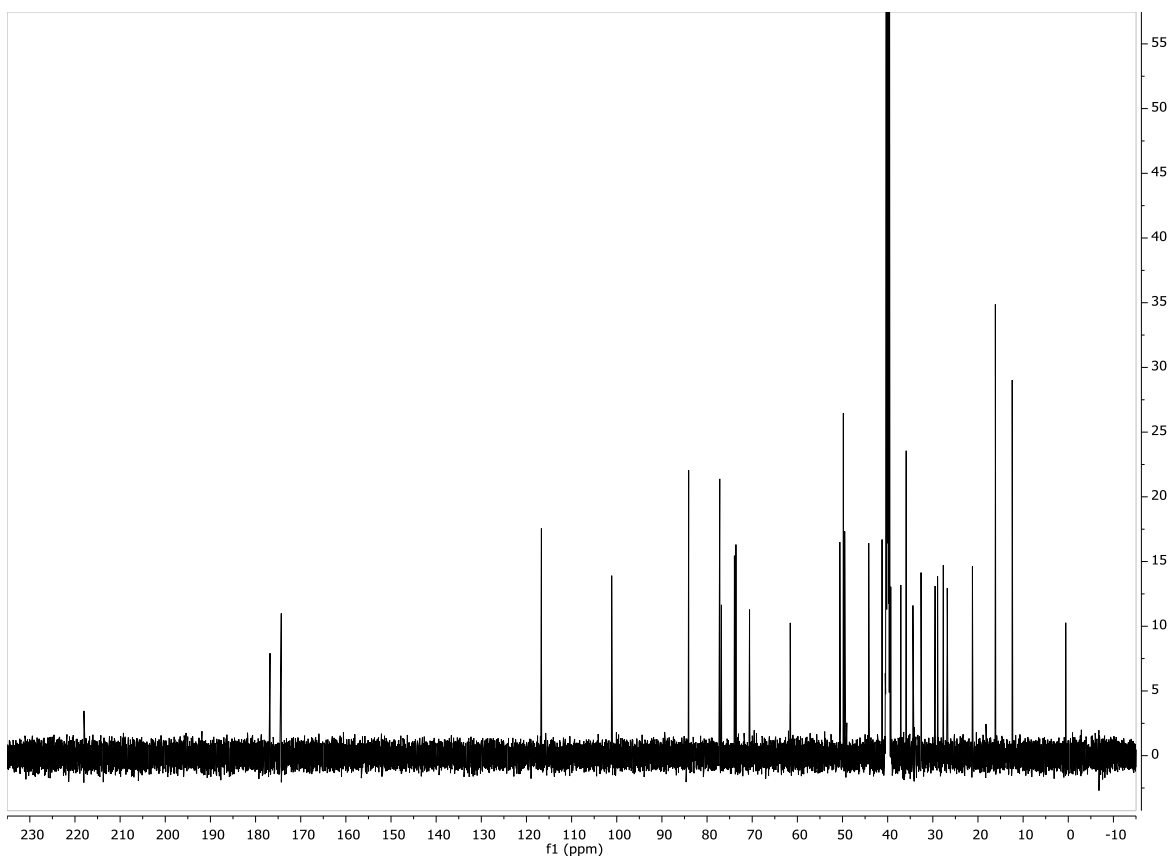

**Figure S23.**  $^{13}\text{C}$  NMR (150 MHz) spectrum of desglucouzarin (**3**) in  $\text{DMSO-}d_6$

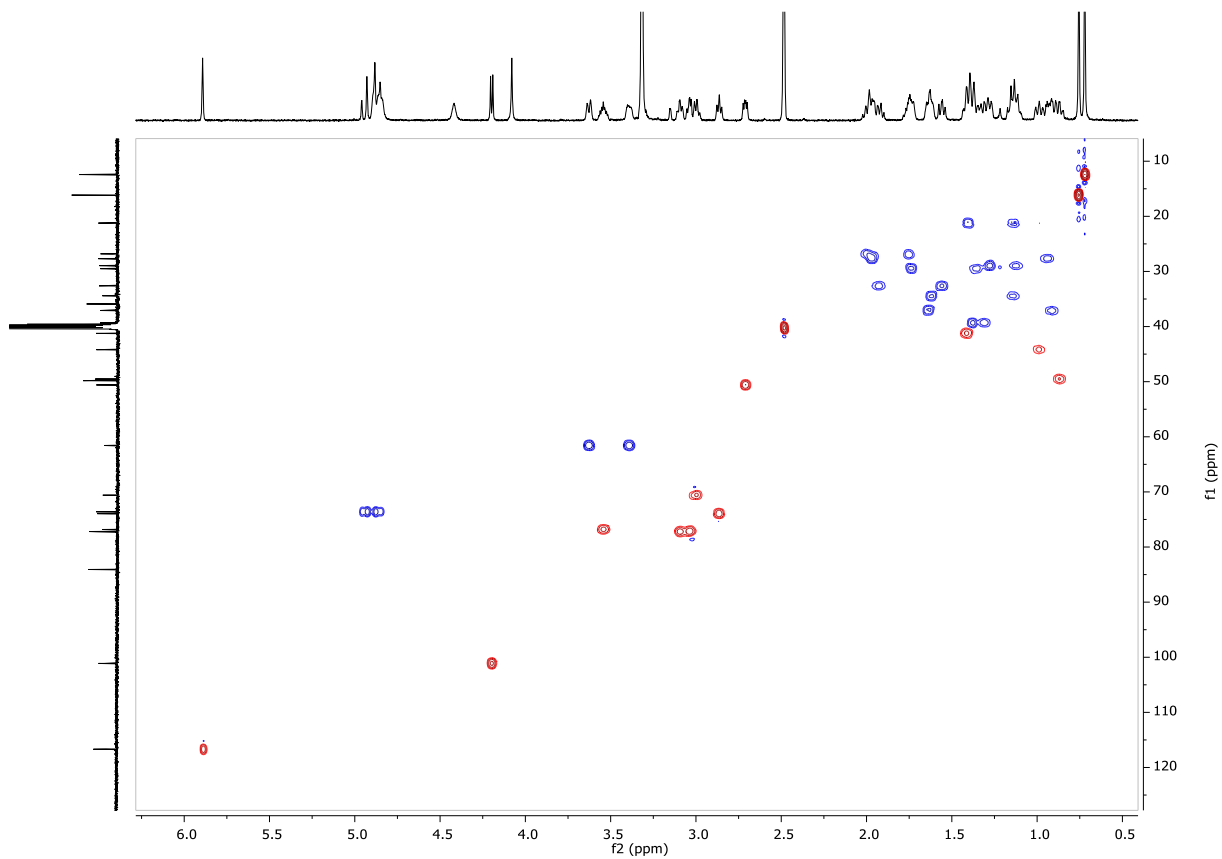

**Figure S24.** HSQC (500 MHz) spectrum of desglucouzarin (**3**) in DMSO-*d*<sub>6</sub>

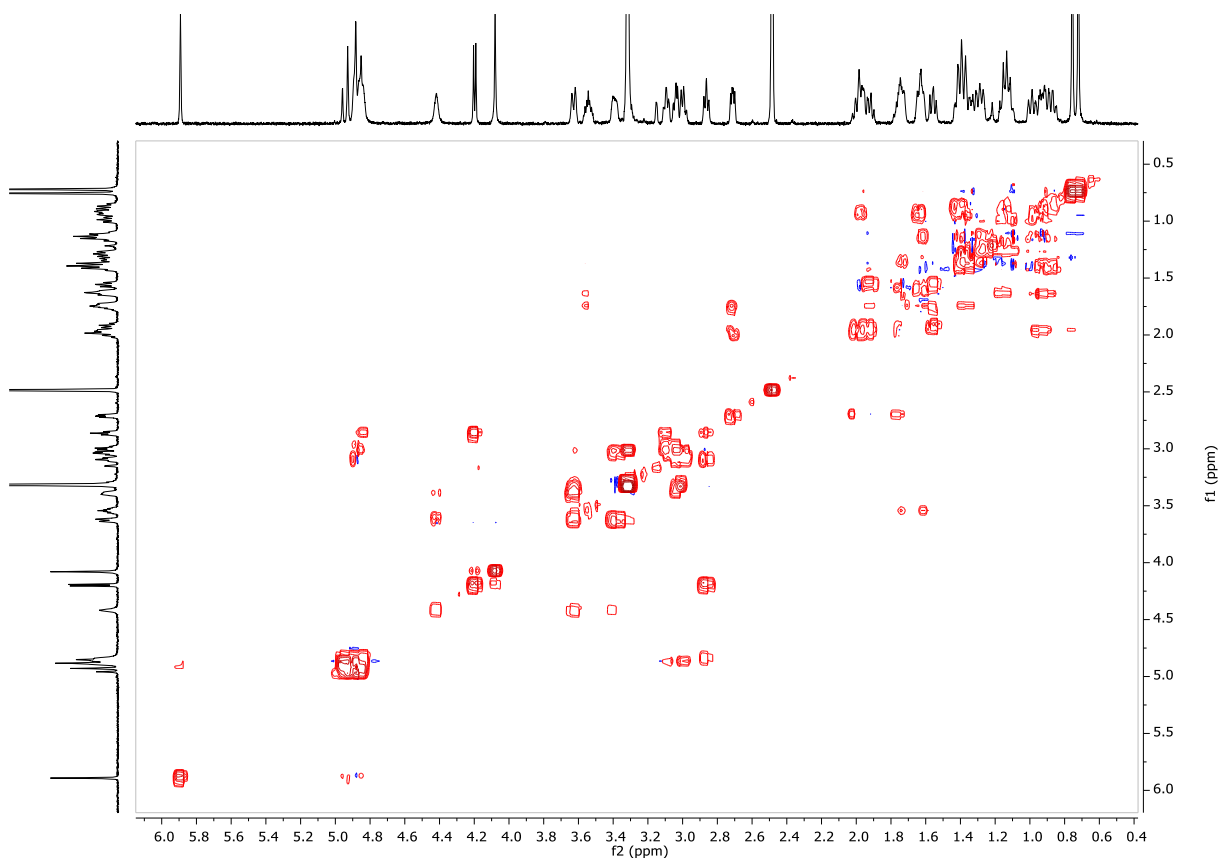

**Figure S25.** <sup>1</sup>H-<sup>1</sup>H COSY (500 MHz) spectrum of desglucouzarin (**3**) in DMSO-*d*<sub>6</sub>

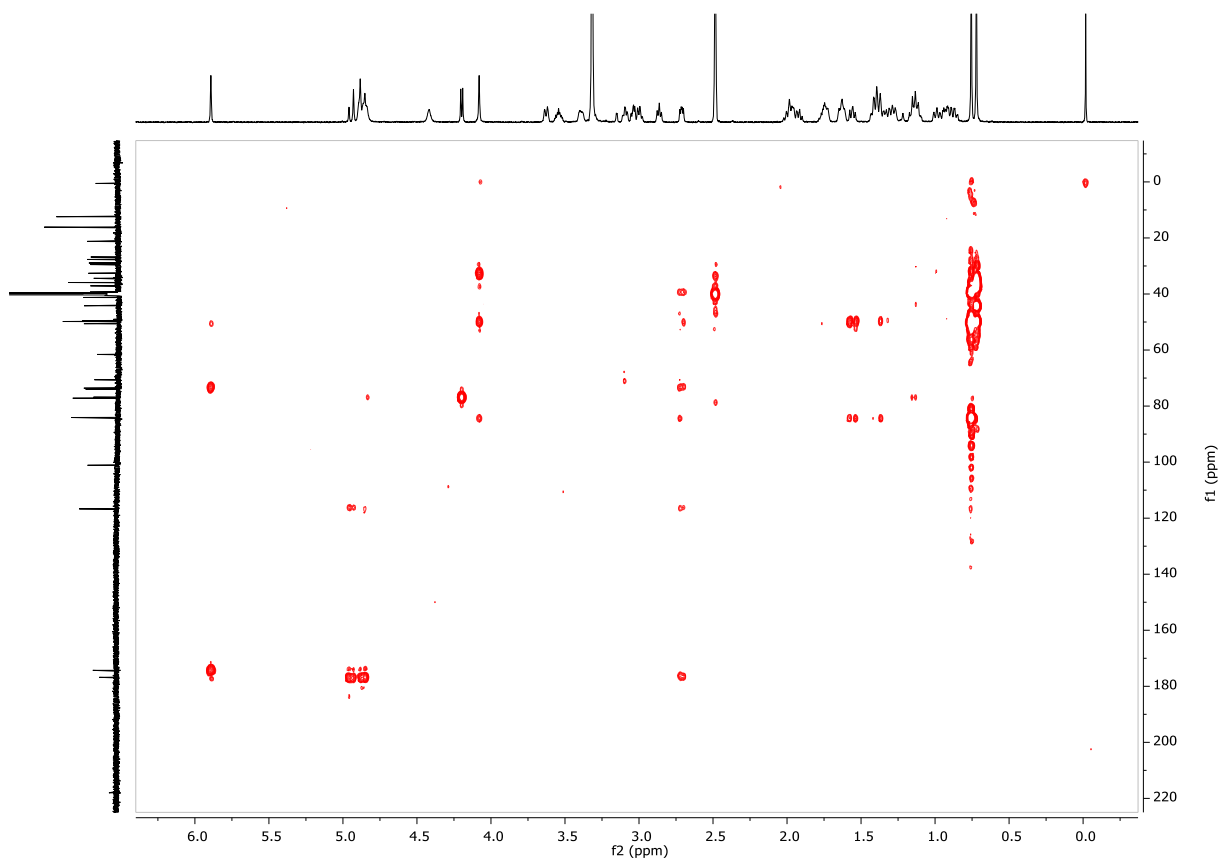

**Figure S26.** HMBC (500 MHz) spectrum of desglucouzarin (**3**) in DMSO-*d*<sub>6</sub>

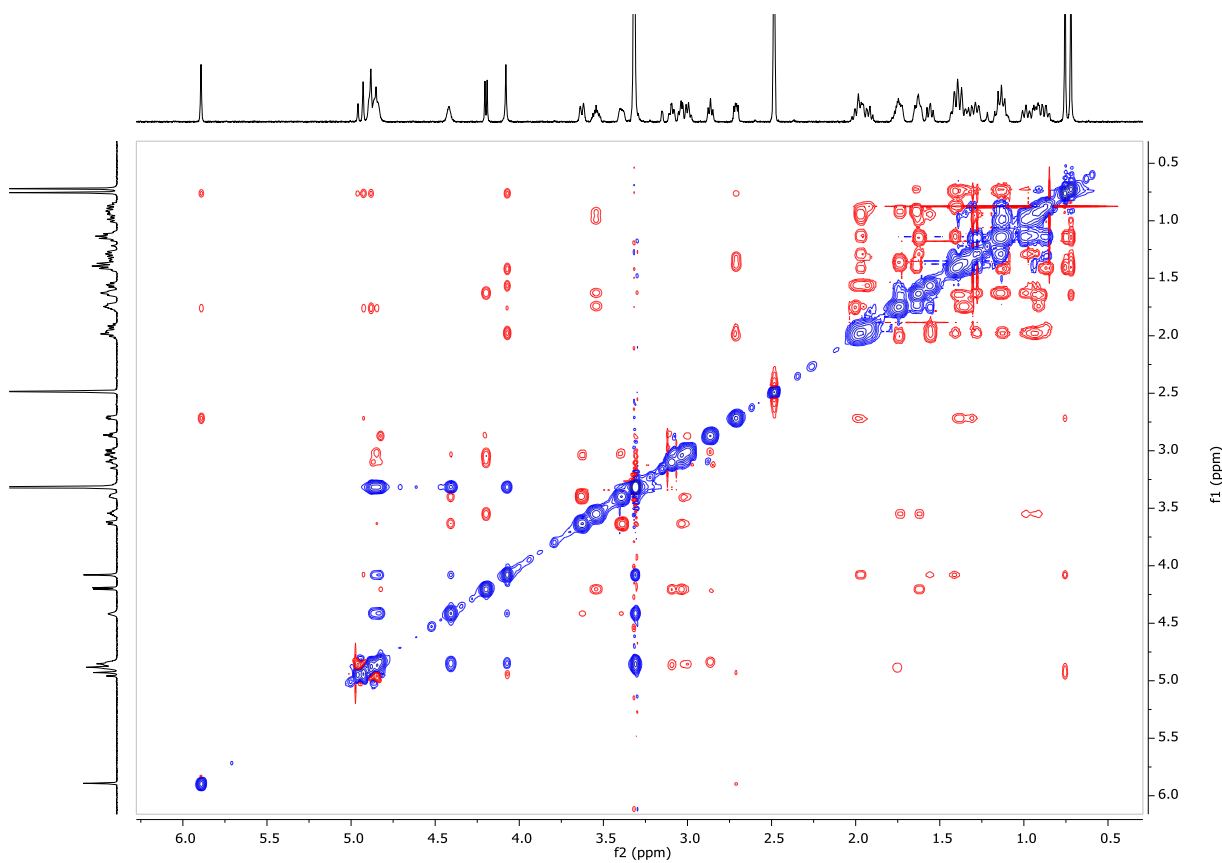

**Figure S27.** ROESY (500 MHz) spectrum of desglucouzarin (**3**) in DMSO-*d*<sub>6</sub>



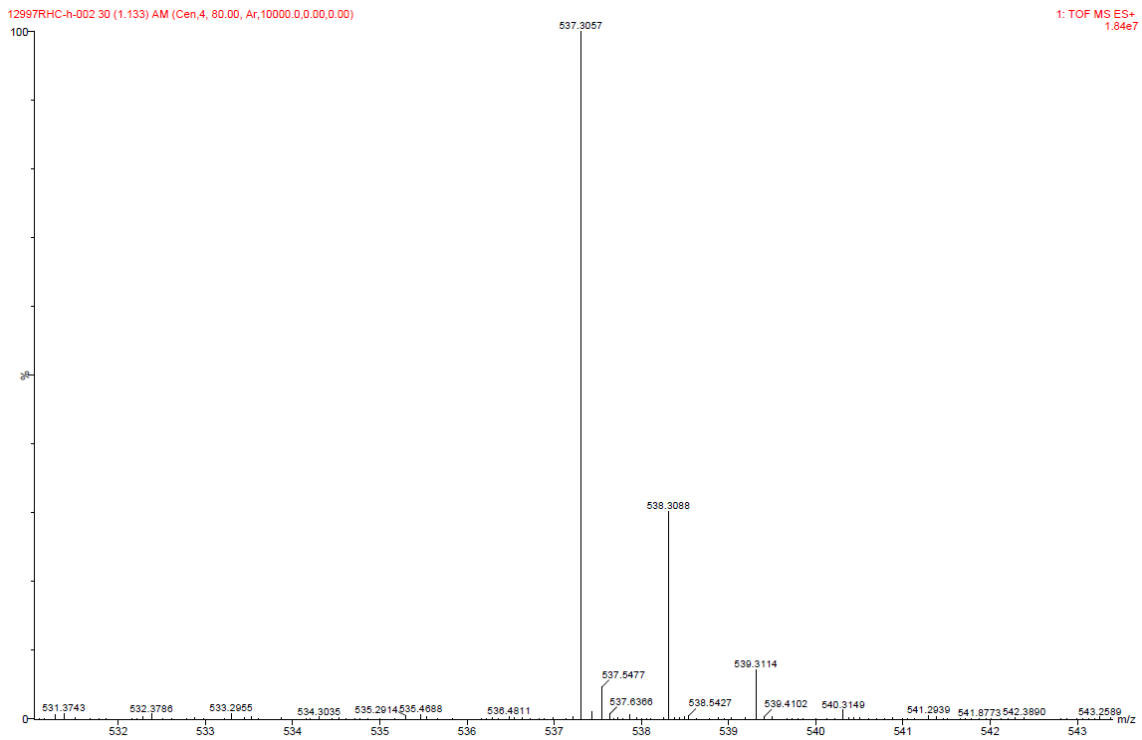

**Figure S28.** HRESIMS spectrum of desglucouzarin (**3**)

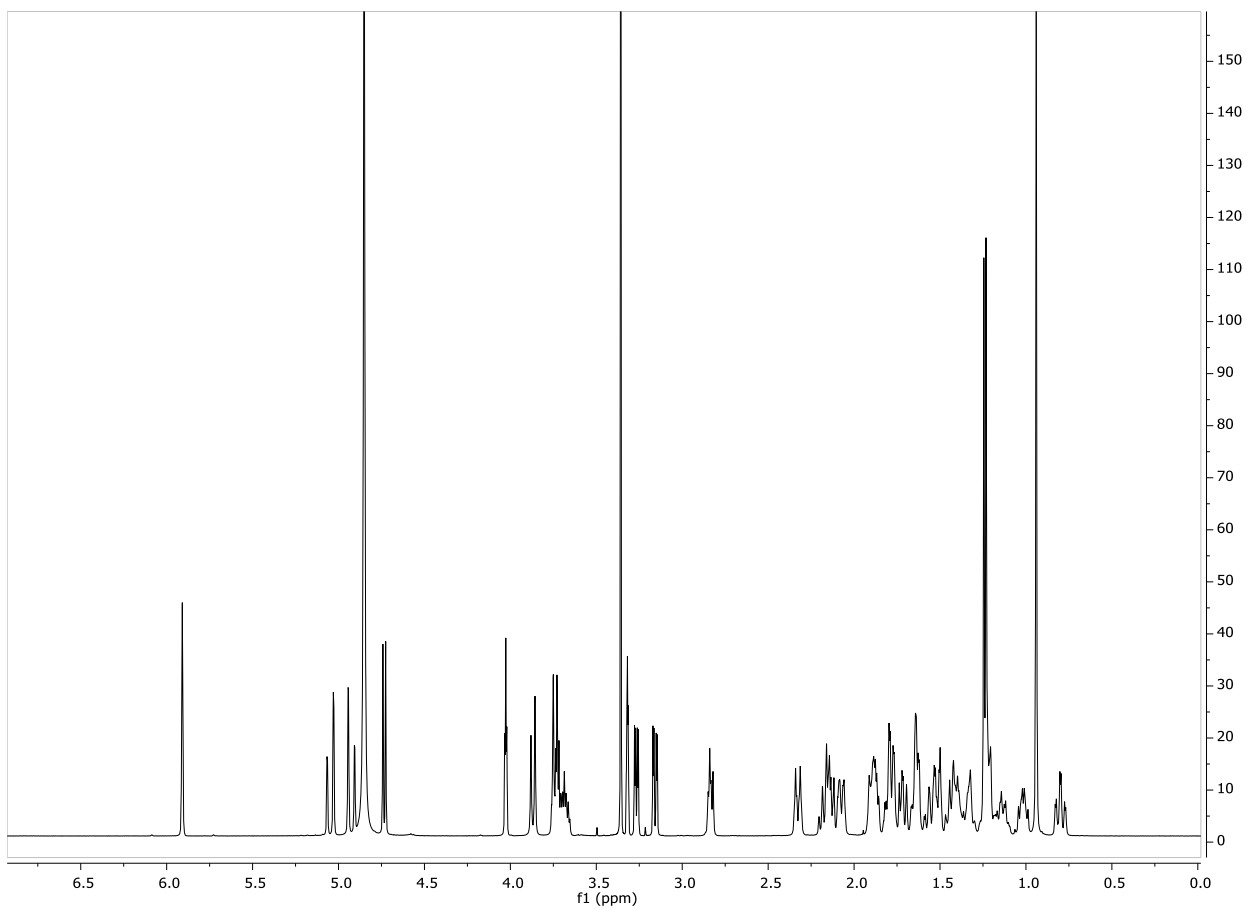

**Figure S29.**  $^1\text{H}$  NMR (500 MHz) spectrum of frugoside (**4**) in methanol- $d_4$

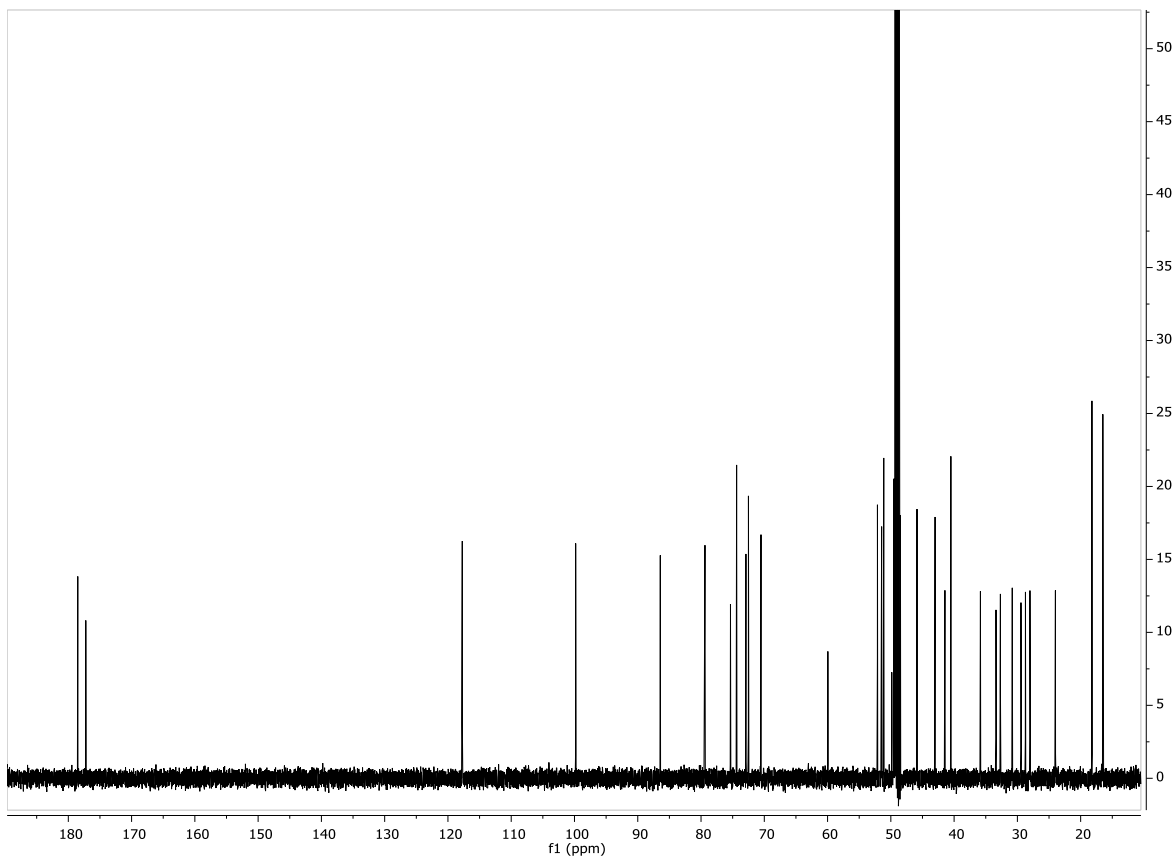

**Figure S30.**  $^{13}\text{C}$  NMR (125 MHz) spectrum of frugoside (**4**) in methanol- $d_4$

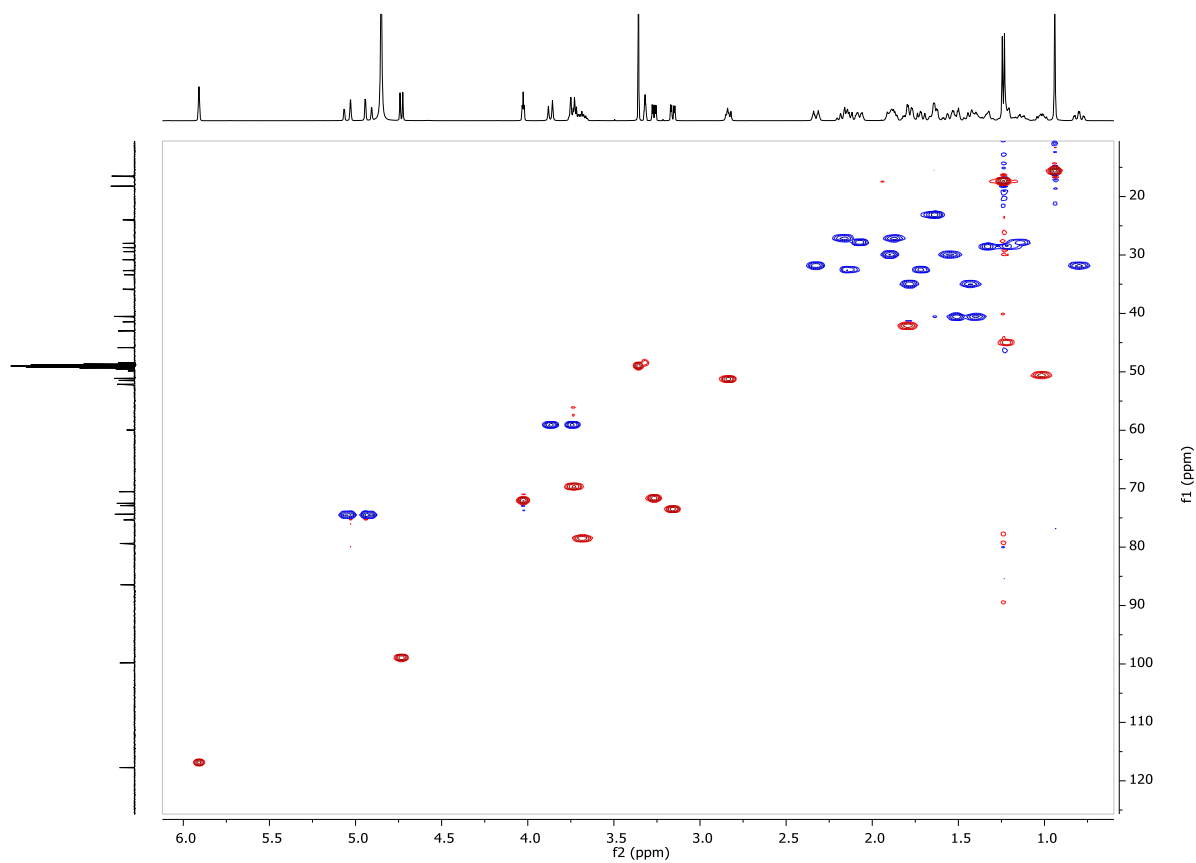

**Figure S31.** HSQC (500 MHz) spectrum of frugoside (**4**) in methanol- $d_4$

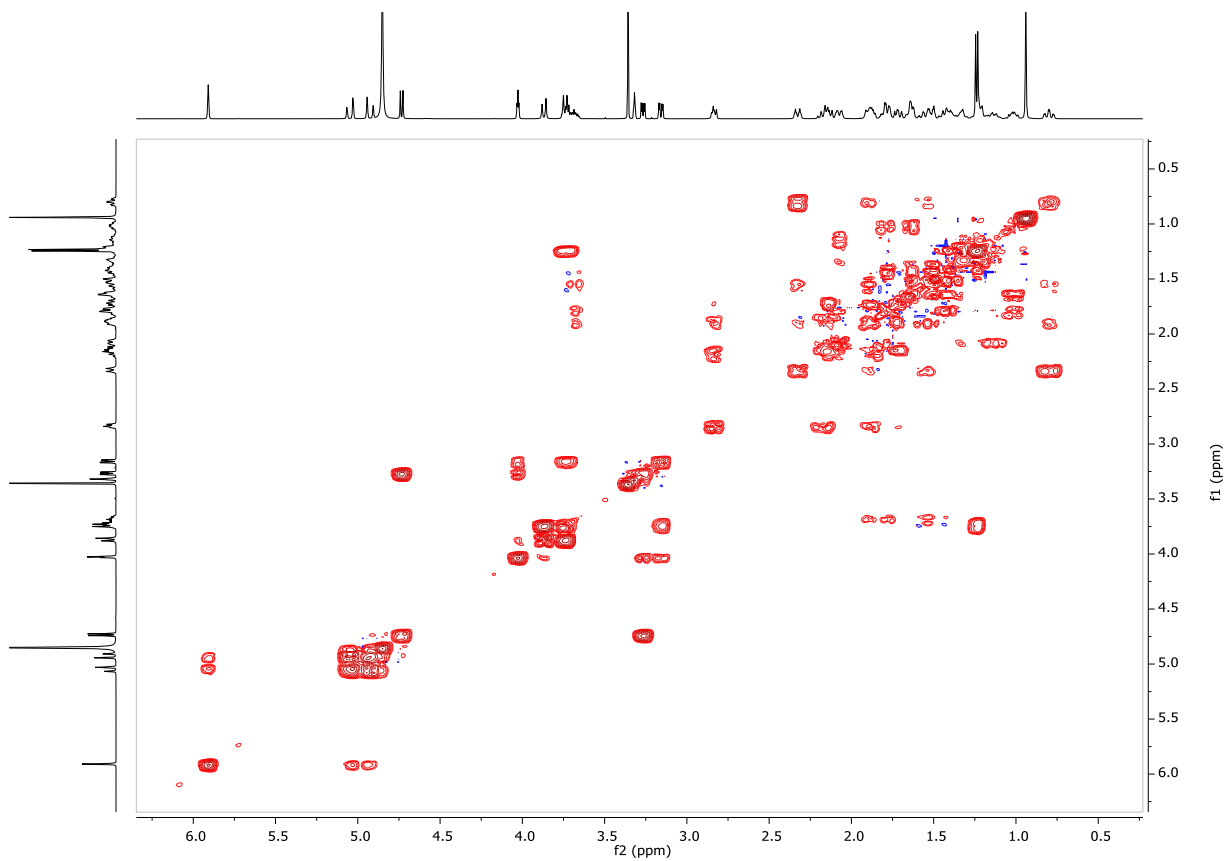

**Figure S32.**  $^1\text{H}$ - $^1\text{H}$  COSY (500 MHz) spectrum of frugoside (**4**) in methanol- $d_4$

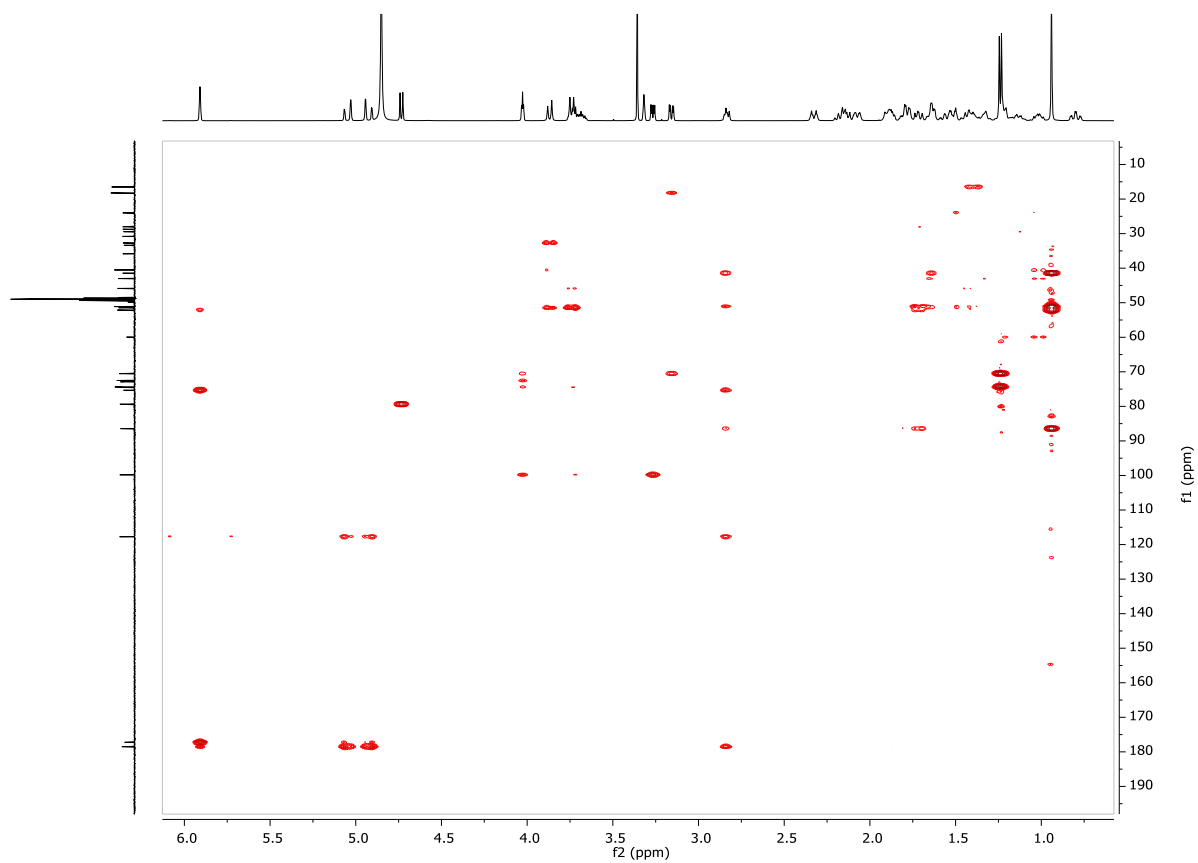

**Figure S33.** HMBC (500 MHz) spectrum of frugoside (**4**) in methanol- $d_4$

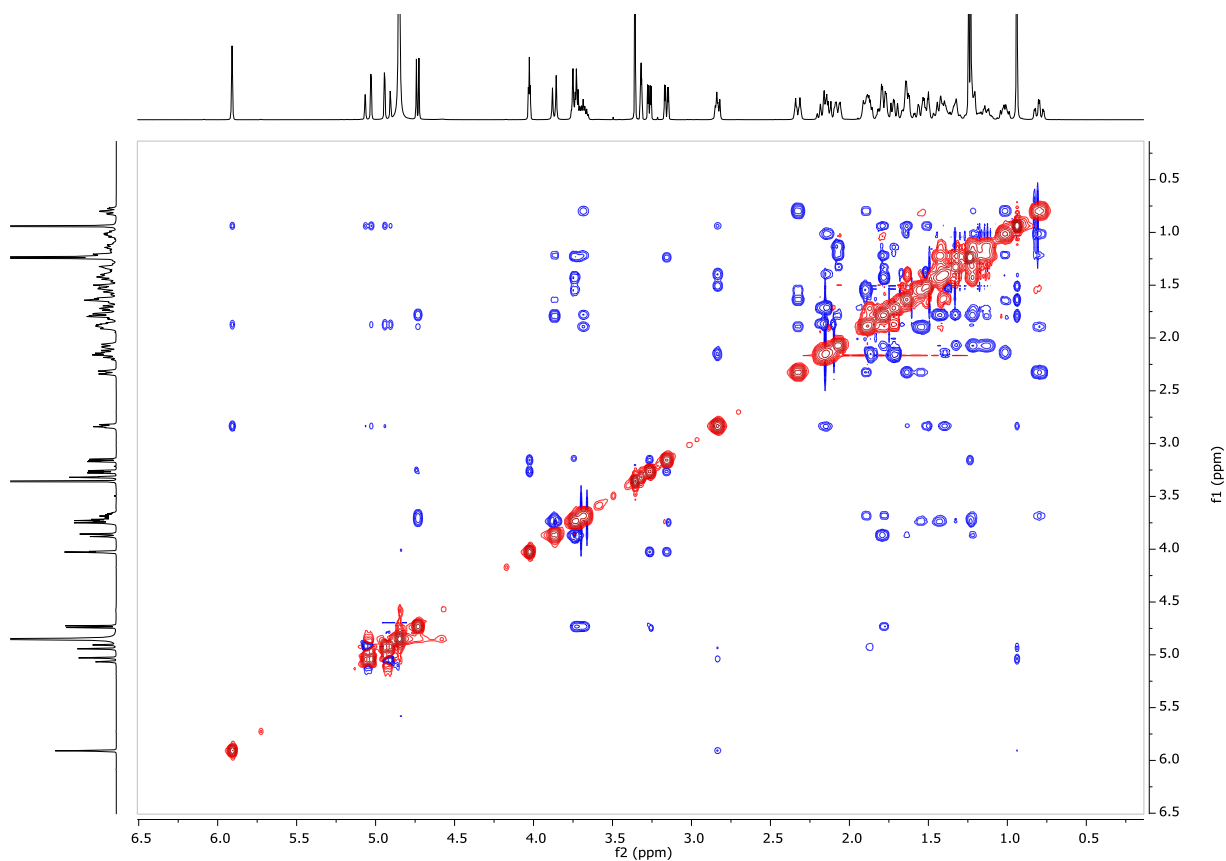

**Figure S34.** ROESY (500 MHz) spectrum of frugoside (**4**) in methanol-*d*<sub>4</sub>

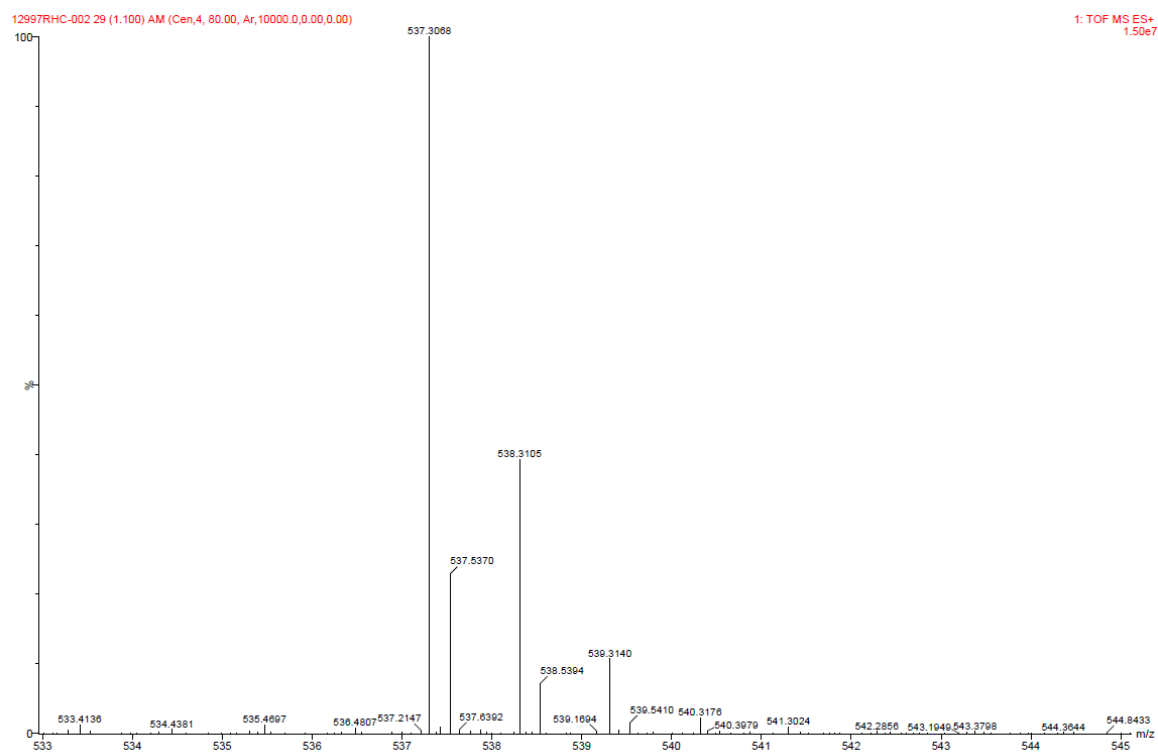

**Figure S35.** HRESIMS spectrum of frugoside (**4**)

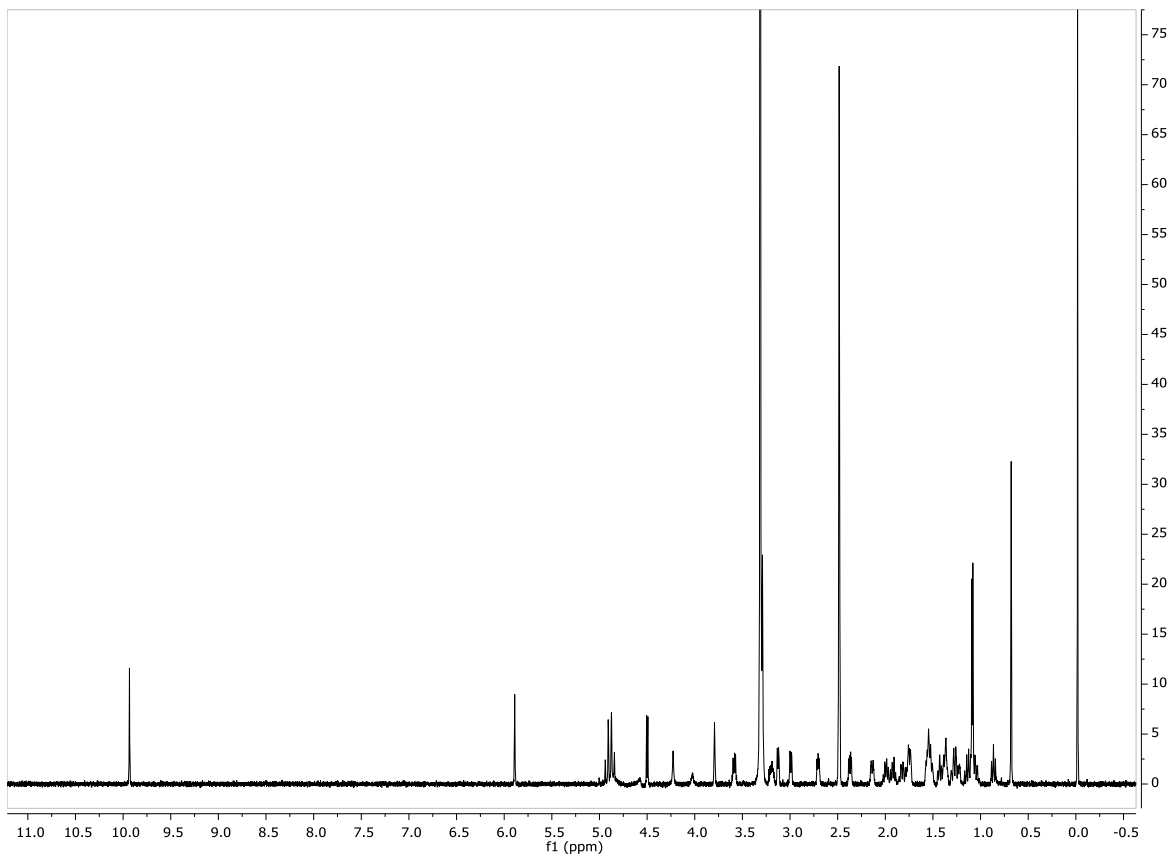

**Figure S36.**  $^1\text{H}$  NMR (600 MHz) spectrum of frugosidal (**5**) in  $\text{DMSO-}d_6$

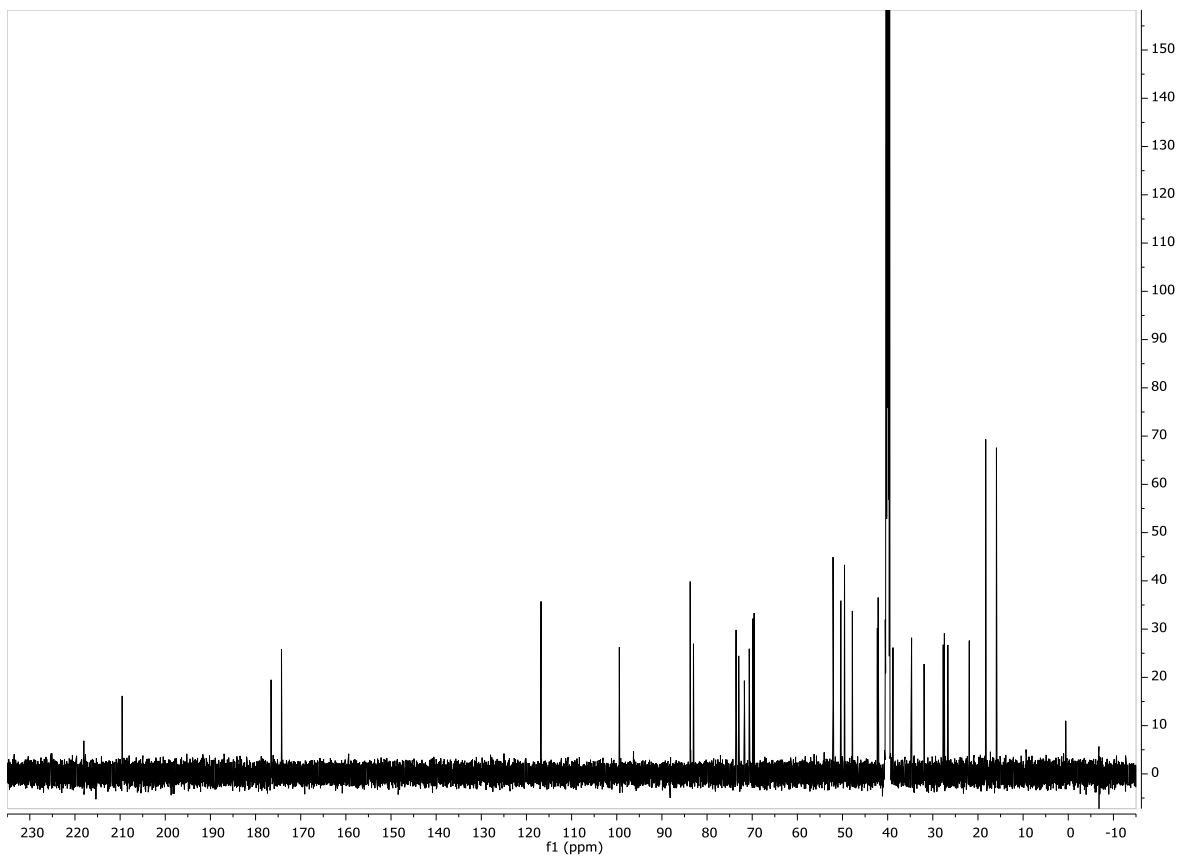

**Figure S37.**  $^{13}\text{C}$  NMR (150 MHz) spectrum of frugosidal (**5**) in  $\text{DMSO-}d_6$

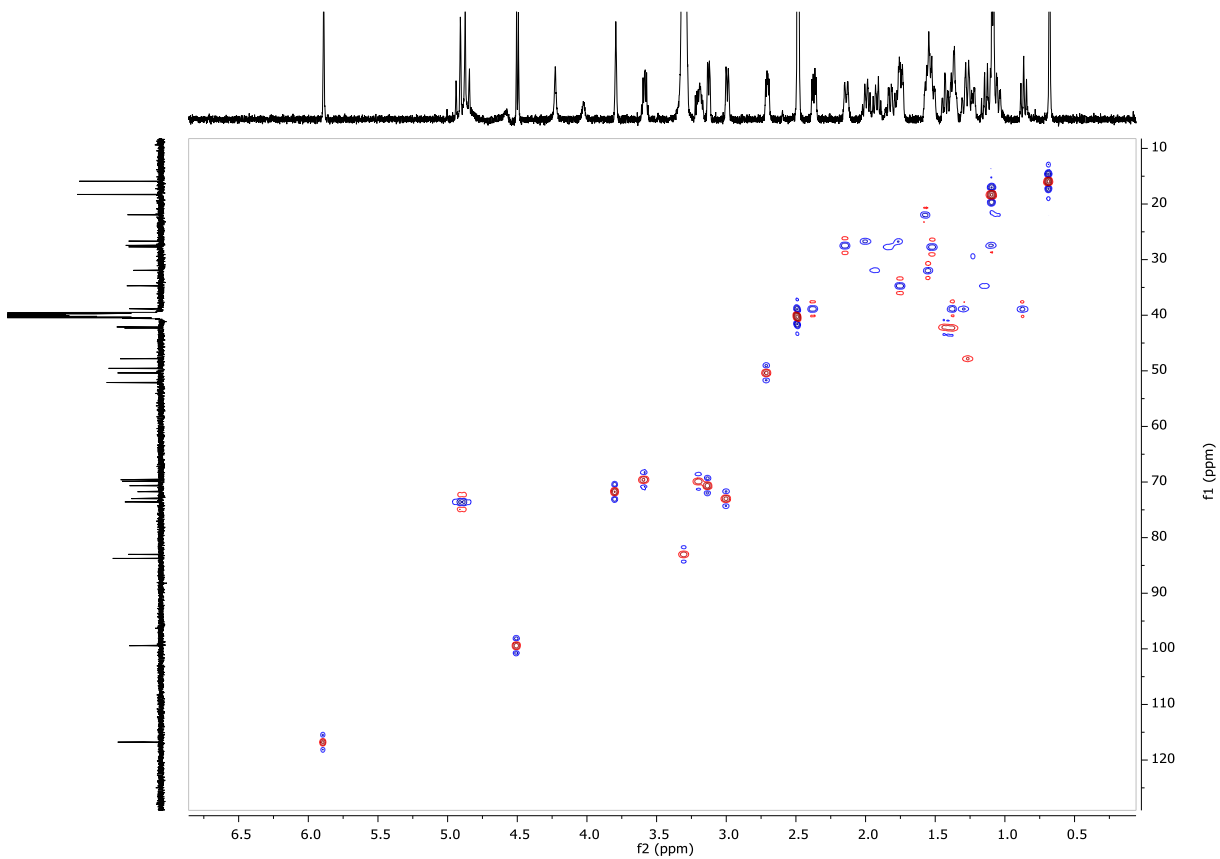

**Figure S38.** HSQC (500 MHz) spectrum of frugosidal (**5**) in DMSO- $d_6$

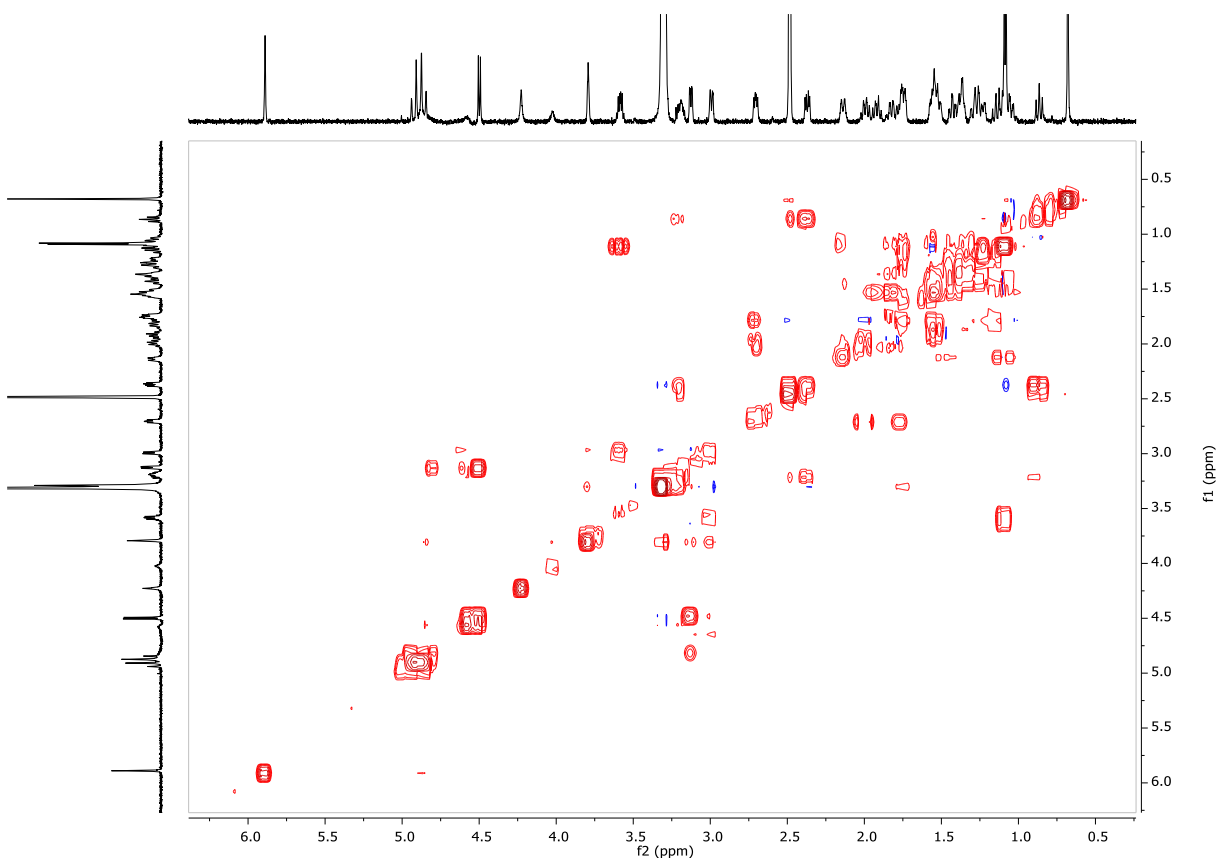

**Figure S39.**  $^1\text{H}$ - $^1\text{H}$  COSY (500 MHz) spectrum of frugosidal (**5**) in DMSO- $d_6$

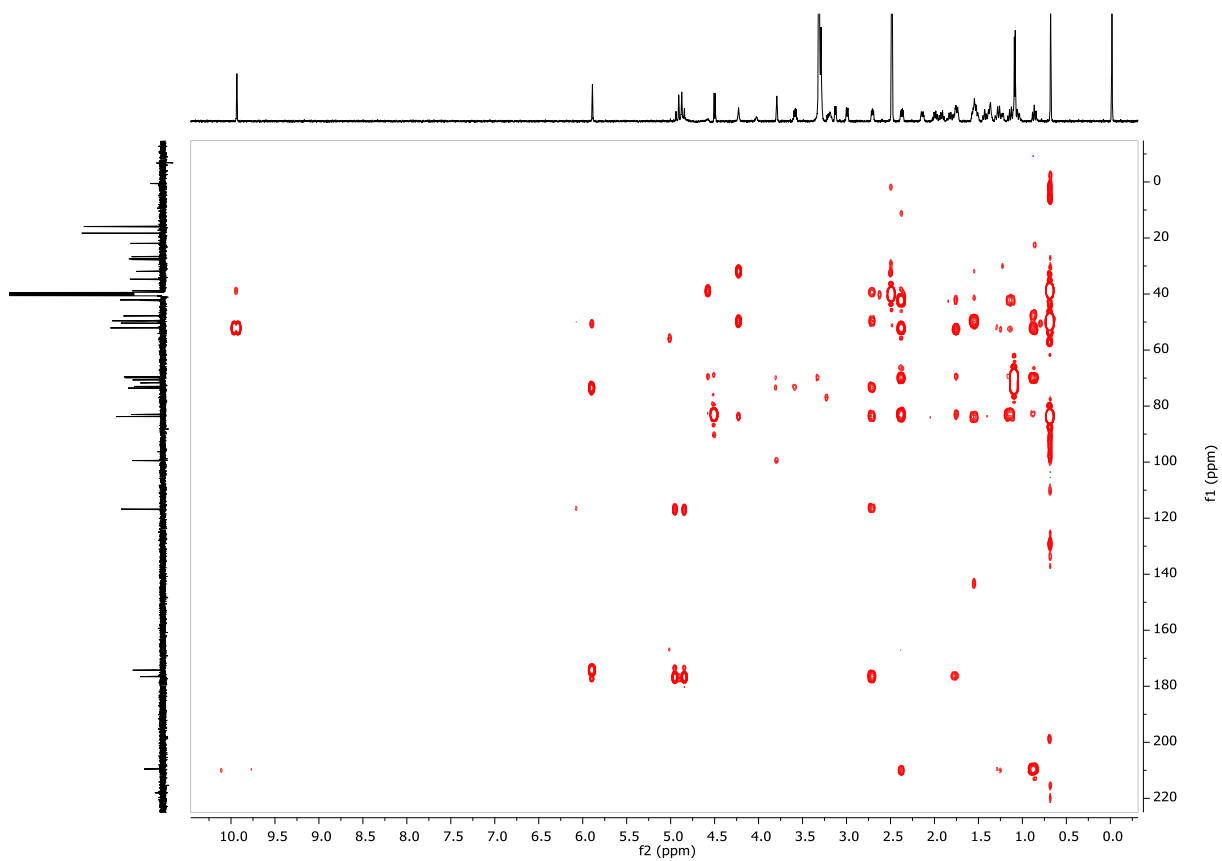

**Figure S40.** HMBC (500 MHz) spectrum of frugosidal (**5**) in DMSO- $d_6$

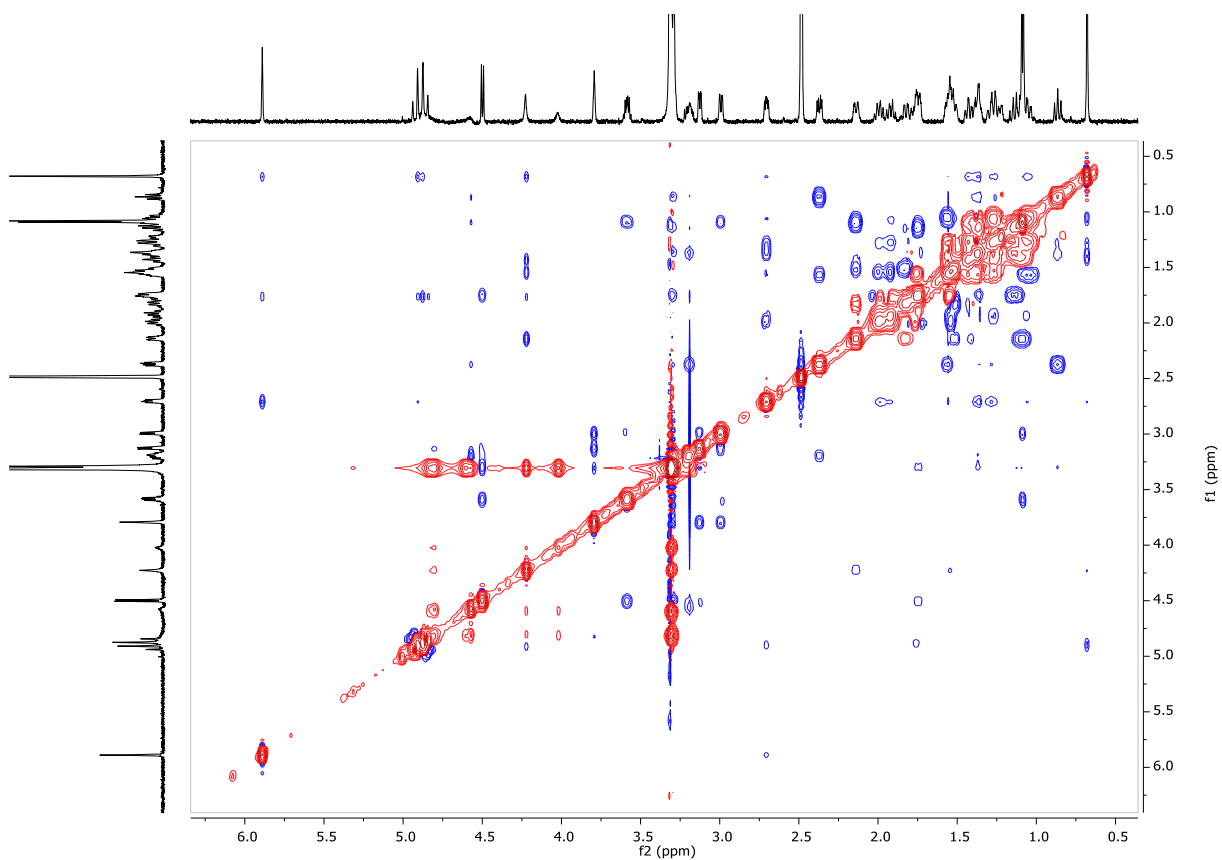

**Figure S41.** ROESY (500 MHz) spectrum of frugosidal (**5**) in DMSO- $d_6$

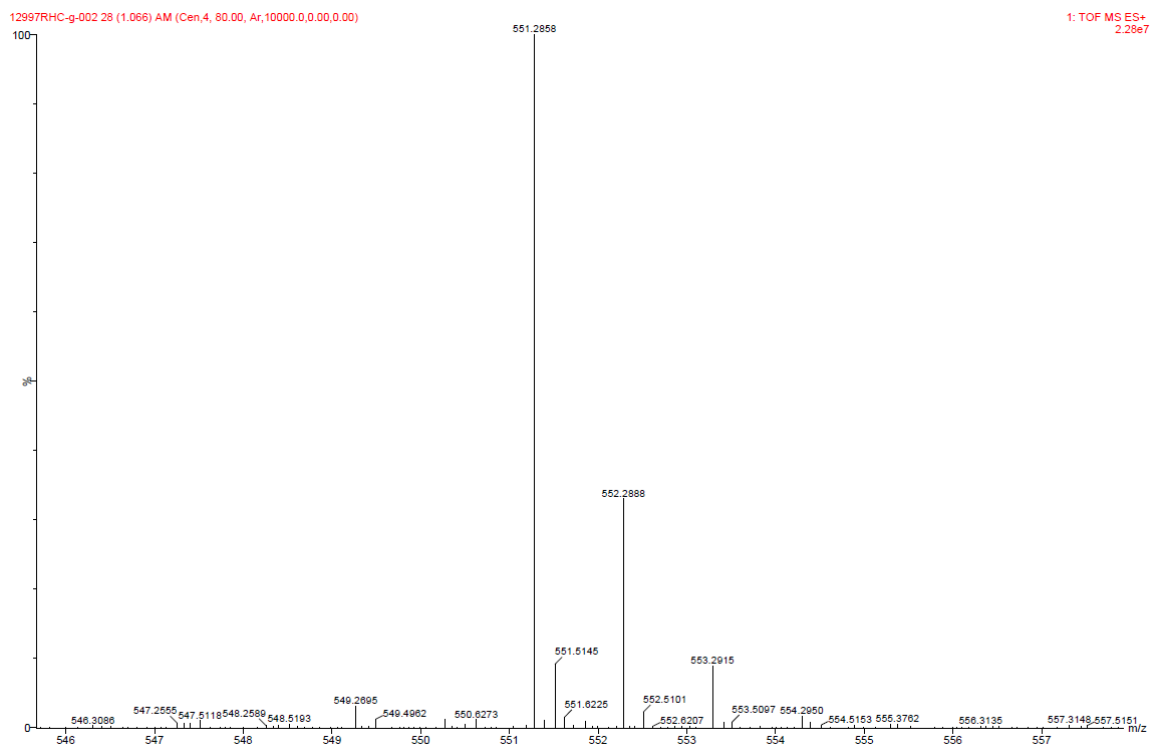

**Figure S42.** HRESIMS spectrum of frugosidal (**5**)

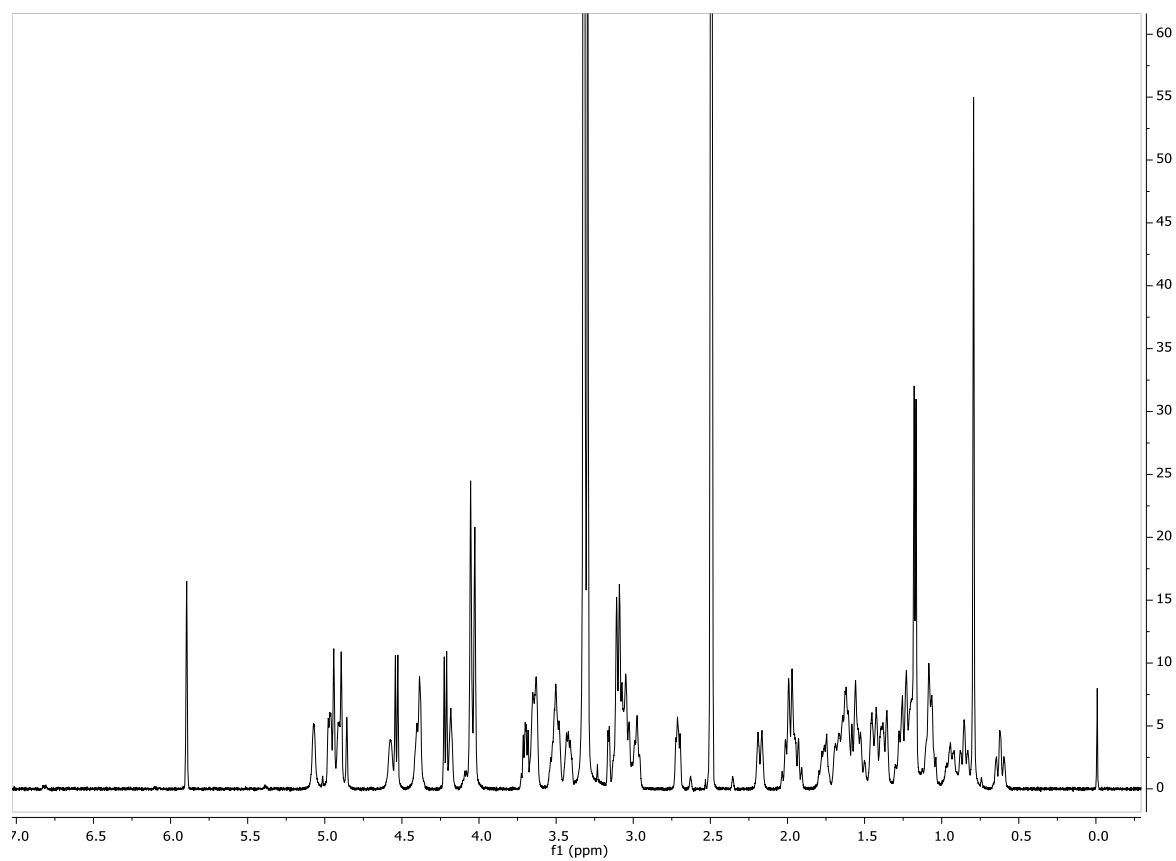

**Figure S43.**  $^1\text{H}$  NMR (600 MHz) spectrum of glucofrugoside (**6**) in  $\text{DMSO-}d_6$



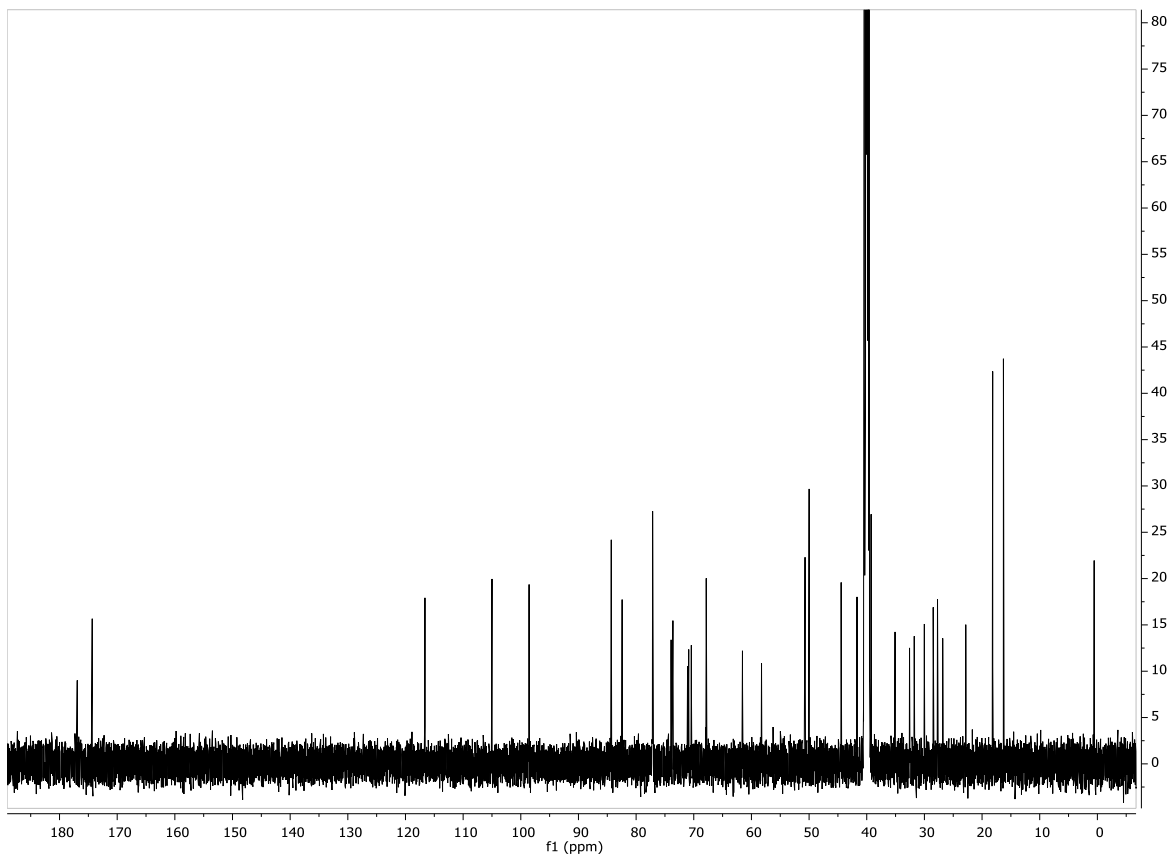

**Figure S44.**  $^{13}\text{C}$  NMR (150 MHz) spectrum of glucofrugoside (**6**) in  $\text{DMSO-}d_6$

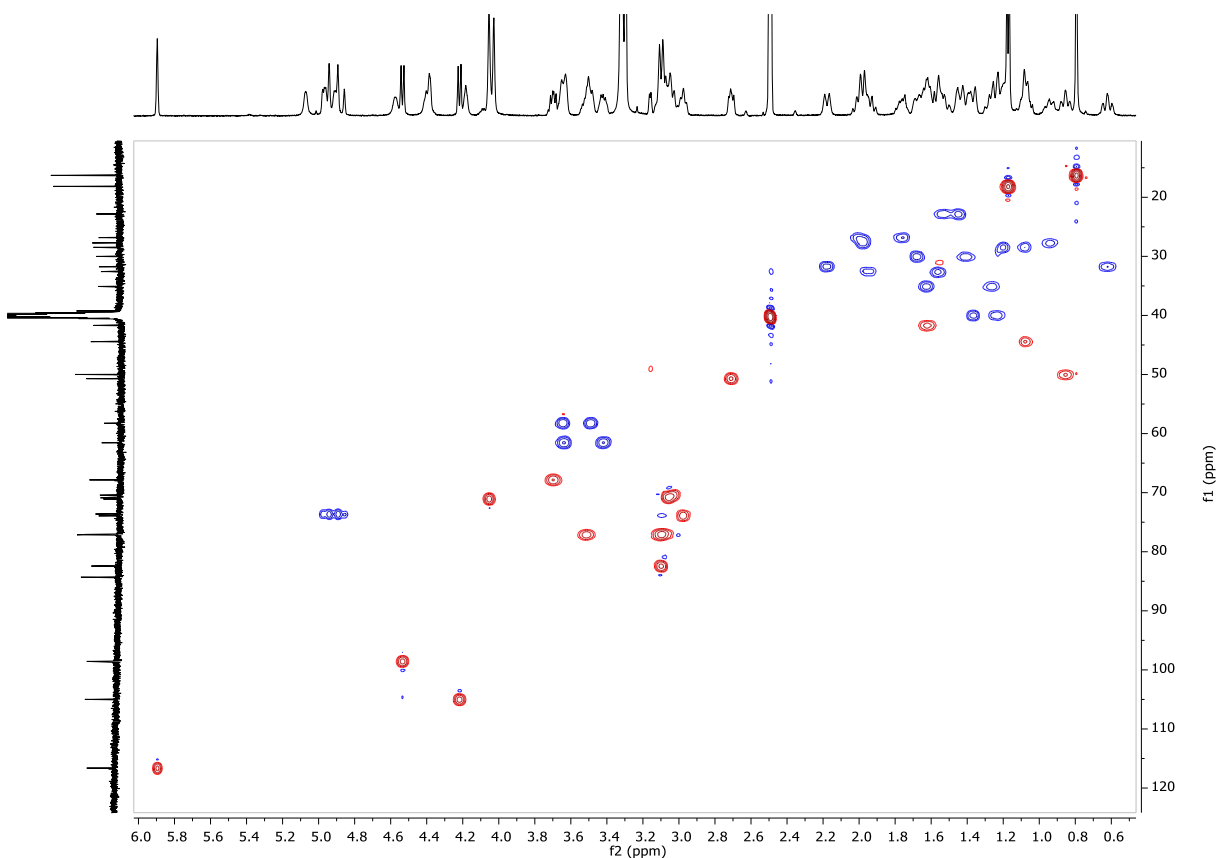

**Figure S45.** HSQC (500 MHz) spectrum of glucofrugoside (**6**) in  $\text{DMSO-}d_6$

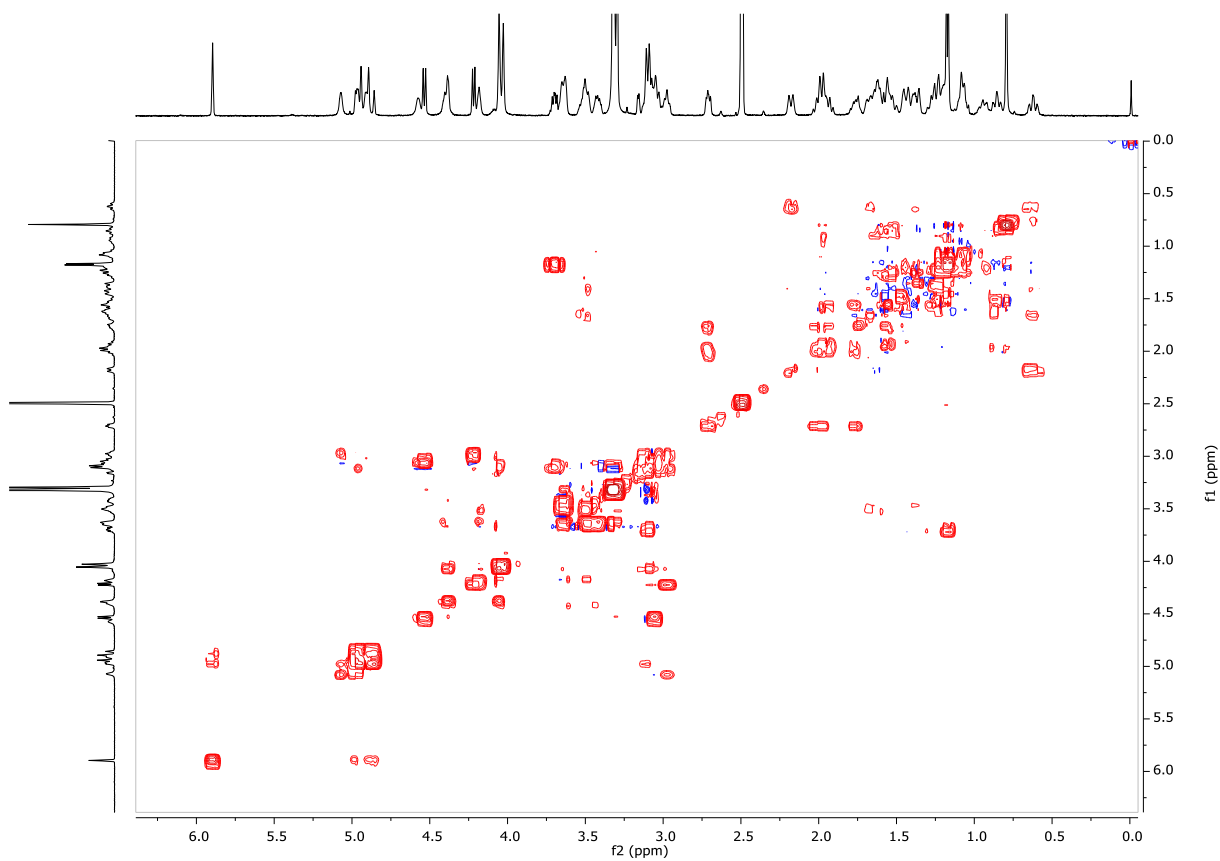

**Figure S46.**  $^1\text{H}$ - $^1\text{H}$  COSY (500 MHz) spectrum of glucofrugoside (**6**) in  $\text{DMSO-}d_6$

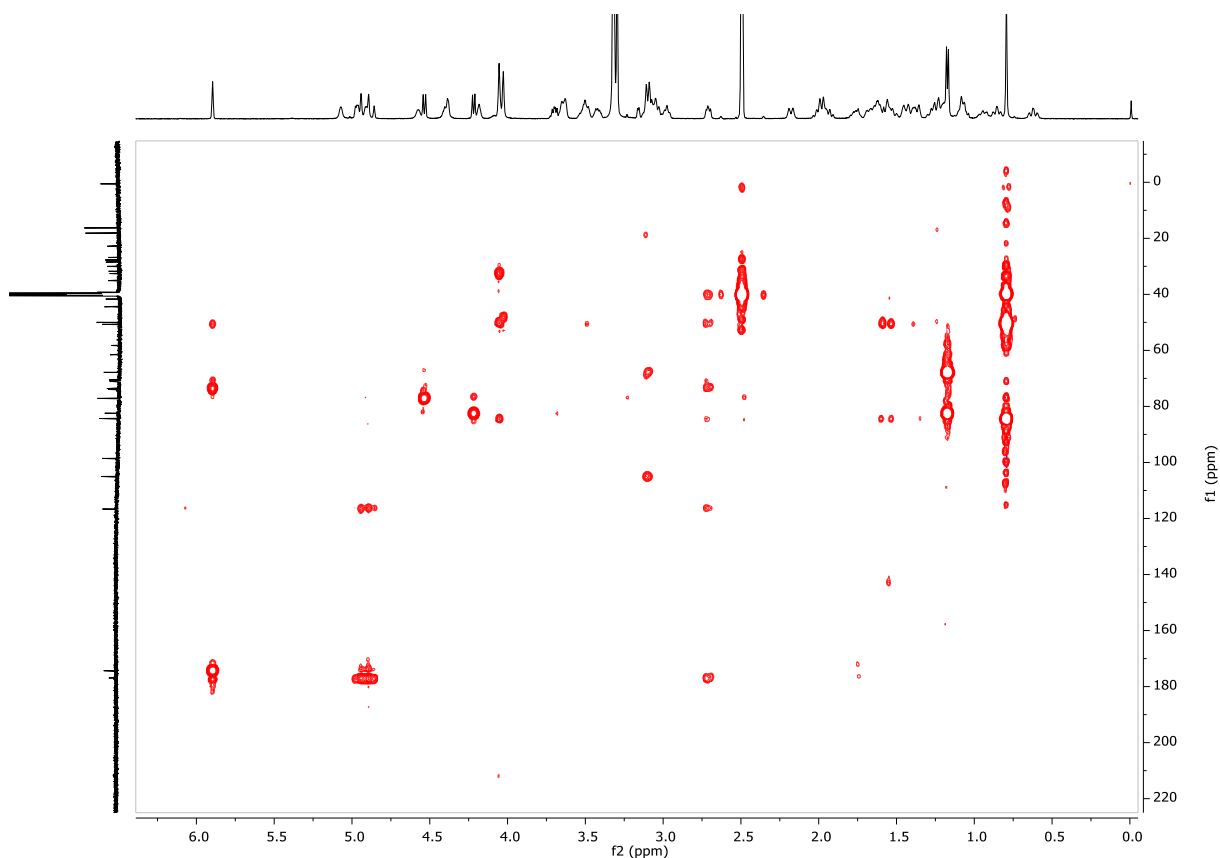

**Figure S47.** HMBC (500 MHz) spectrum of glucofrugoside (**6**) in  $\text{DMSO-}d_6$

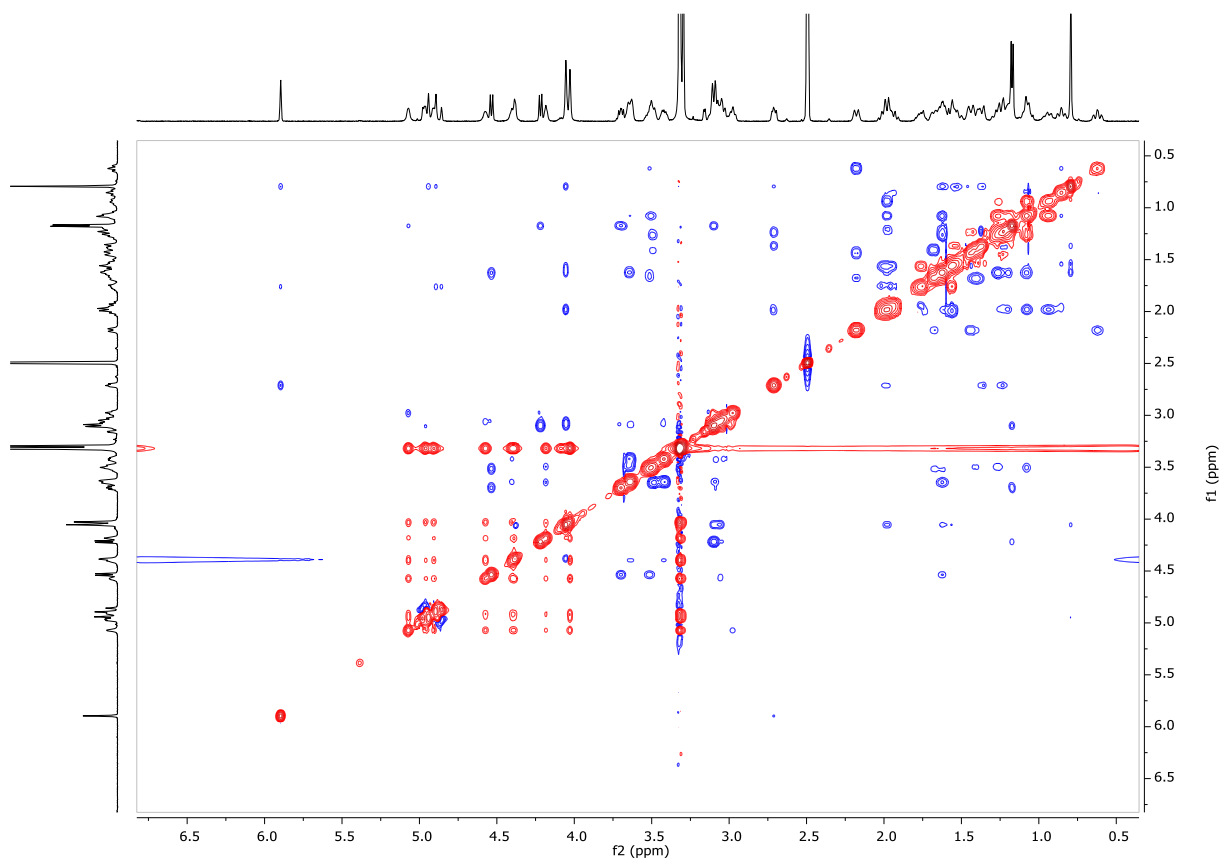

**Figure S48.** ROESY (500 MHz) spectrum of glucofrugoside (**6**) in DMSO- $d_6$

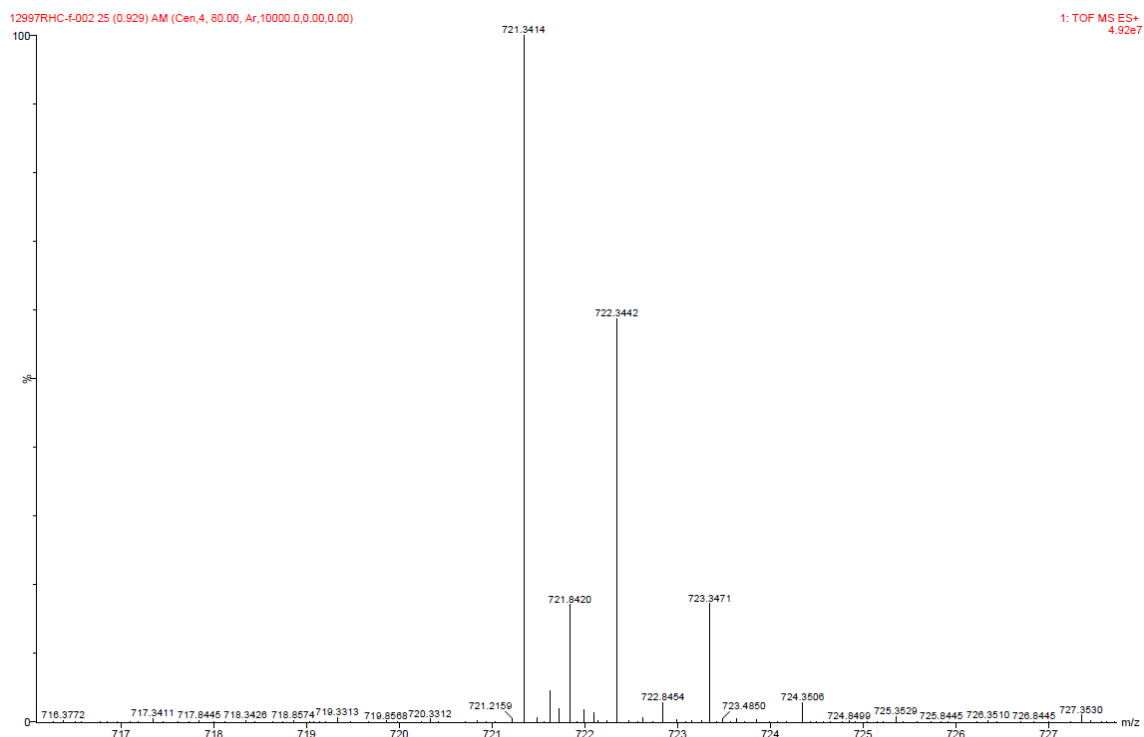

**Figure S49.** HRESIMS spectrum of glucofrugoside (**6**)

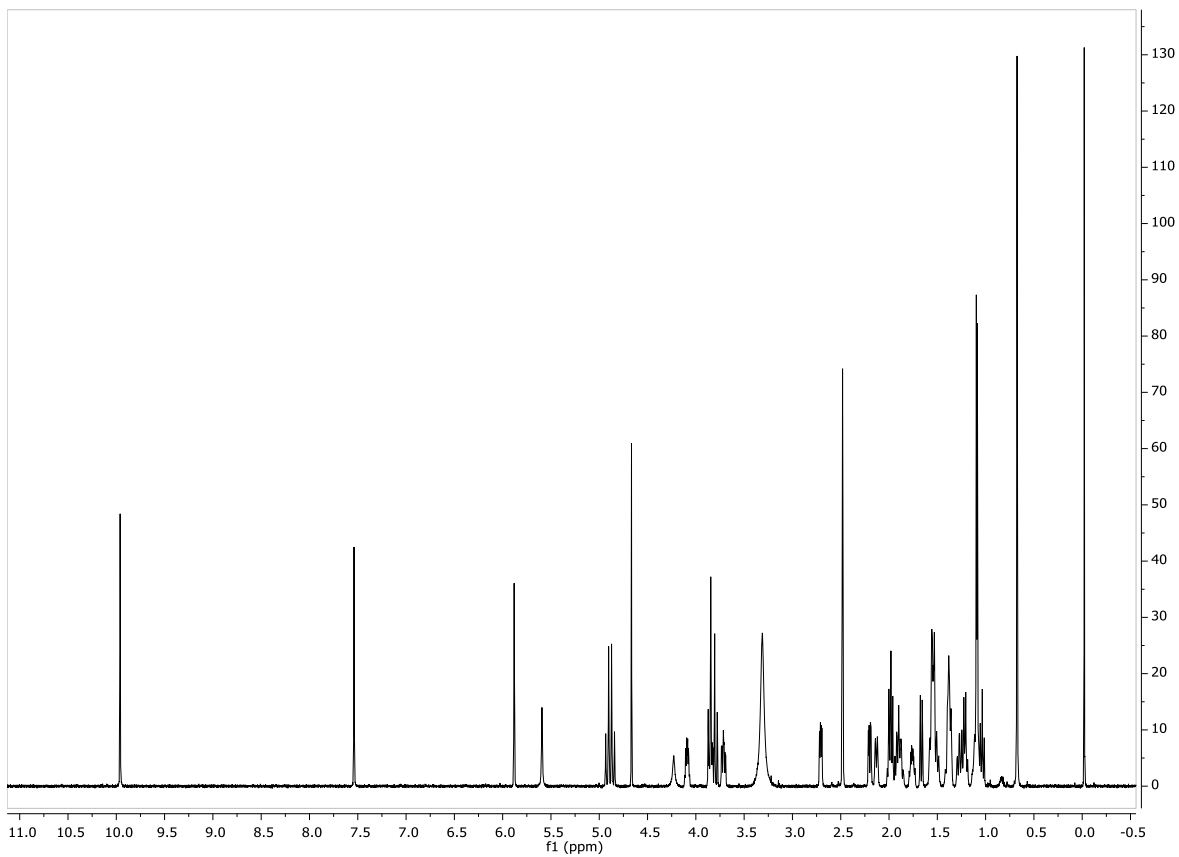

**Figure S50.**  $^1\text{H}$  NMR (600 MHz) spectrum of uscharin (**7**) in  $\text{DMSO-}d_6$

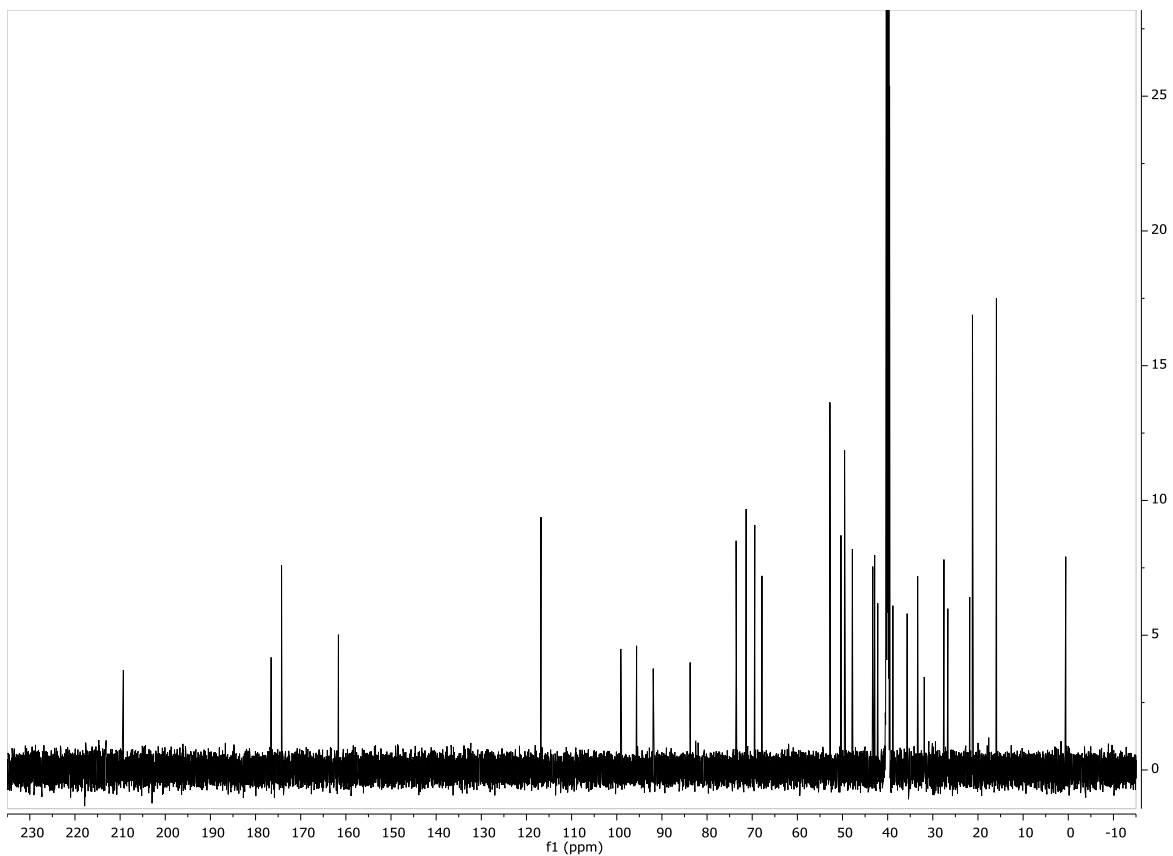

**Figure S51.**  $^{13}\text{C}$  NMR (150 MHz) spectrum of uscharin (**7**) in  $\text{DMSO-}d_6$

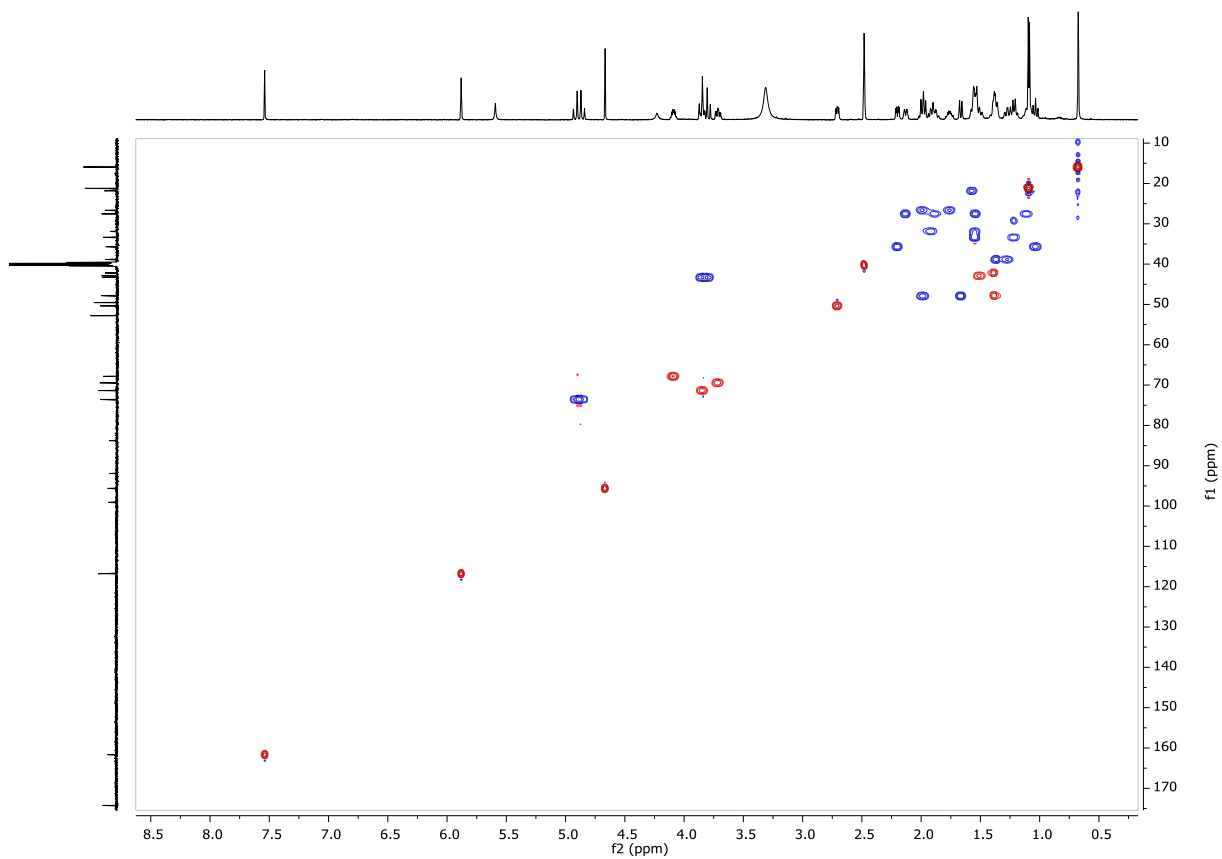

**Figure S52.** HSQC (500 MHz) spectrum of uscharin (**7**) in DMSO-*d*<sub>6</sub>

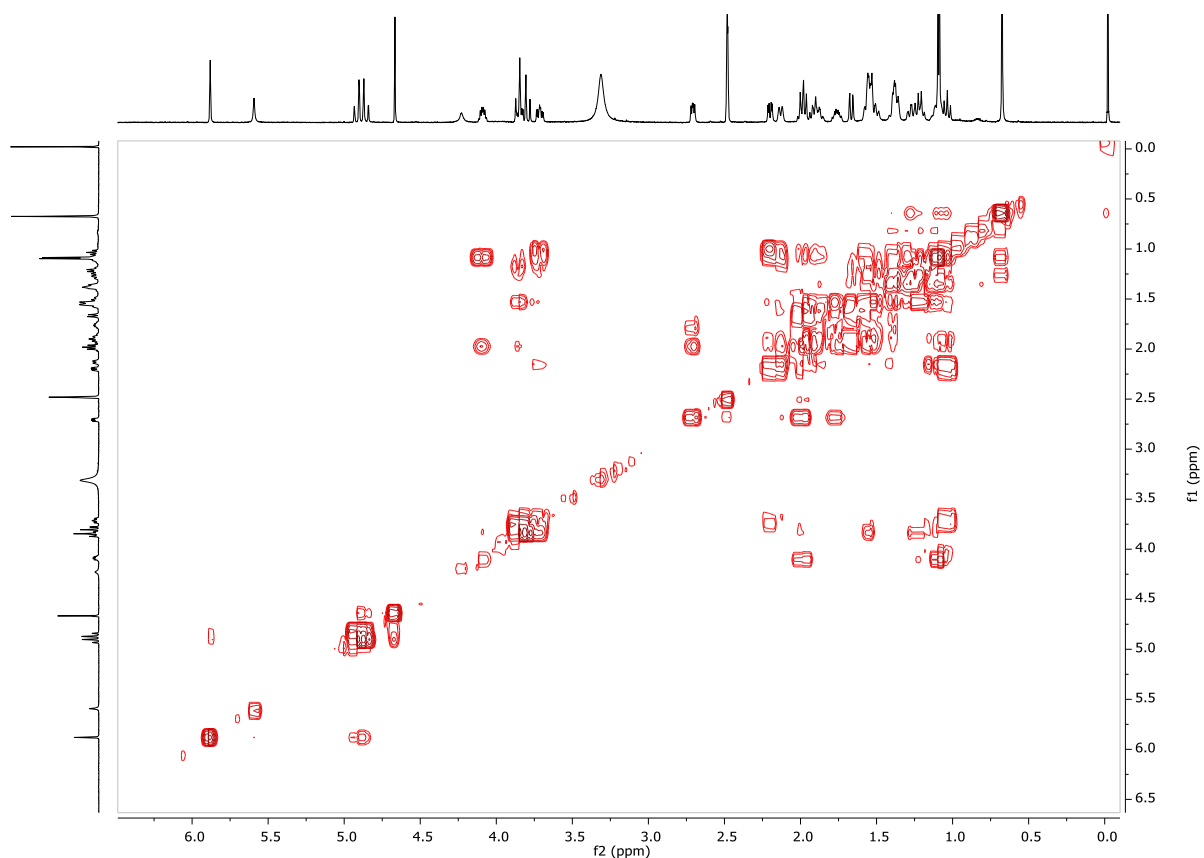

**Figure S53.** <sup>1</sup>H-<sup>1</sup>H COSY (500 MHz) spectrum of uscharin (**7**) in DMSO-*d*<sub>6</sub>

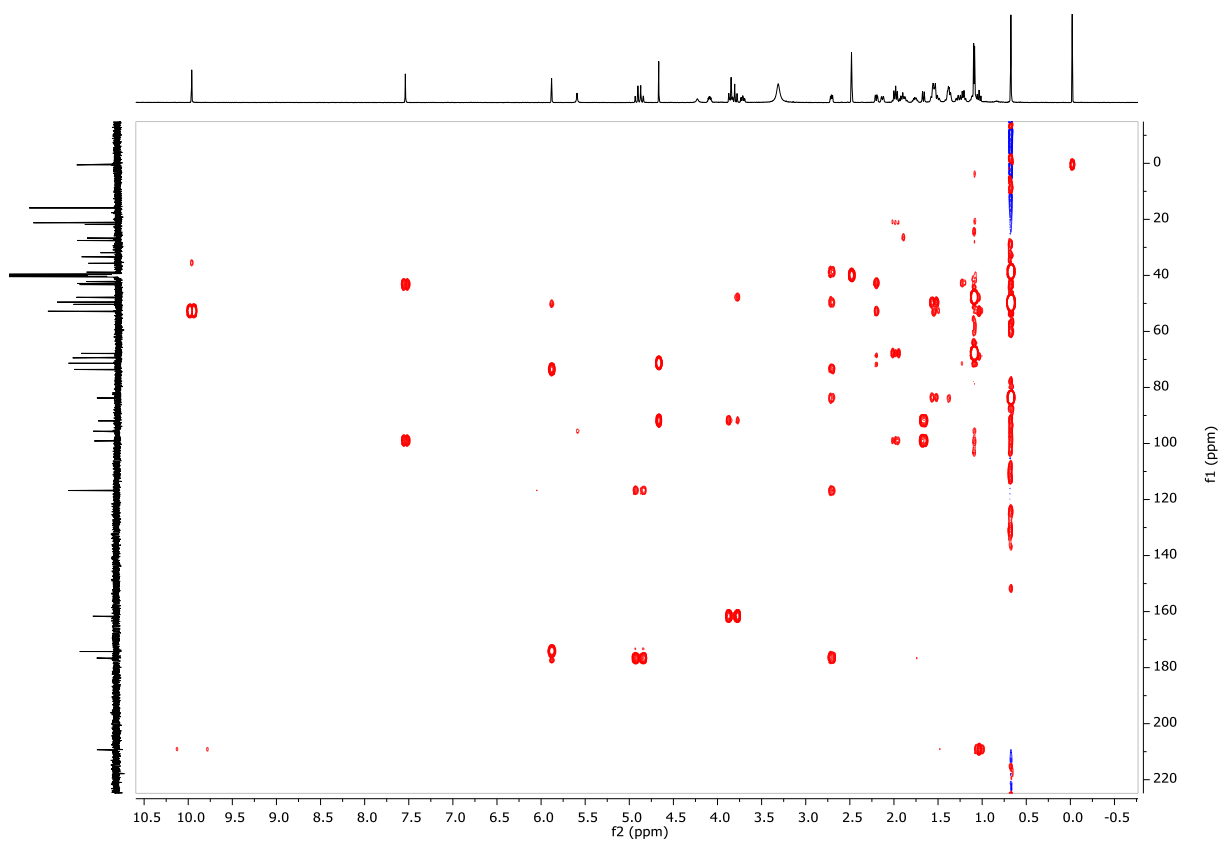

**Figure S54.** HMBC (500 MHz) spectrum of uscharin (**7**) in DMSO-*d*<sub>6</sub>

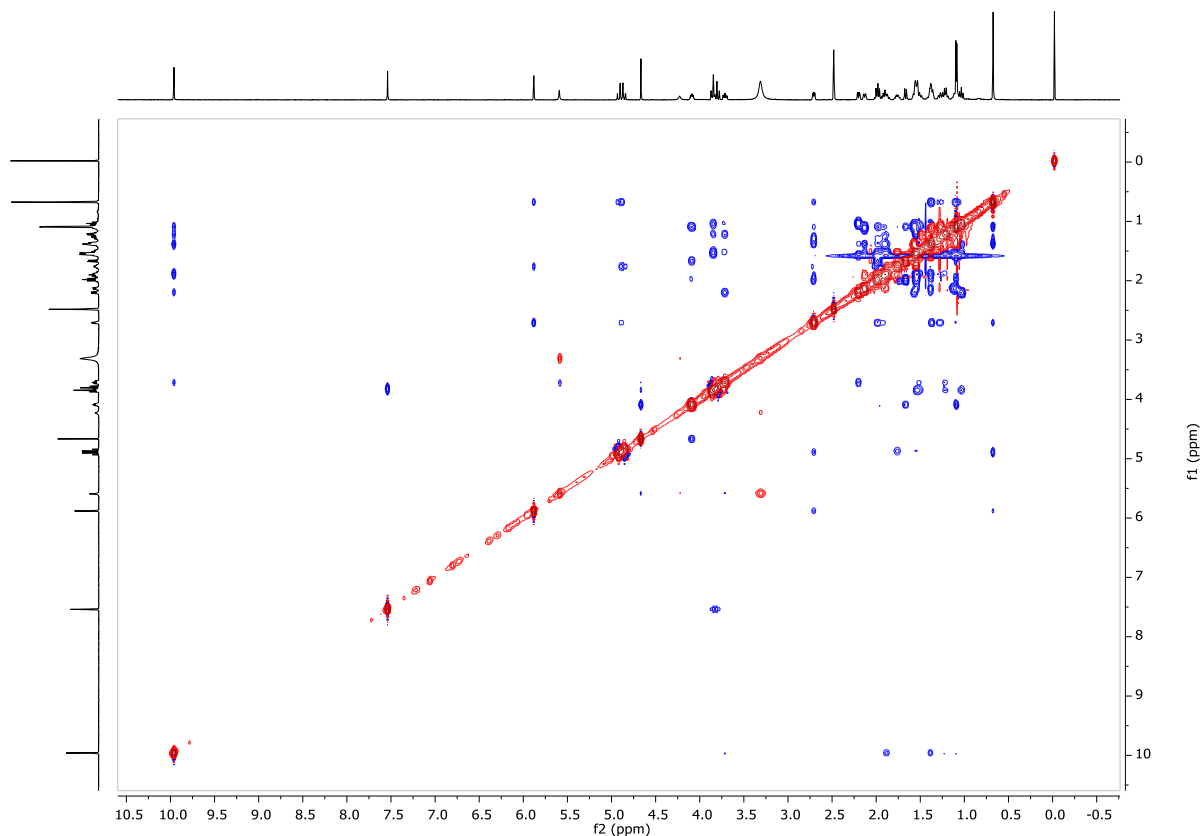

**Figure S55.** ROESY (500 MHz) spectrum of uscharin (**7**) in DMSO-*d*<sub>6</sub>

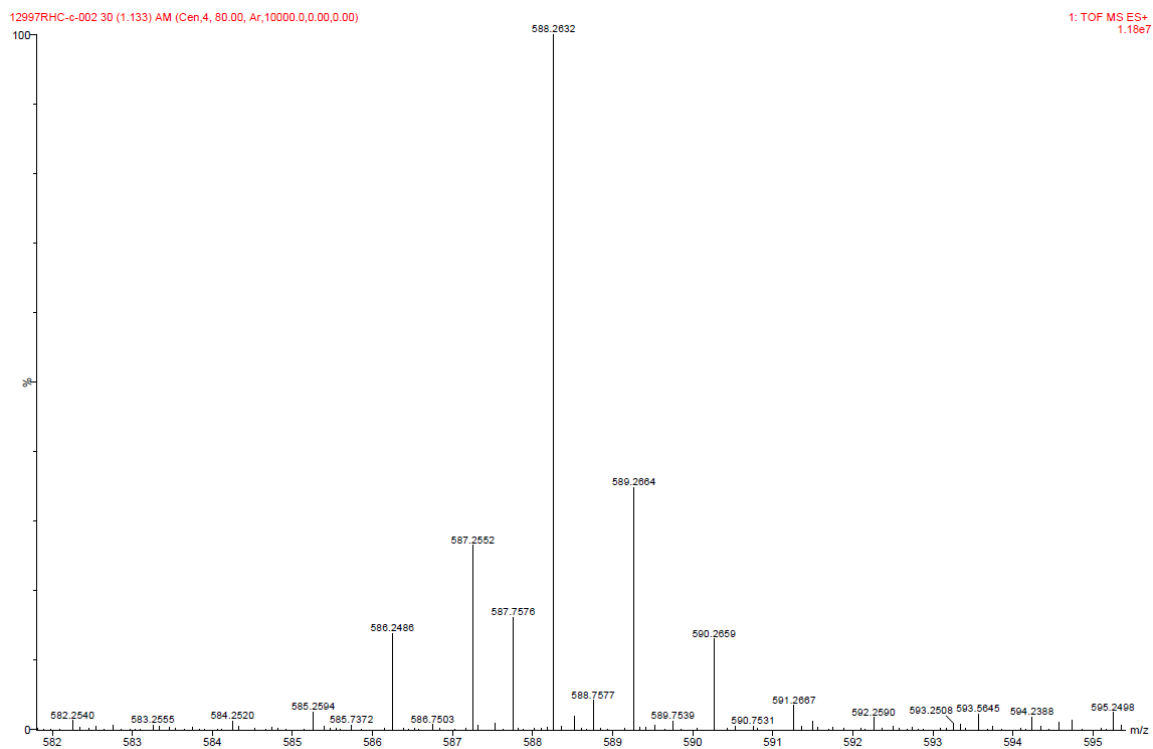

**Figure S56.** HRESIMS spectrum of uscharin (**7**)

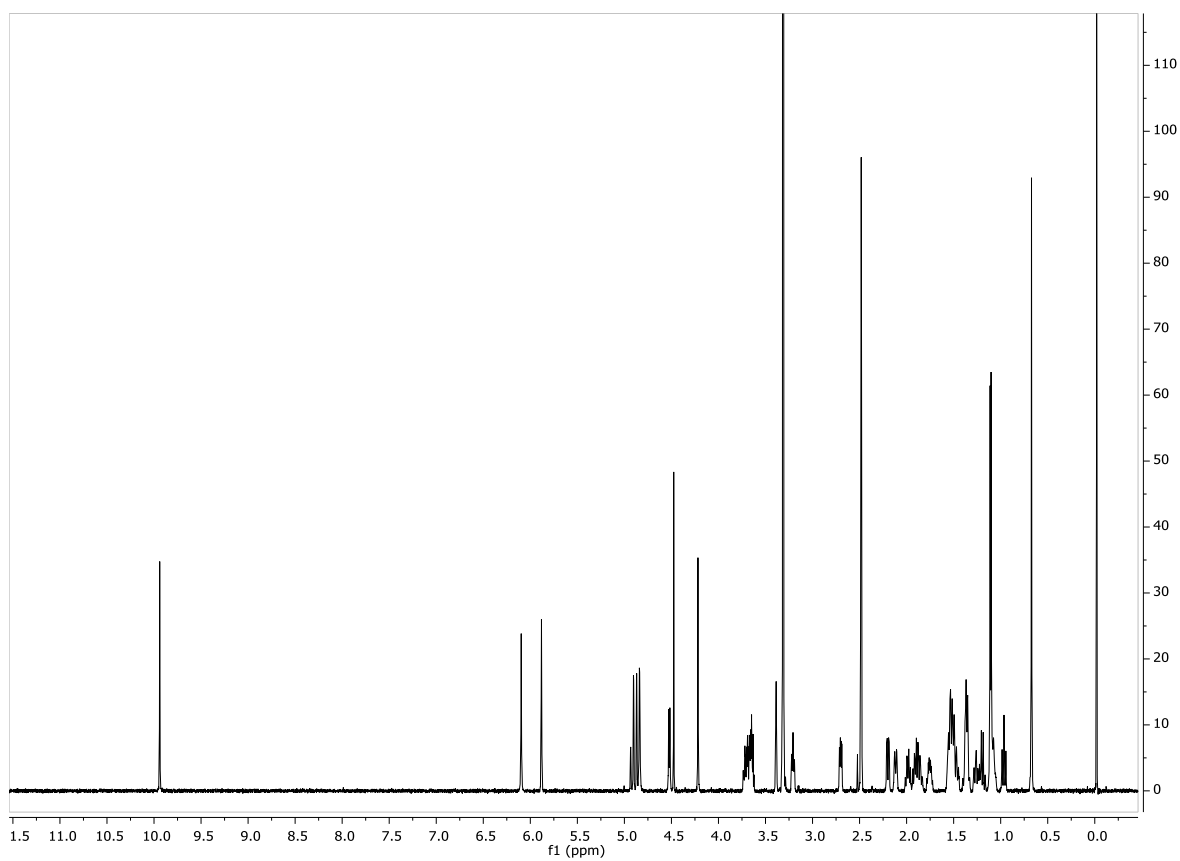

**Figure S57.**  $^1\text{H}$  NMR (600 MHz) spectrum of calotoxin (**8**) in  $\text{DMSO-}d_6$

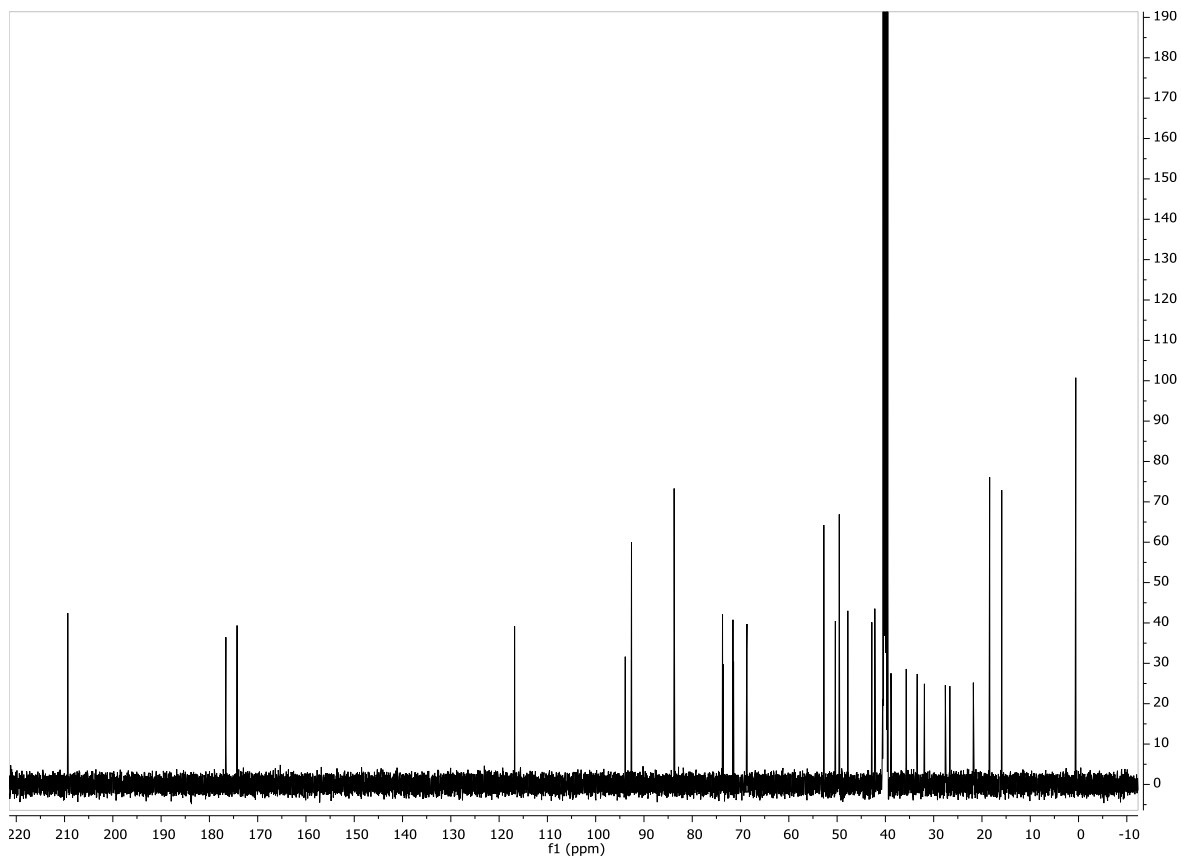

**Figure S58.**  $^{13}\text{C}$  NMR (150 MHz) spectrum of calotoxin (**8**) in  $\text{DMSO-}d_6$

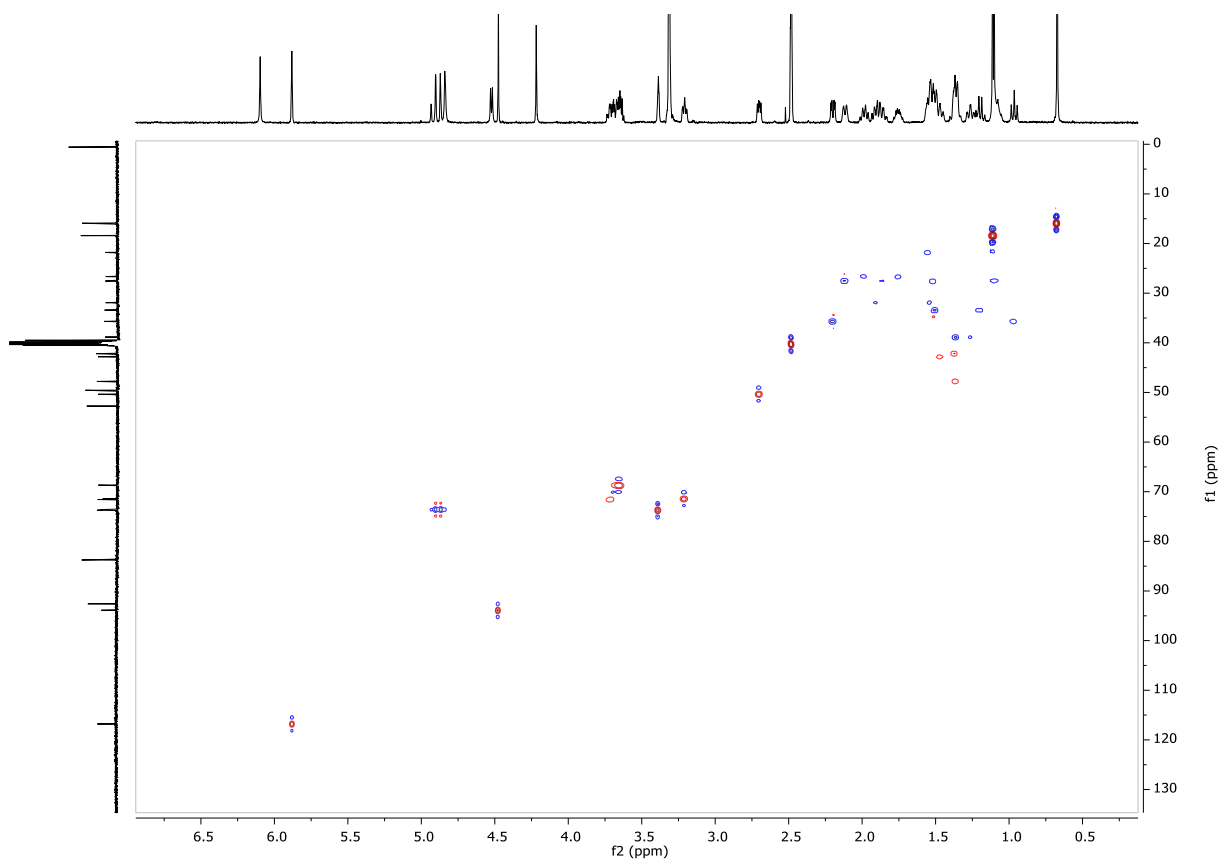

**Figure S59.** HSQC (500 MHz) spectrum of calotoxin (**8**) in  $\text{DMSO-}d_6$



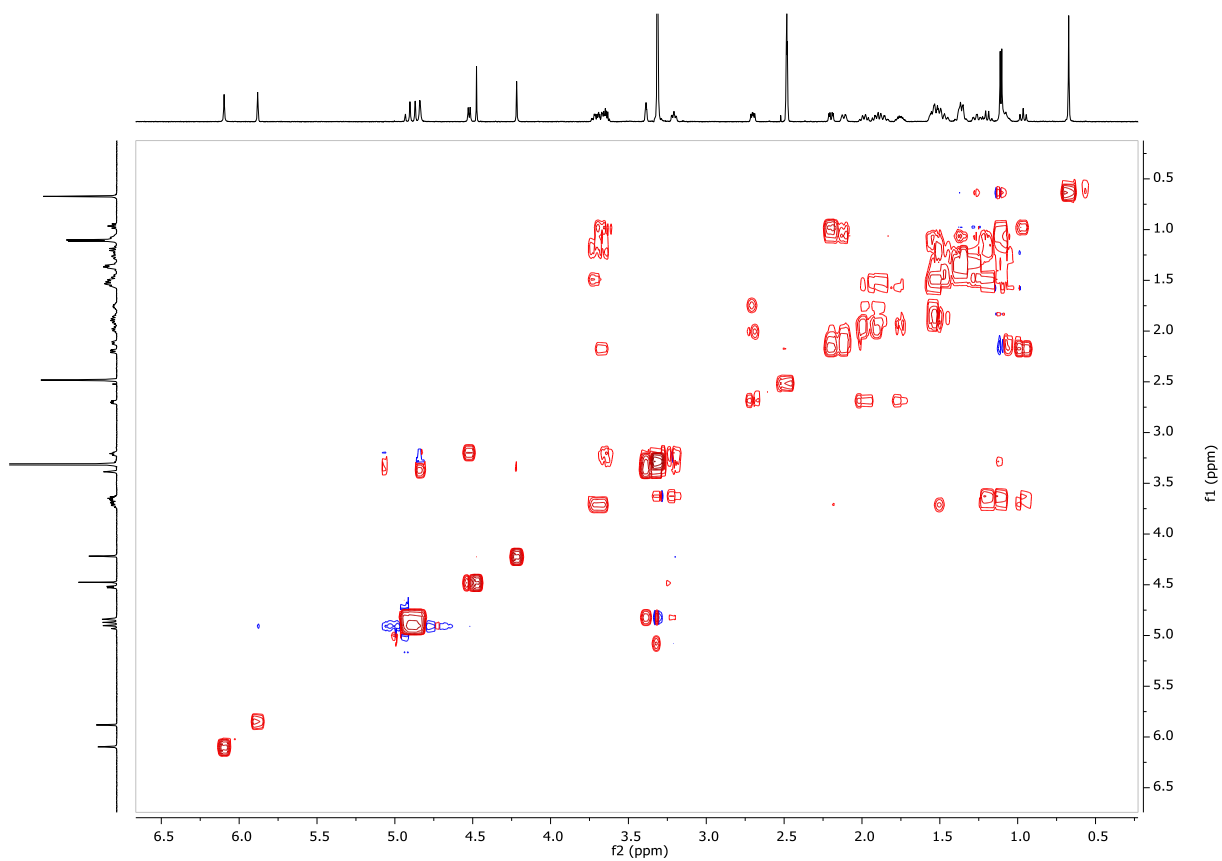

**Figure S60.**  $^1\text{H}$ - $^1\text{H}$  COSY (500 MHz) spectrum of calotoxin (**8**) in  $\text{DMSO-}d_6$

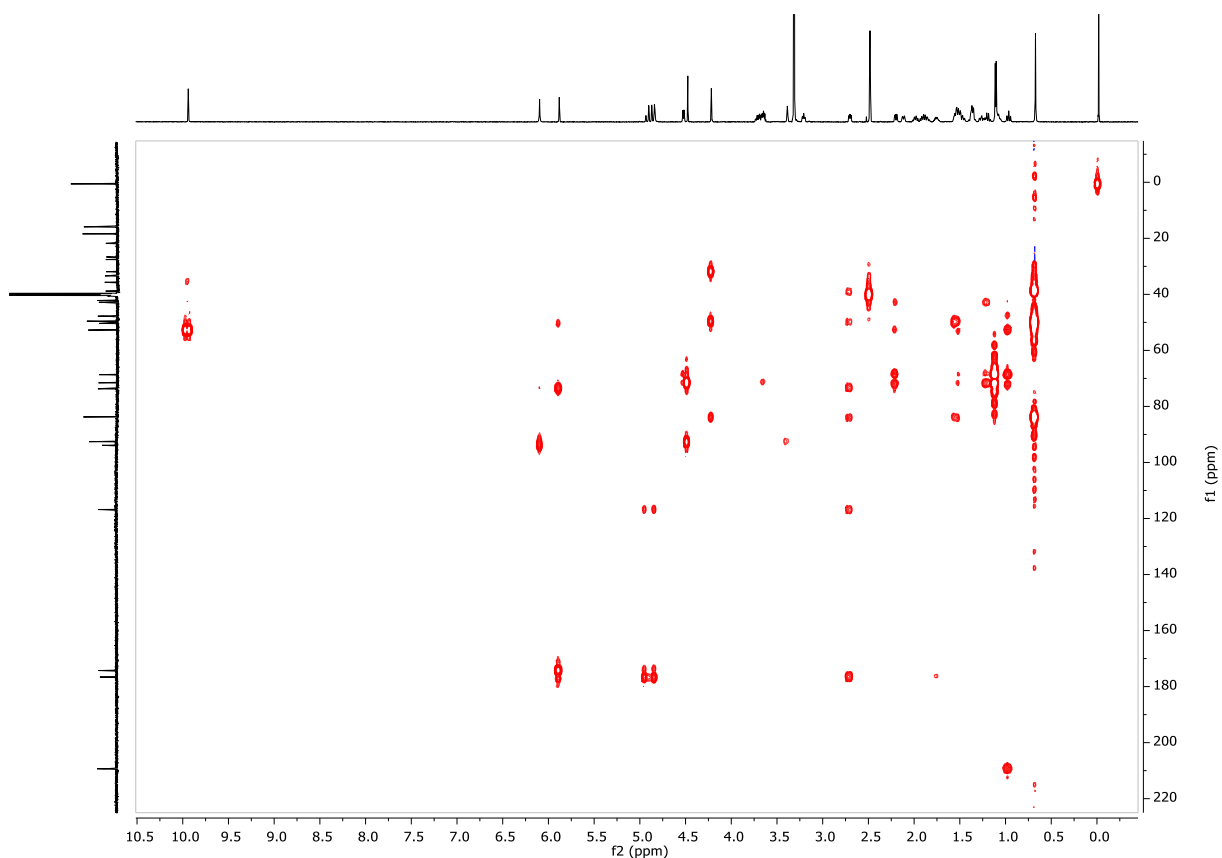

**Figure S61.** HMBC (500 MHz) spectrum of calotoxin (**8**) in  $\text{DMSO-}d_6$

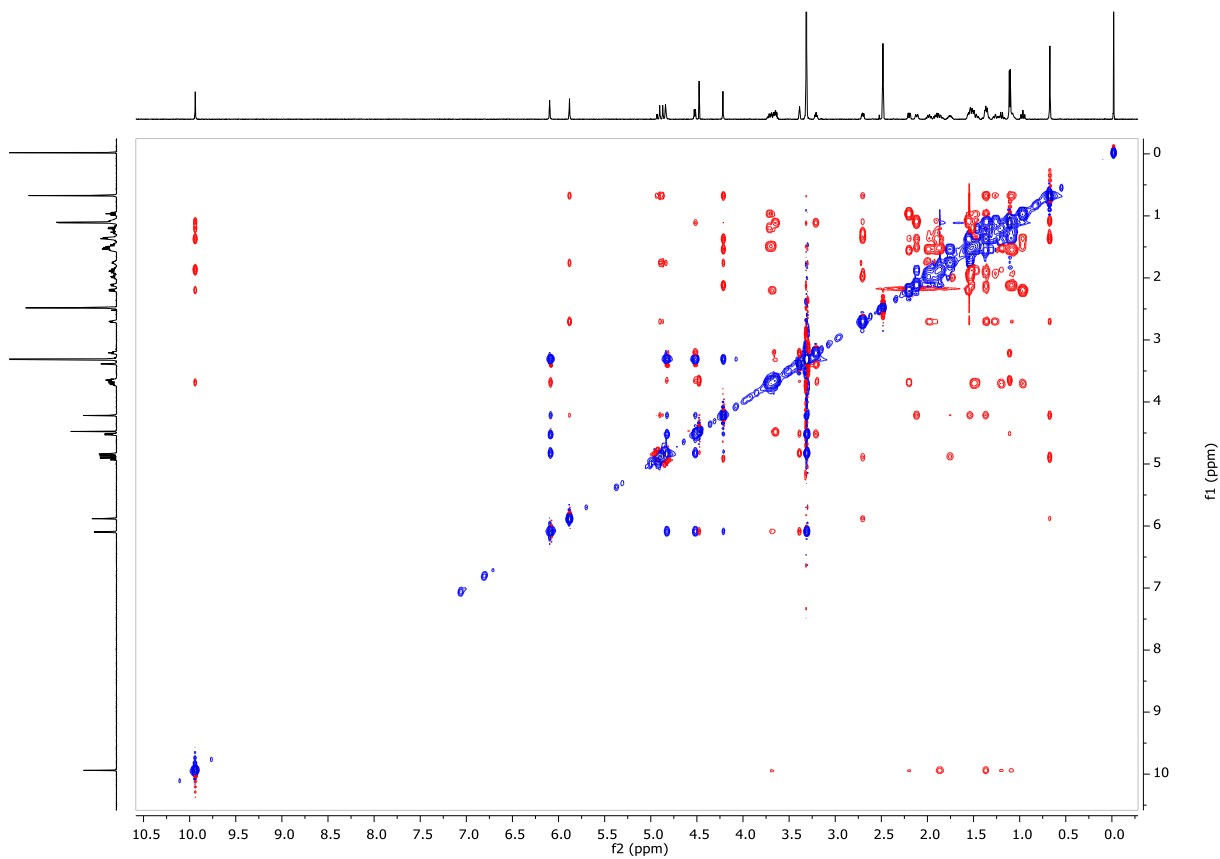

**Figure S62.** ROESY (500 MHz) spectrum of calotoxin (**8**) in DMSO- $d_6$

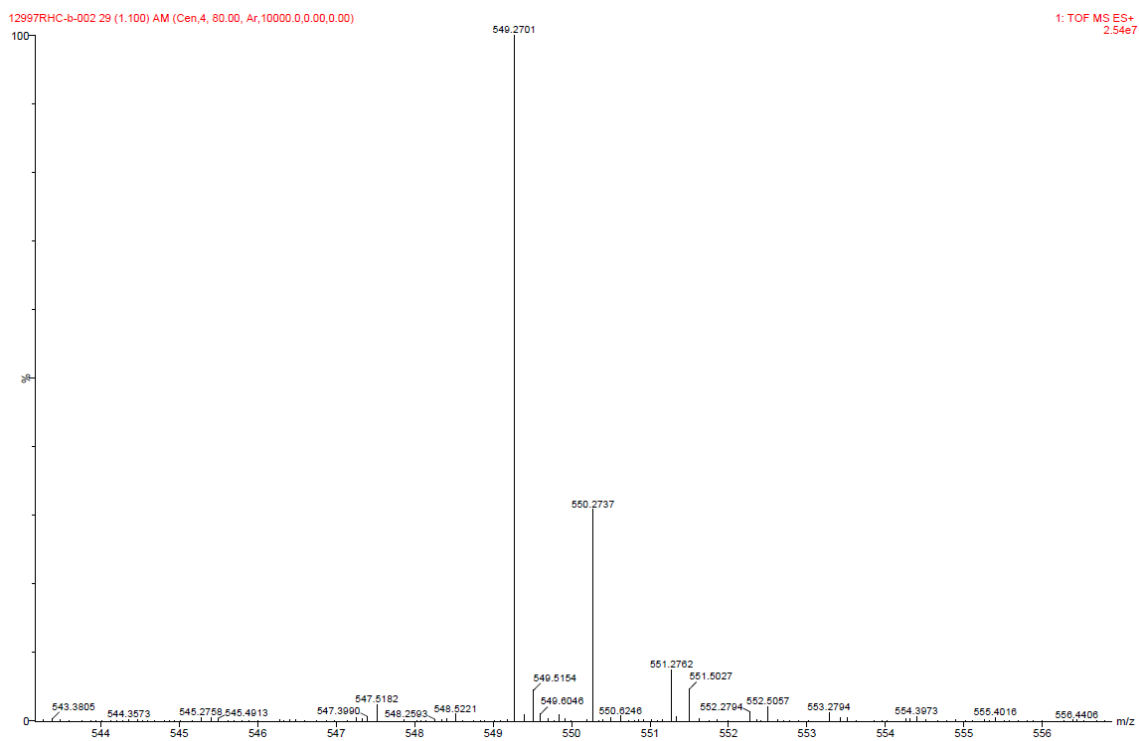

**Figure S63.** HRESIMS spectrum of calotoxin (**8**)

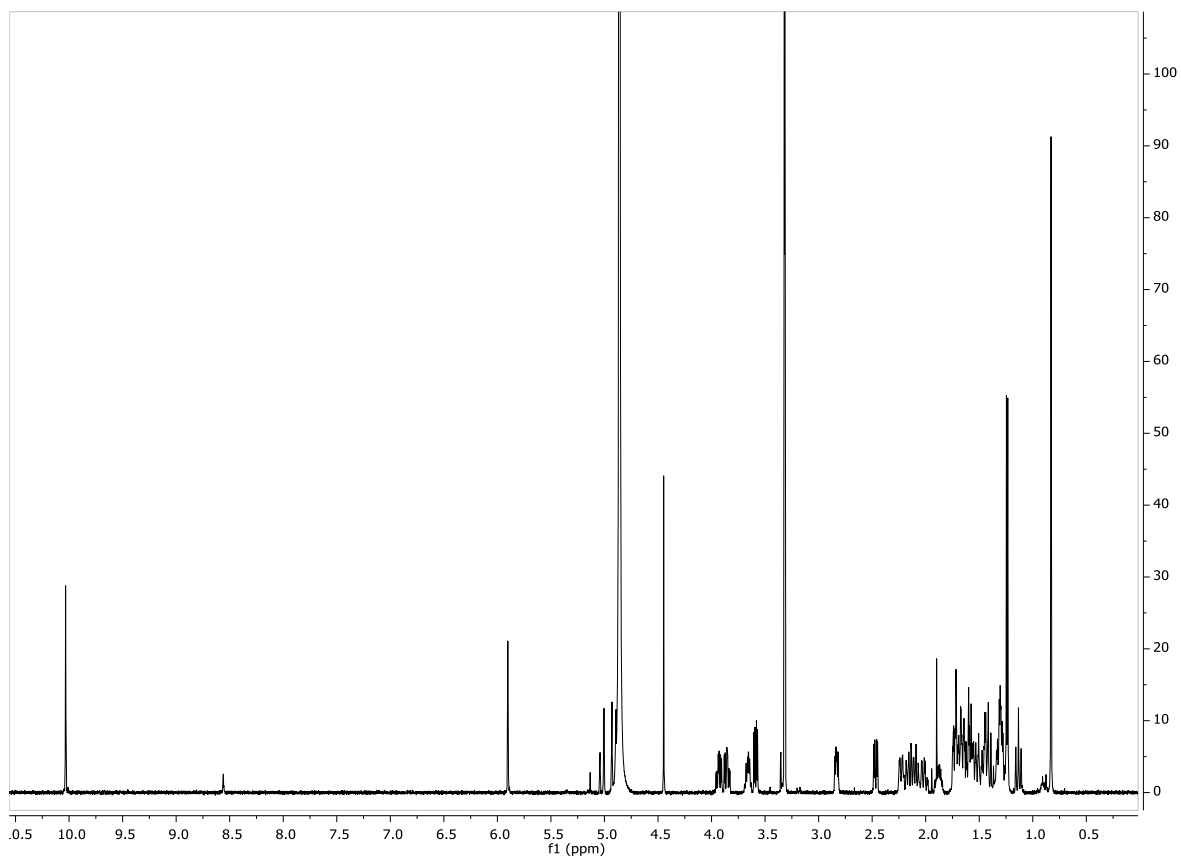

**Figure S64.** <sup>1</sup>H NMR (500 MHz) spectrum of calotropin (**9**) in methanol-*d*<sub>4</sub>

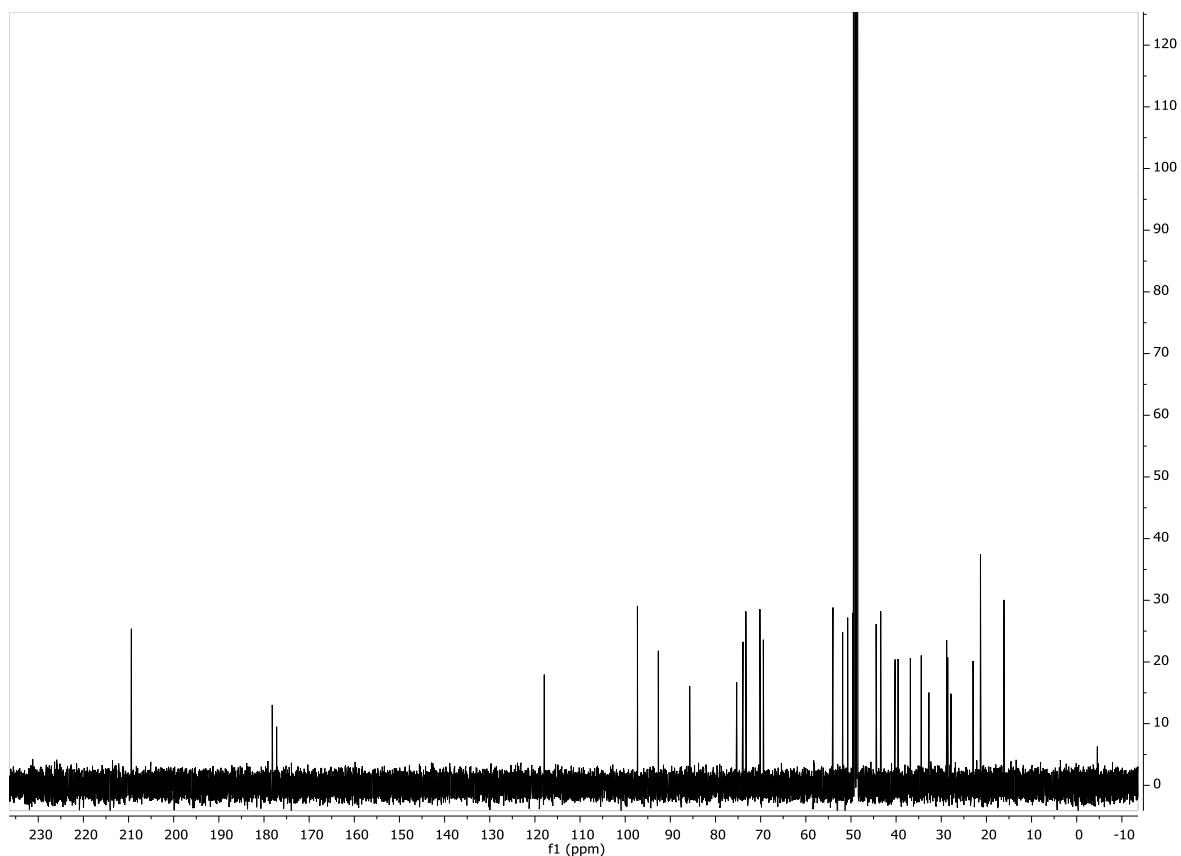

**Figure S65.** <sup>13</sup>C NMR (150 MHz) spectrum of calotropin (**9**) in methanol-*d*<sub>4</sub>

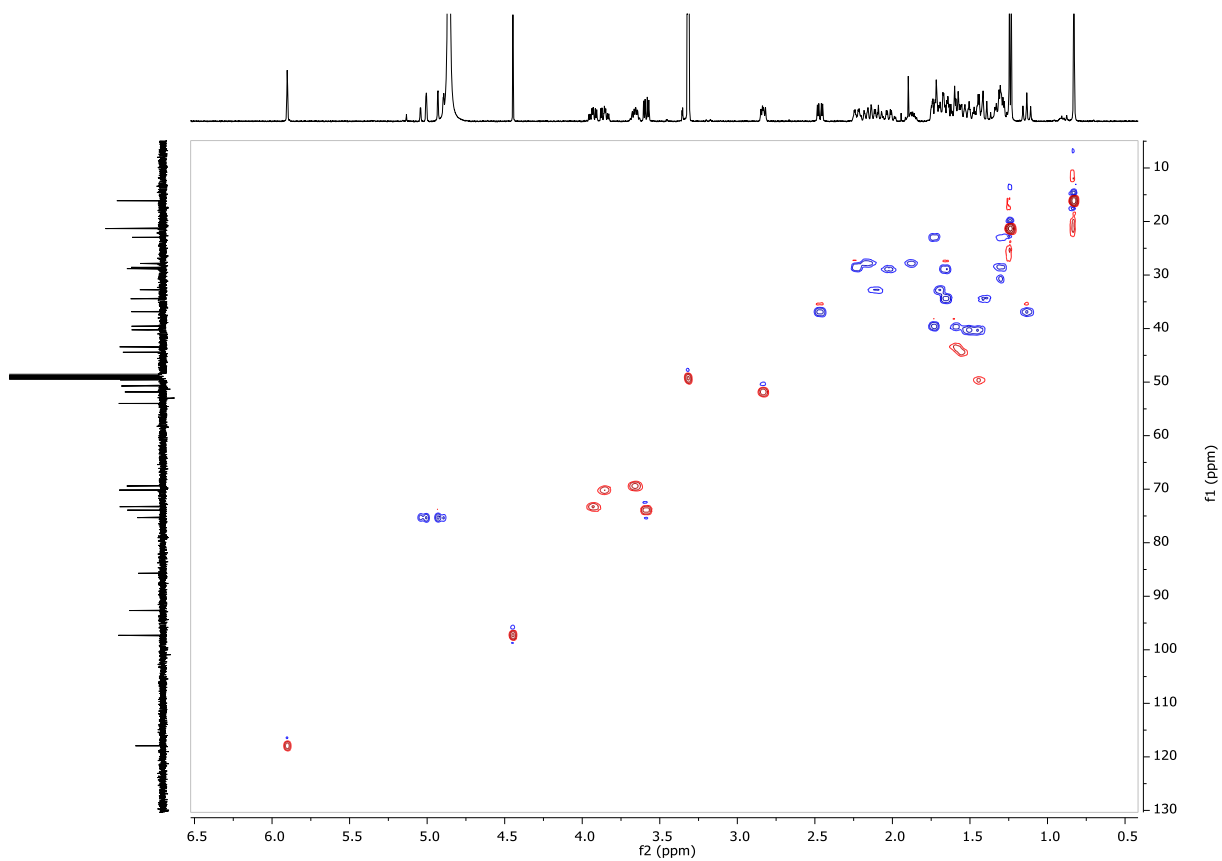

**Figure S66.** HSQC (500 MHz) spectrum of calotropin (**9**) in methanol- $d_4$

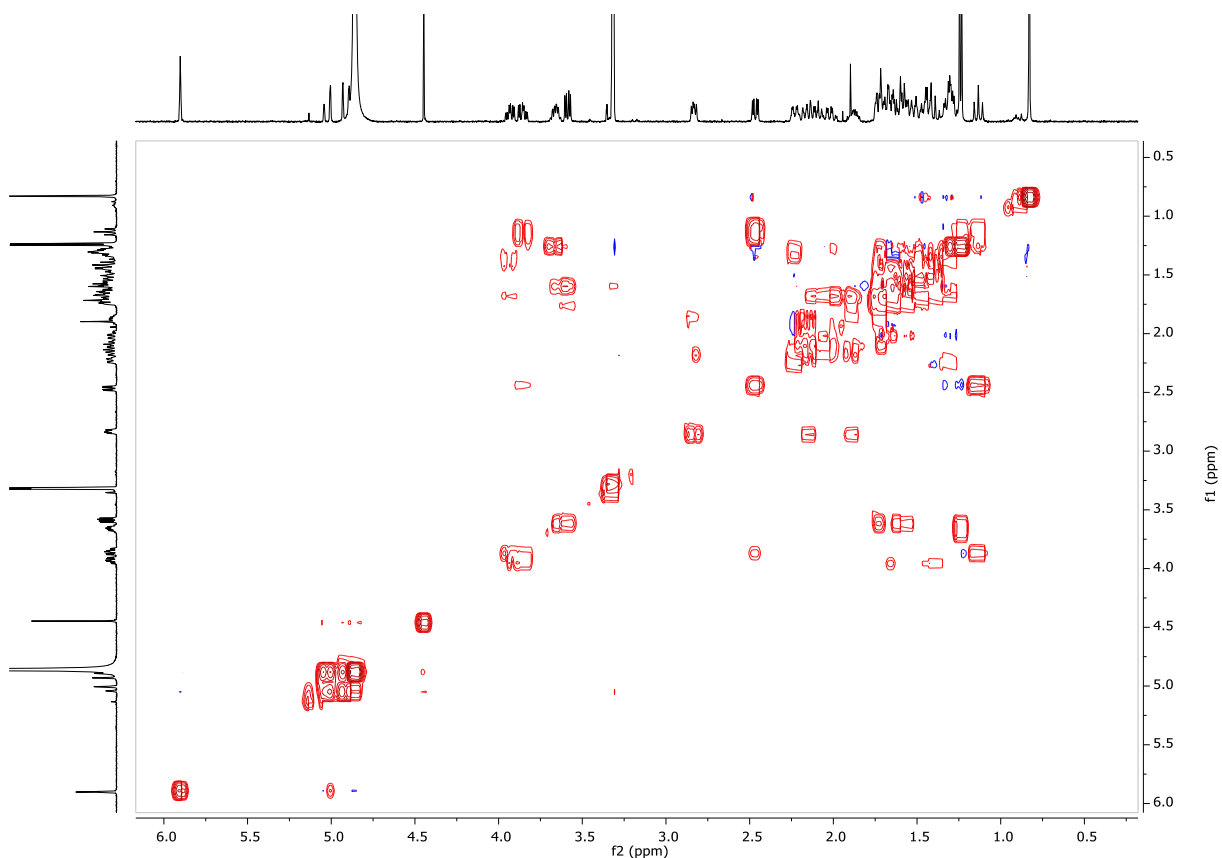

**Figure S67.**  $^1\text{H}$ - $^1\text{H}$  COSY (500 MHz) spectrum of calotropin (**9**) in methanol- $d_4$

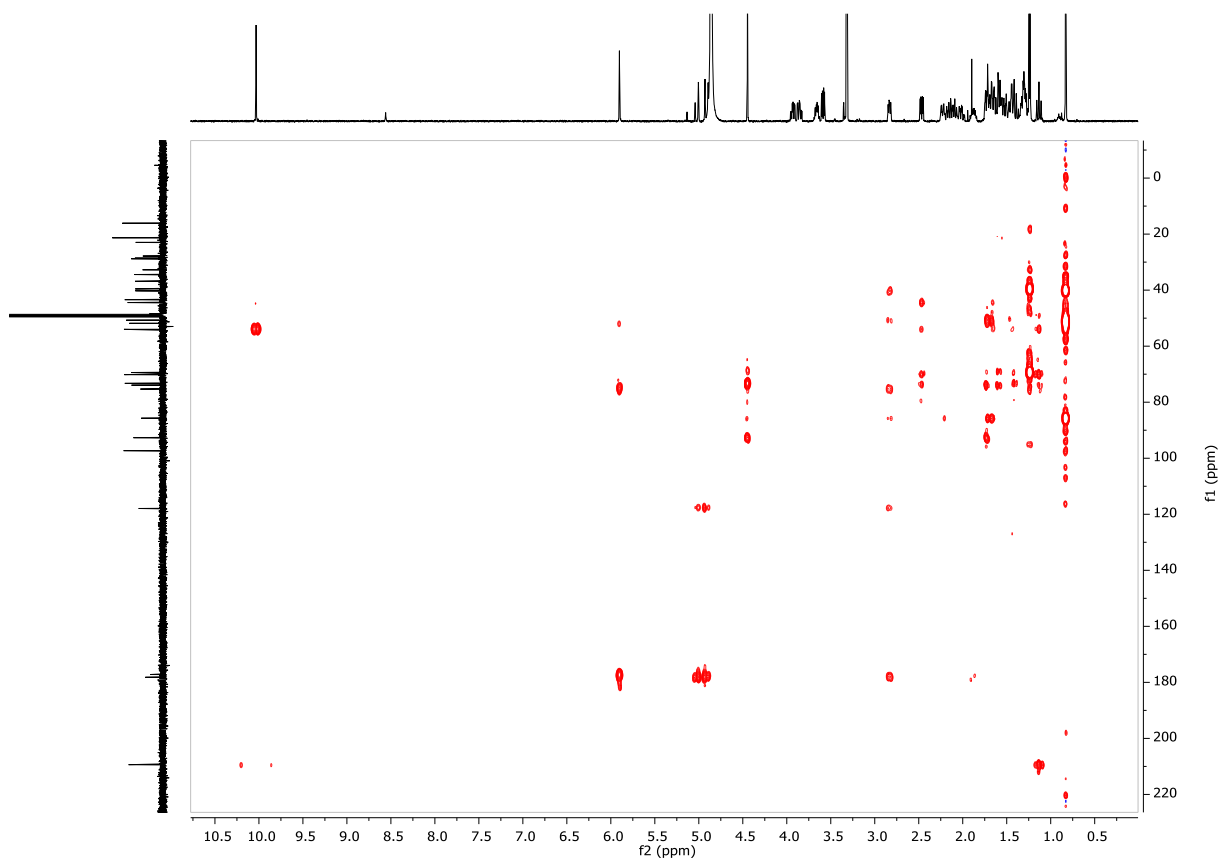

**Figure S68.** HMBC (500 MHz) spectrum of calotropin (**9**) in methanol- $d_4$

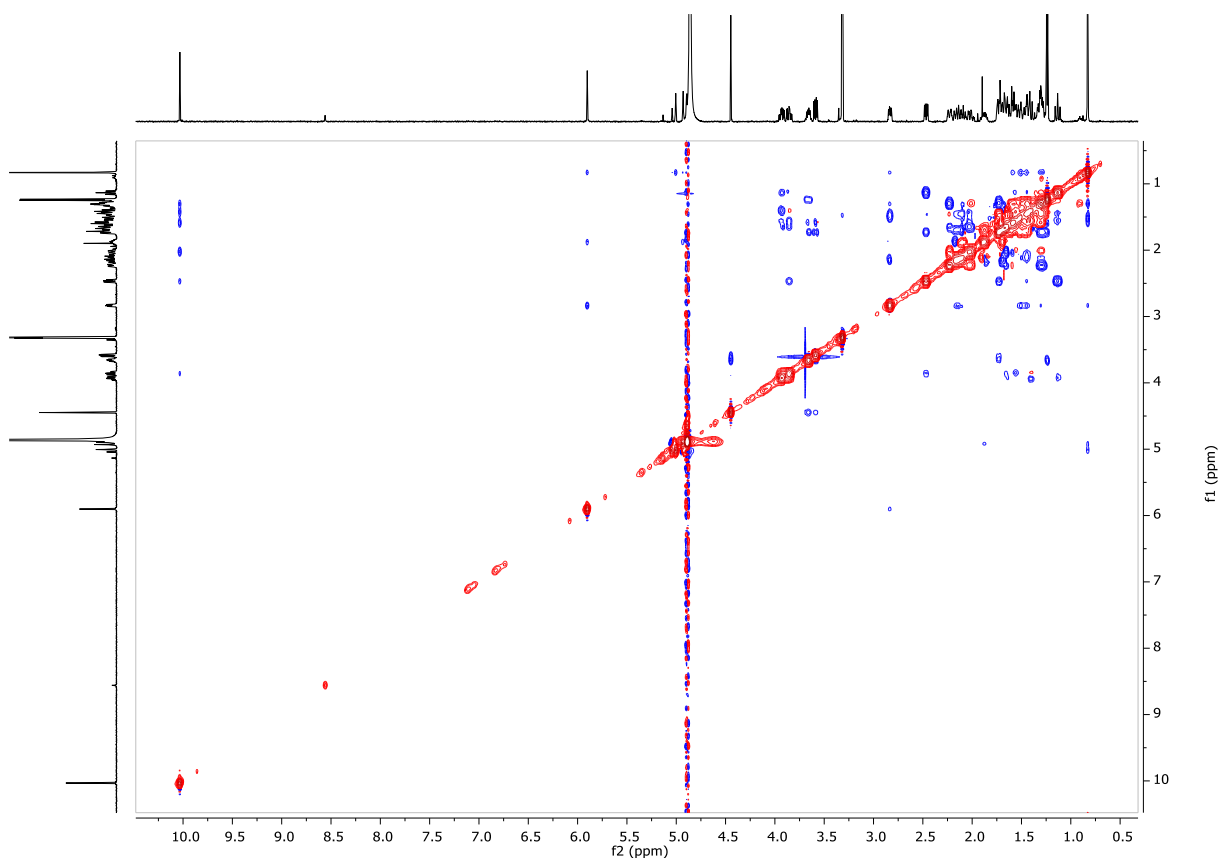

**Figure S69.** ROESY (500 MHz) spectrum of calotropin (**9**) in methanol- $d_4$

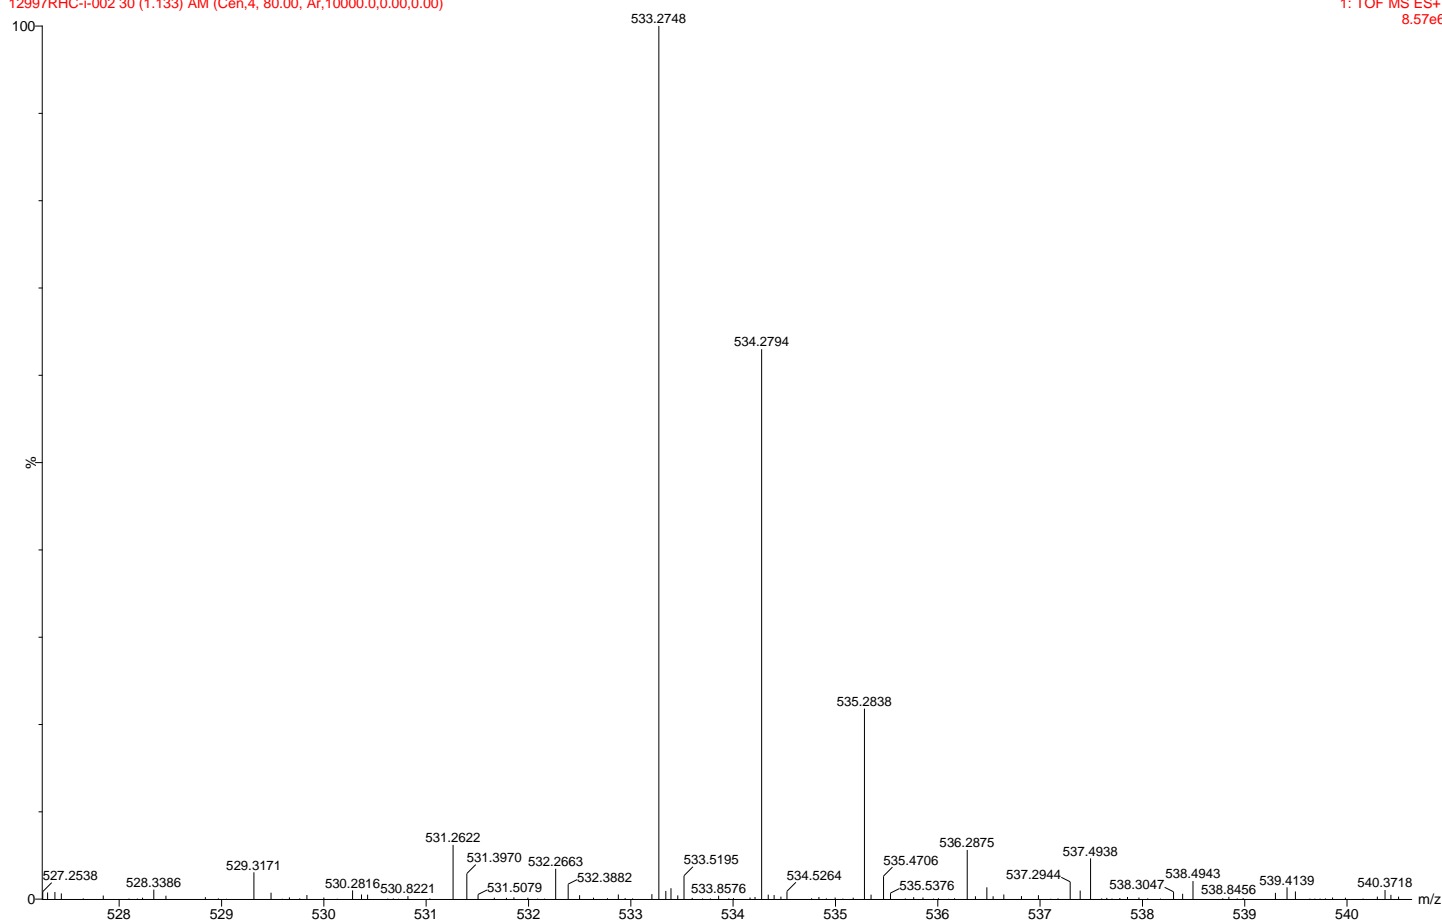

**Figure S70.** HRESIMS spectrum of calotropin (**9**)
